# Supplementary material for: Integrated Metabolome and Transcriptome Analysis Reveals a Potential Mechanism for Water Accumulation Mediated Translucency in Pineapple (Ananas comosus (L.) Merr.) Fruit
Source: MDPI journal article supplement (doi:10.3390/ijms24087199), 2023-04-13

**Figure S1: KEGG Barblots between different pineapple species.**

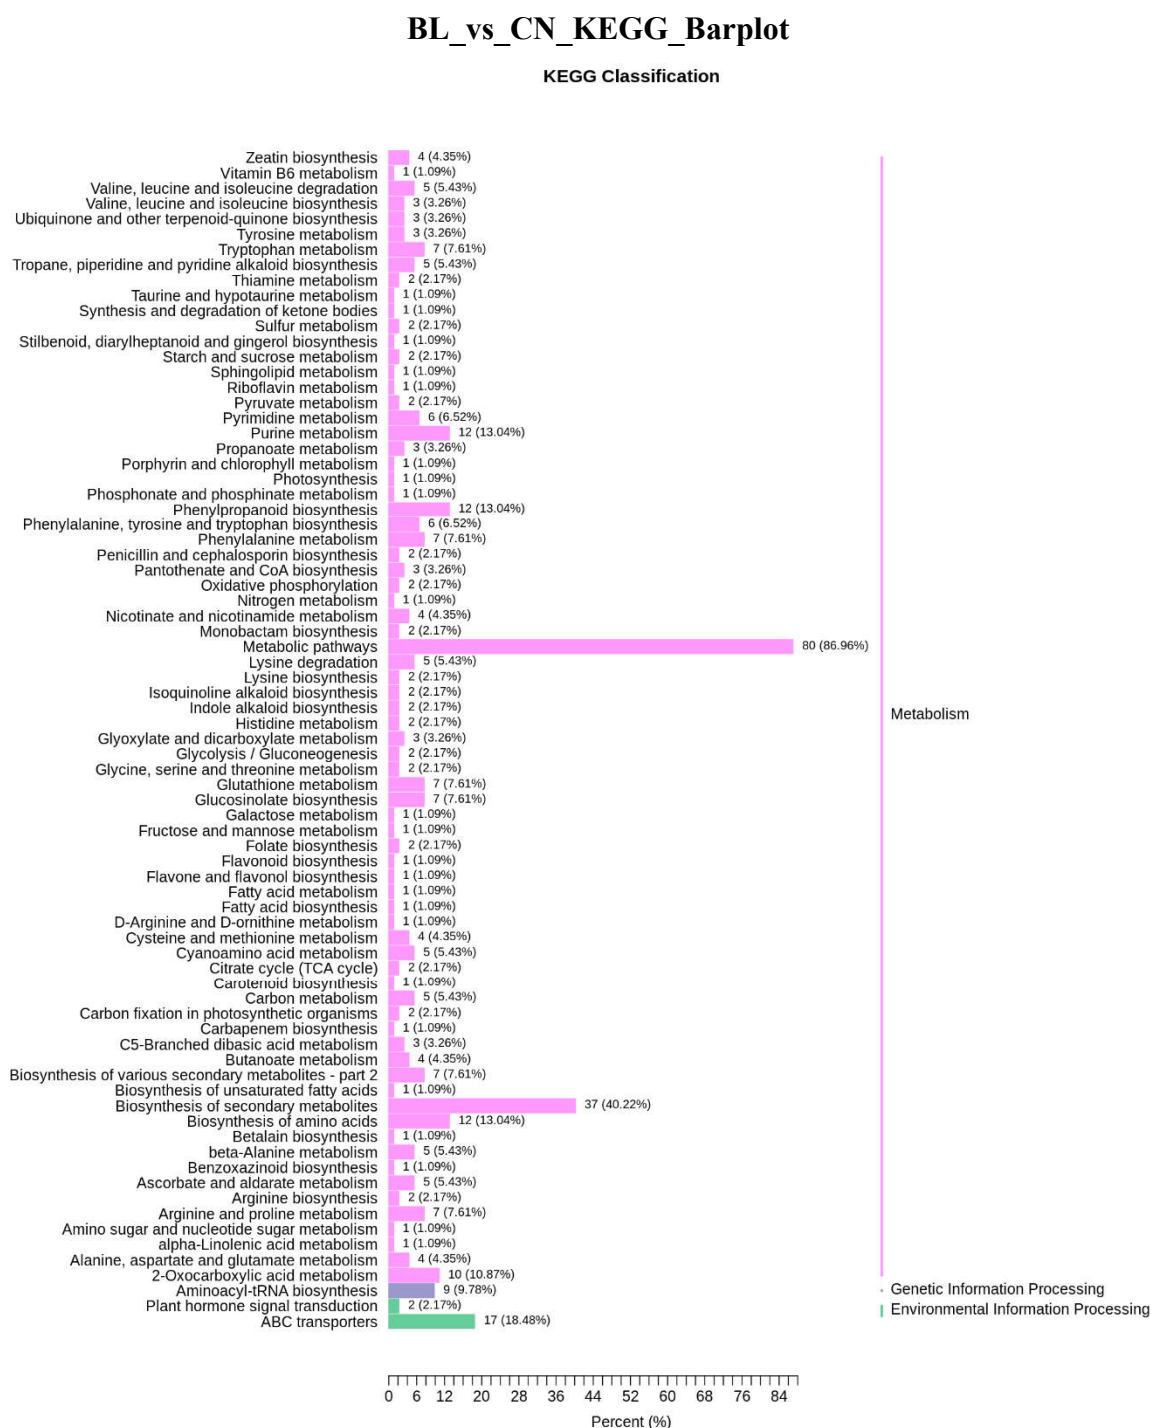

Figure S1: KEGG Barblots between different pineapple species.

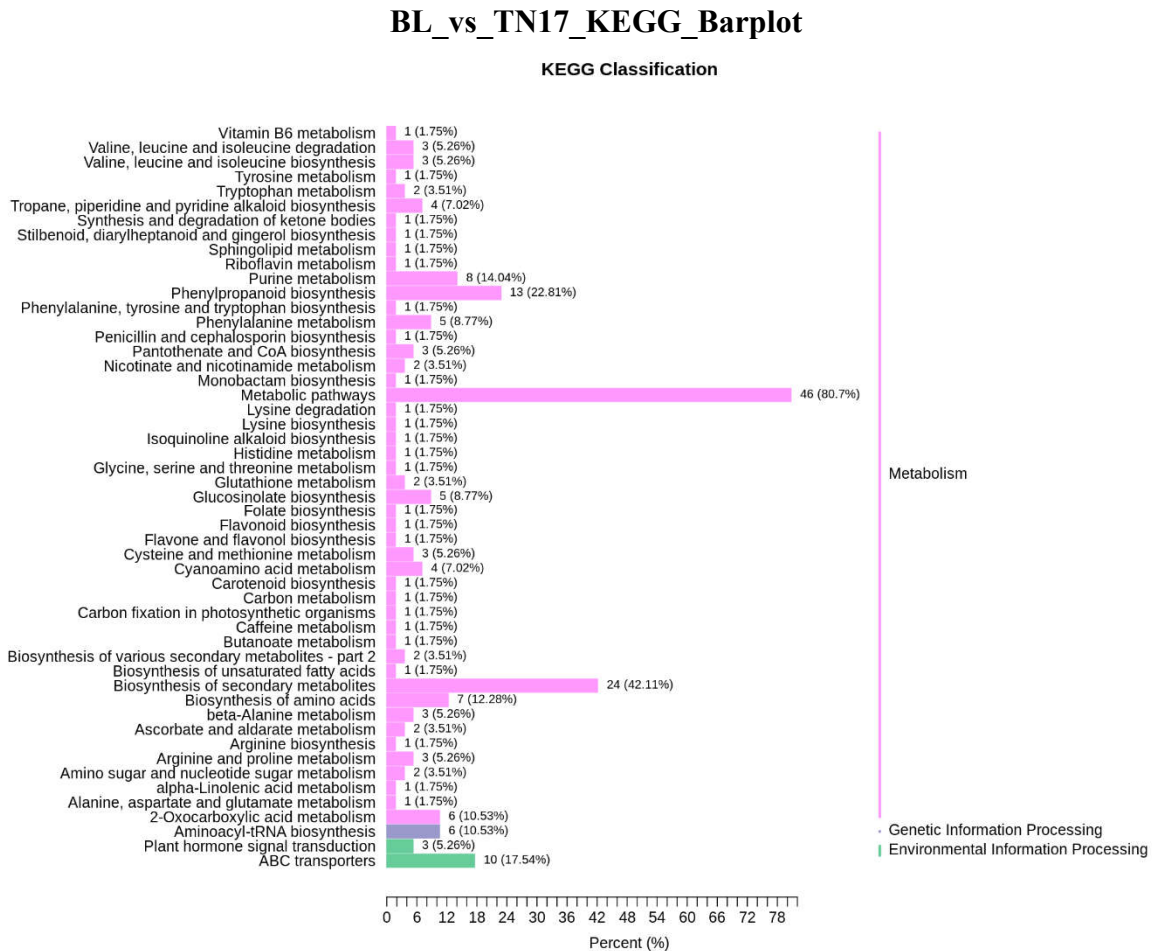

Figure S1: KEGG Barblots between different pineapple species.

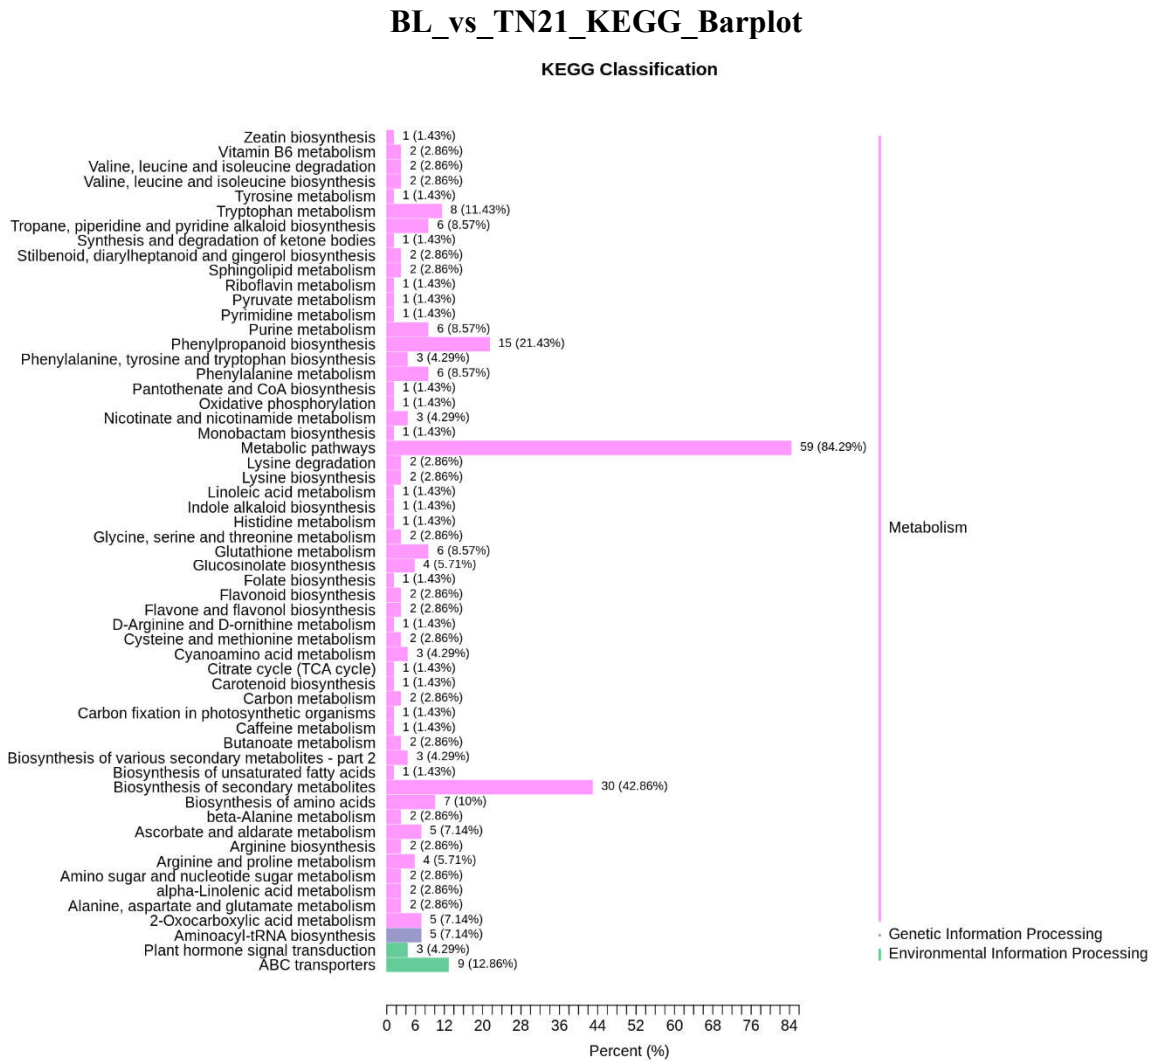

Figure S1: KEGG Barblots between different pineapple species.

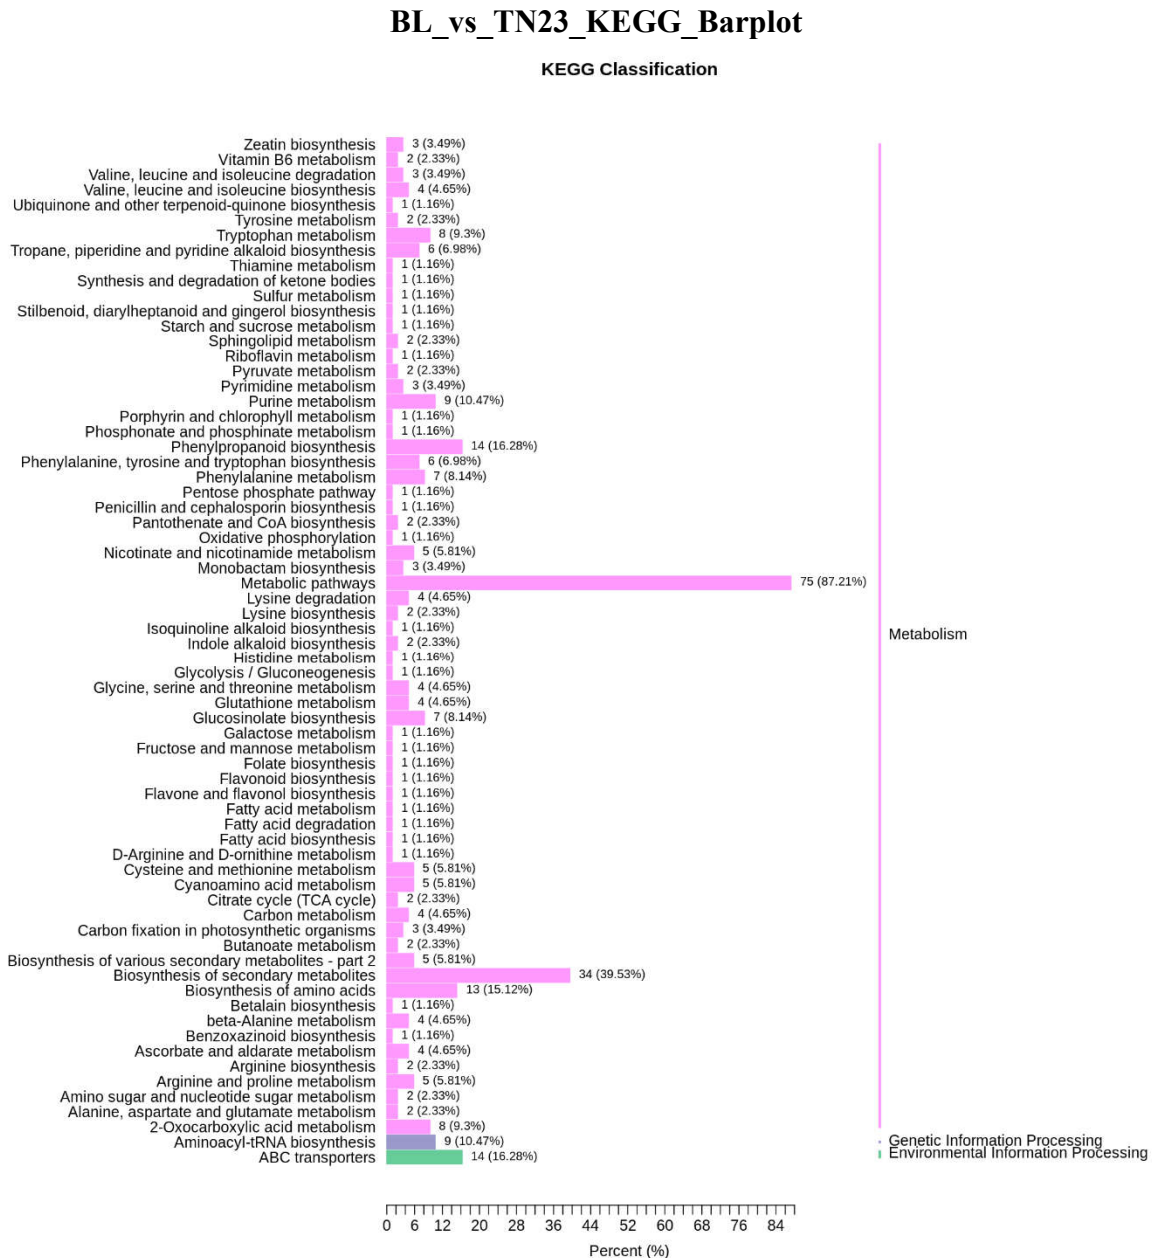

Figure S1: KEGG Barblots between different pineapple species.

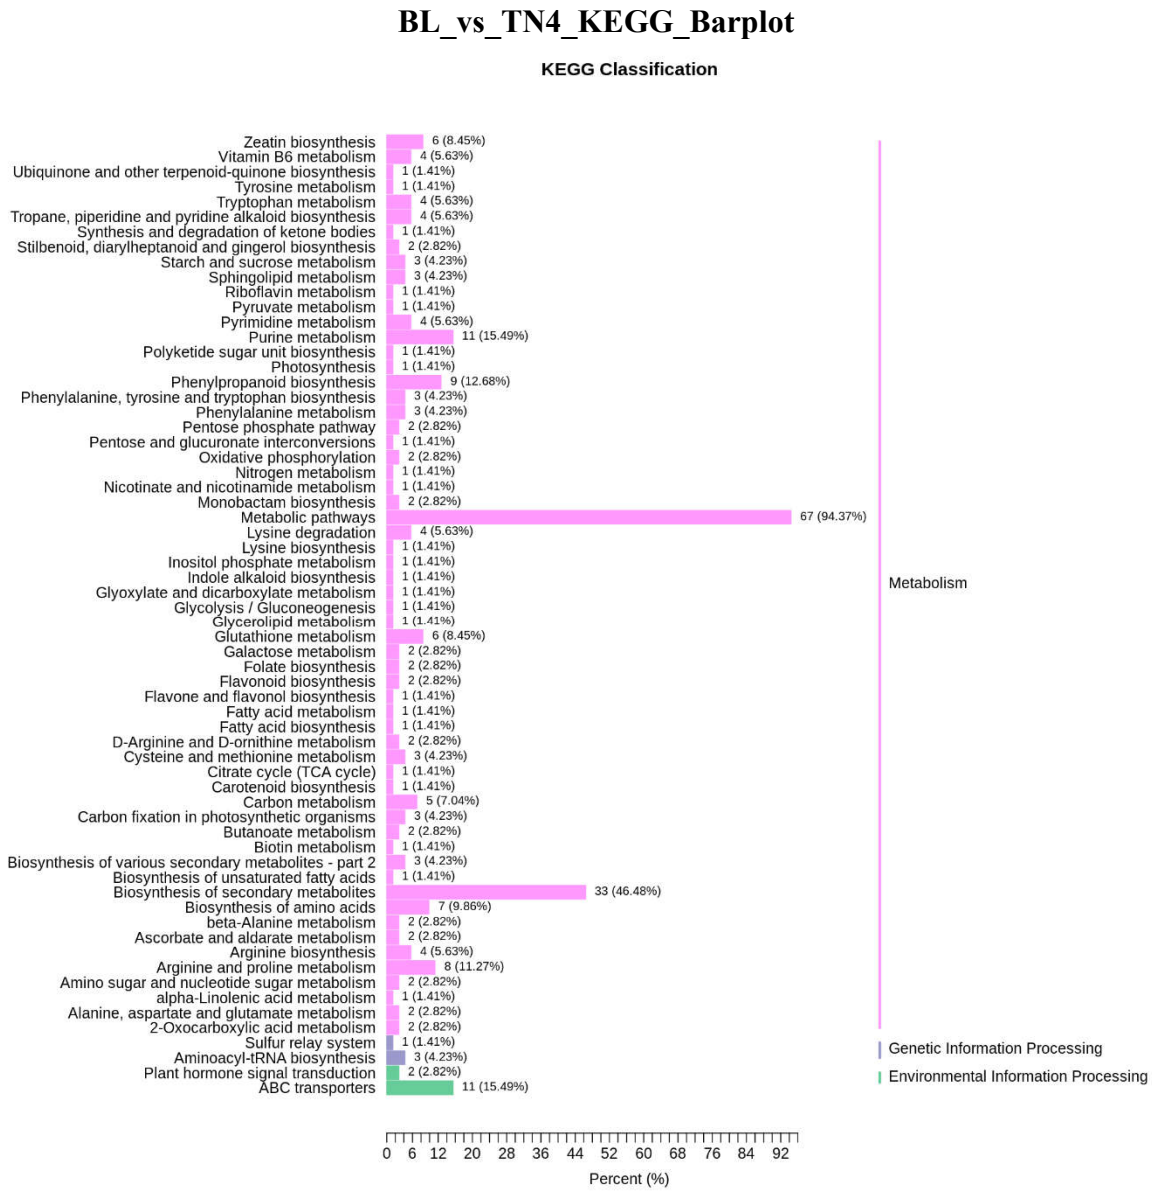



Figure S1: KEGG Barblots between different pineapple species.

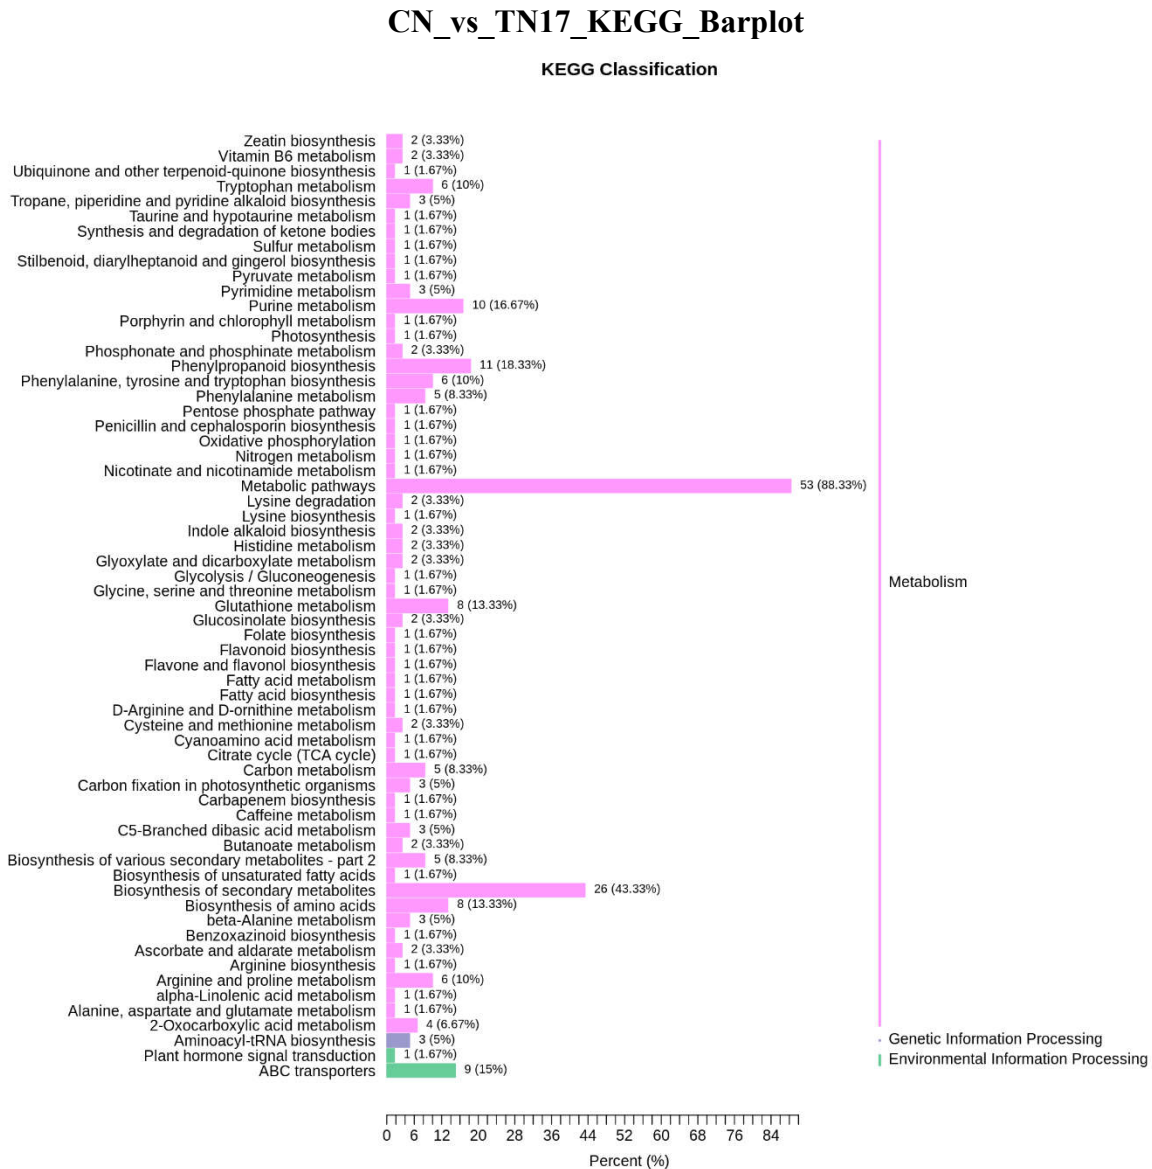

Figure S1: KEGG Barblots between different pineapple species.

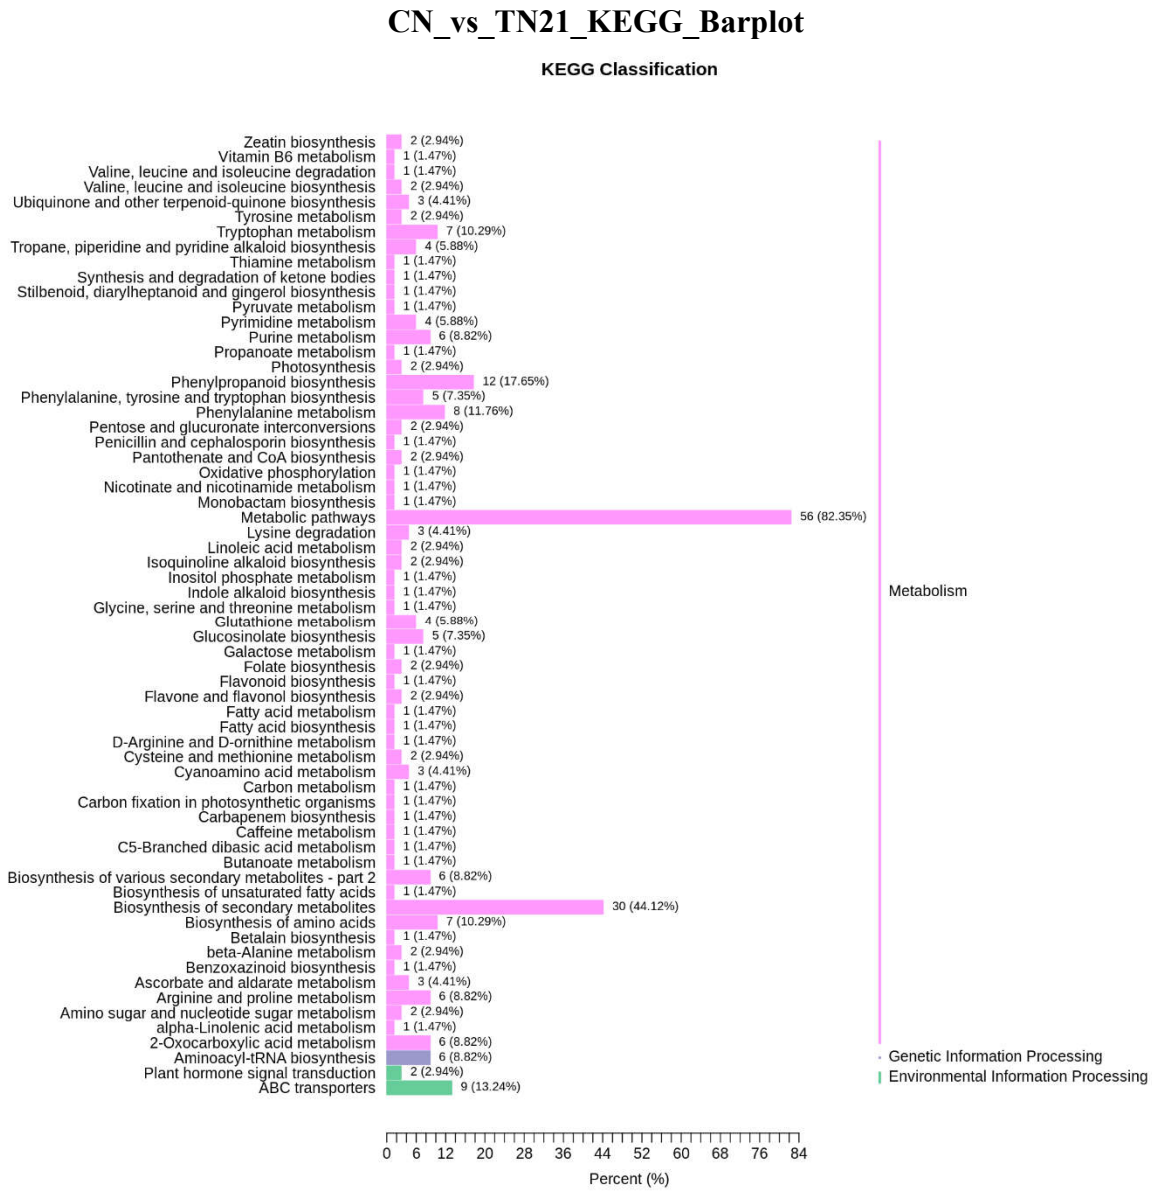

Figure S1: KEGG Barblots between different pineapple species.

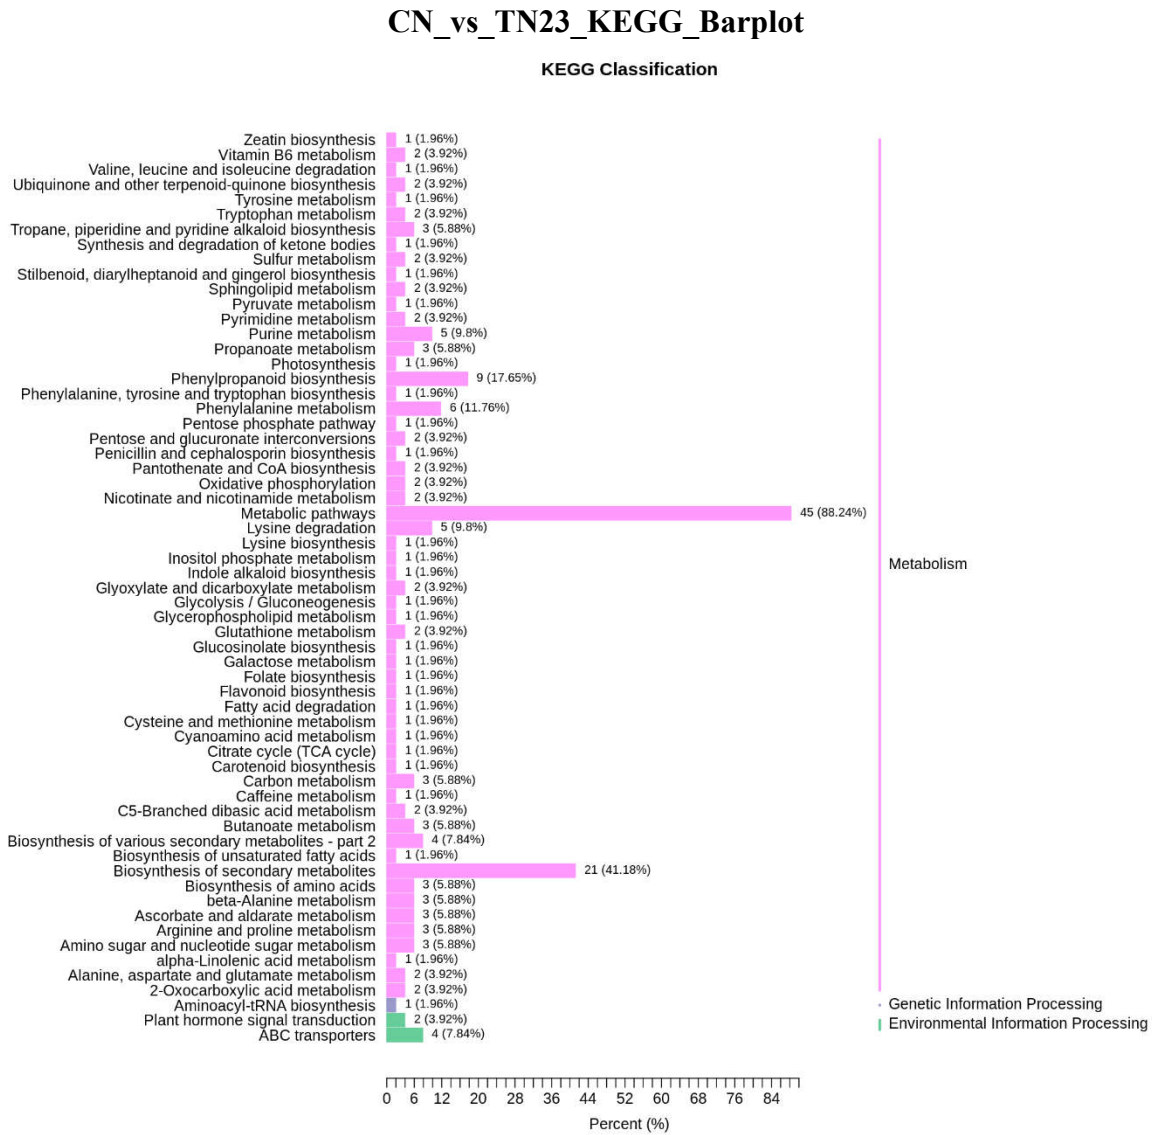



Figure S1: KEGG Barblots between different pineapple species.

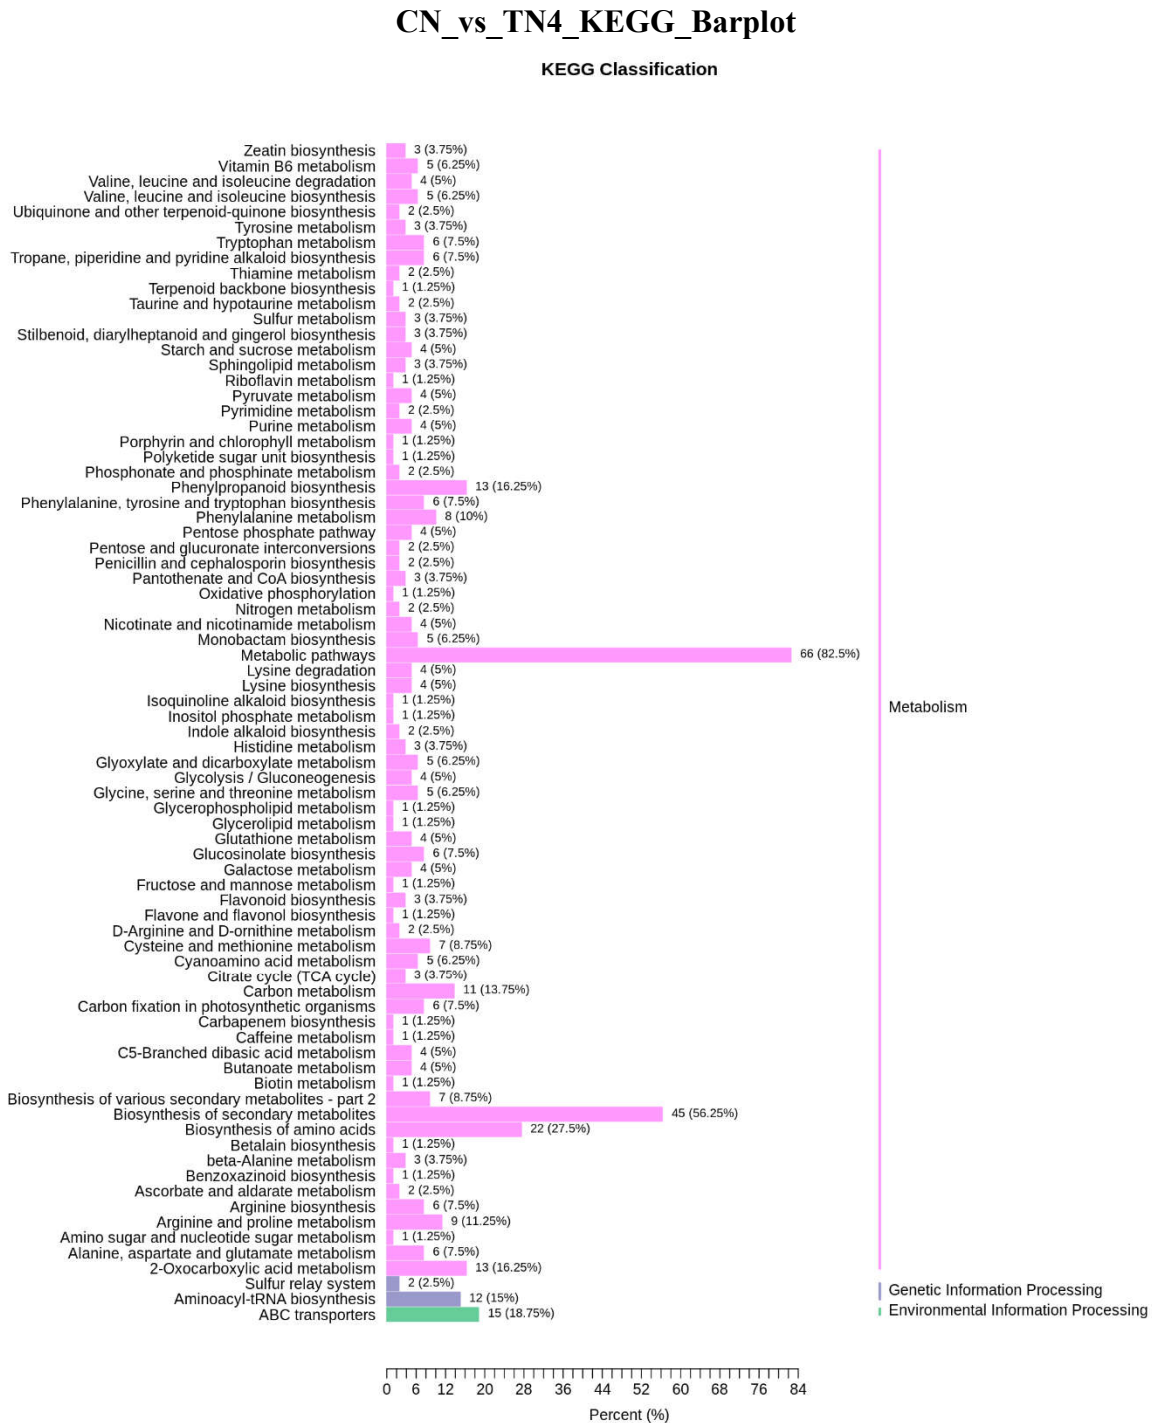

Figure S1: KEGG Barblots between different pineapple species.

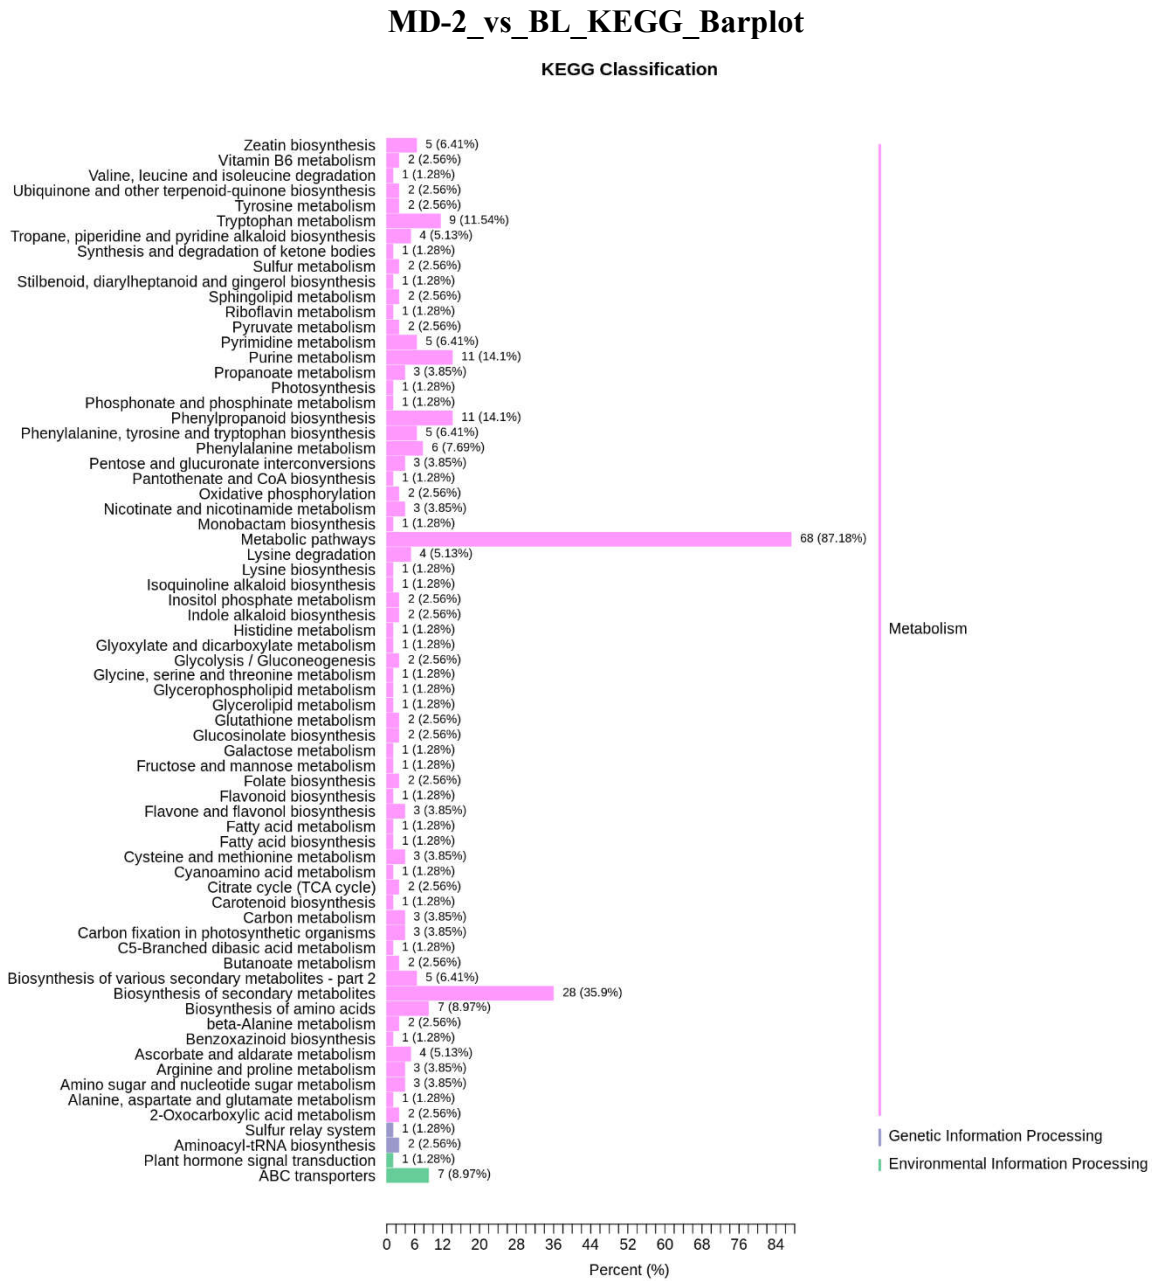

Figure S1: KEGG Barblots between different pineapple species.

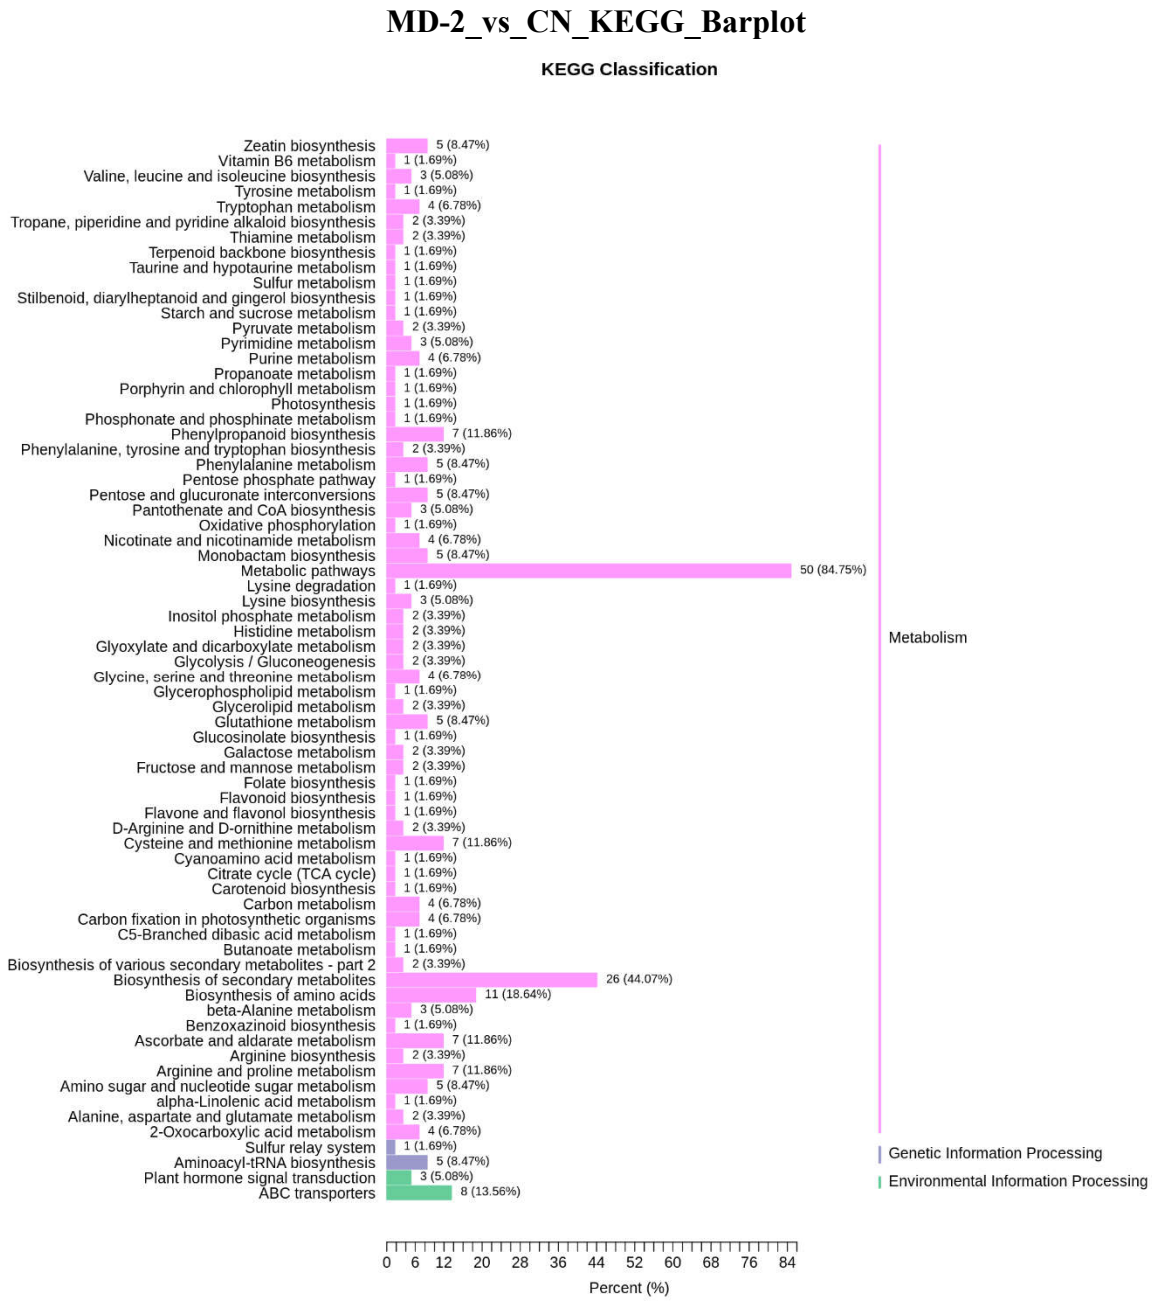

**Figure S1: KEGG Barblots between different pineapple species.**

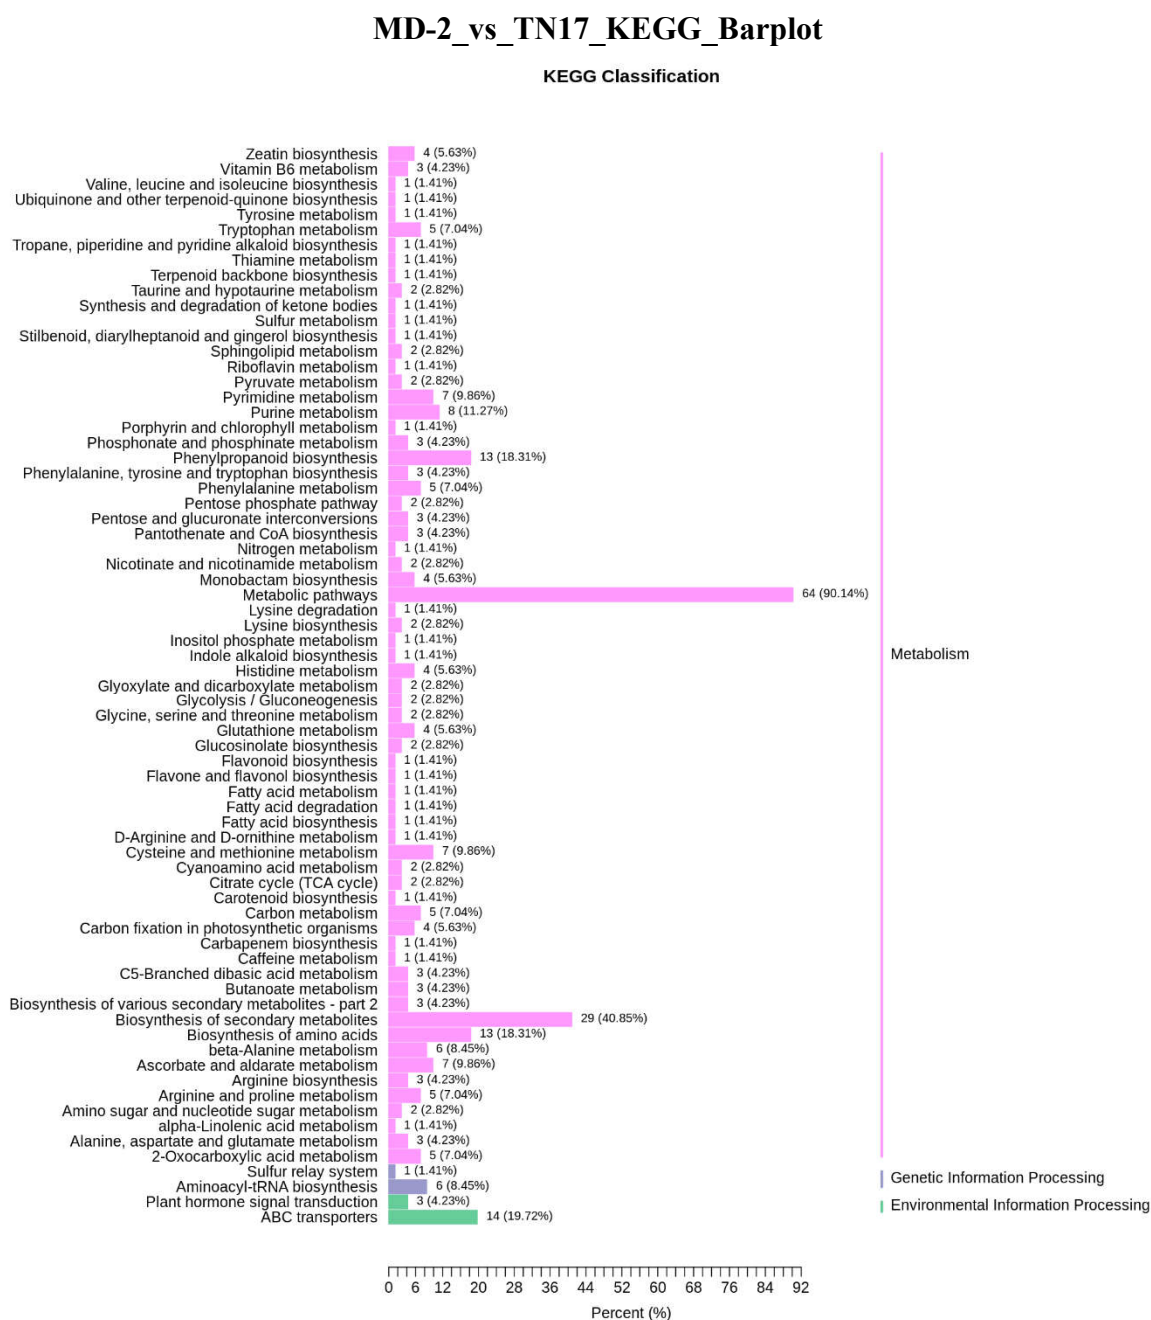

**Figure S1: KEGG Barblots between different pineapple species.**

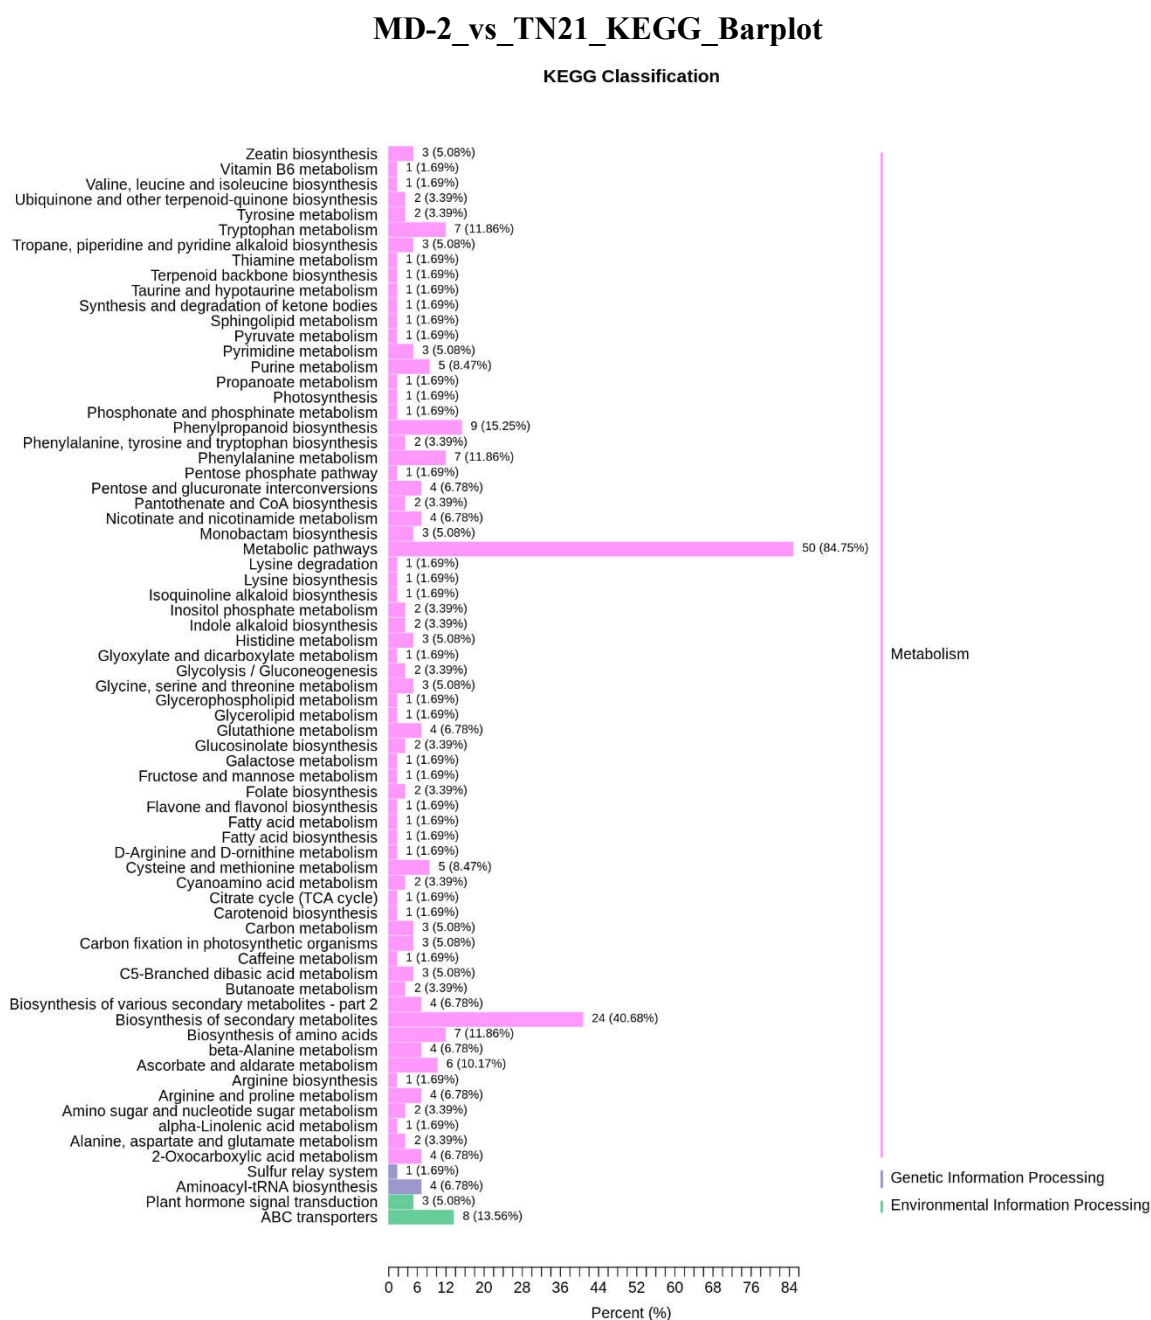



**Figure S1: KEGG Barblots between different pineapple species.**

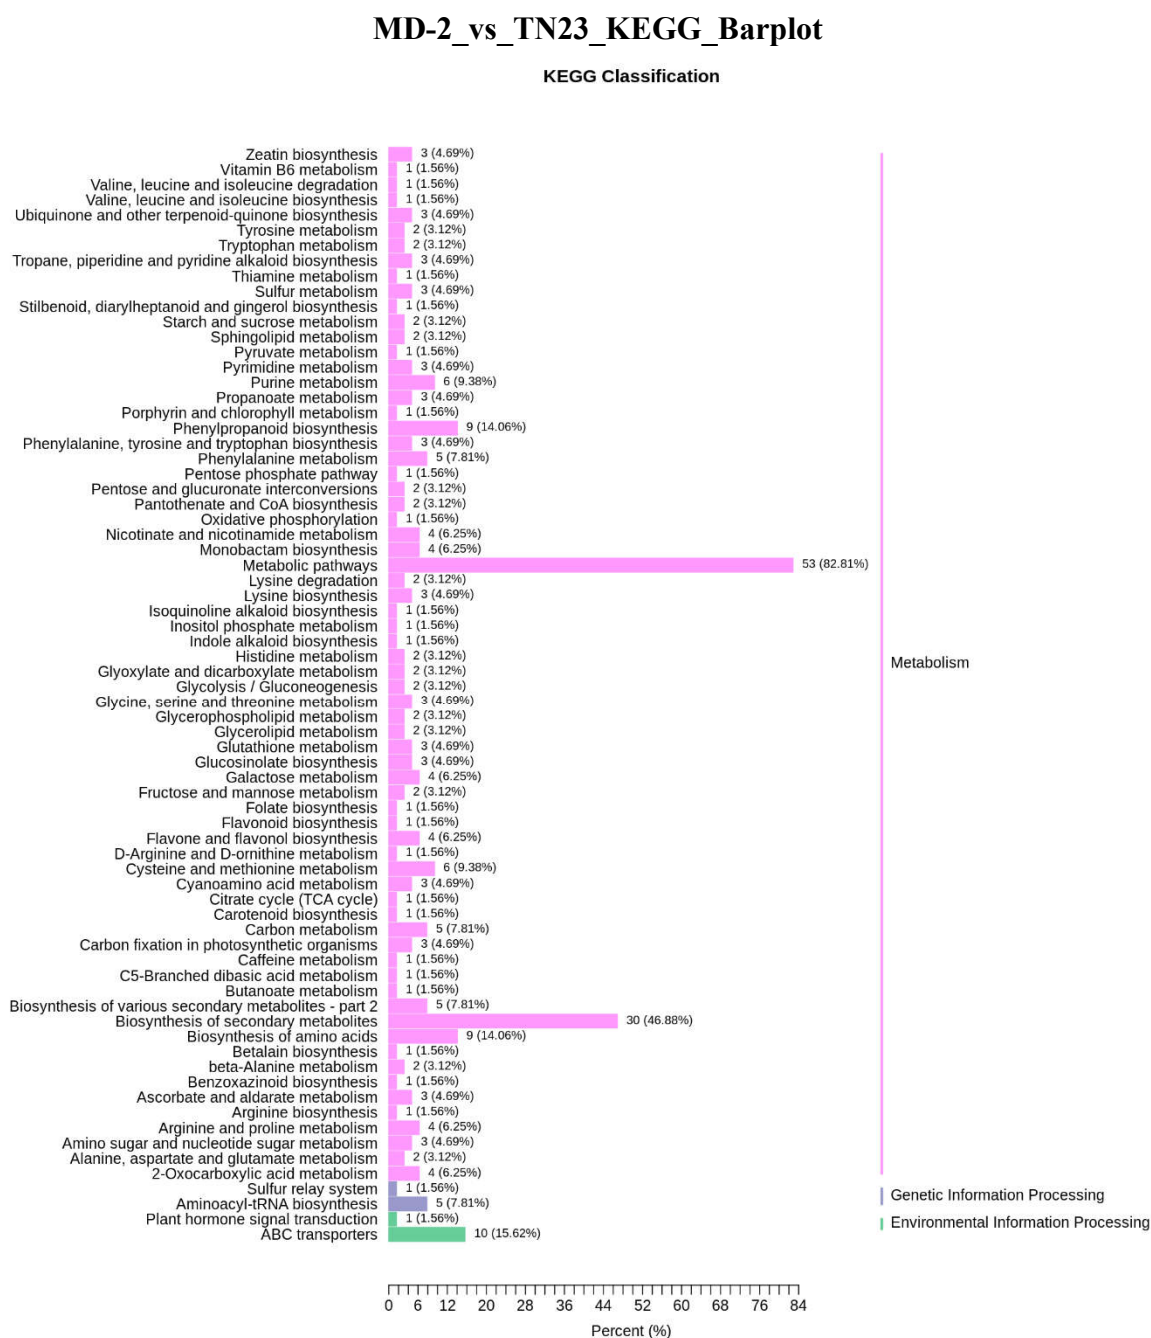

**Figure S1: KEGG Barblots between different pineapple species.**

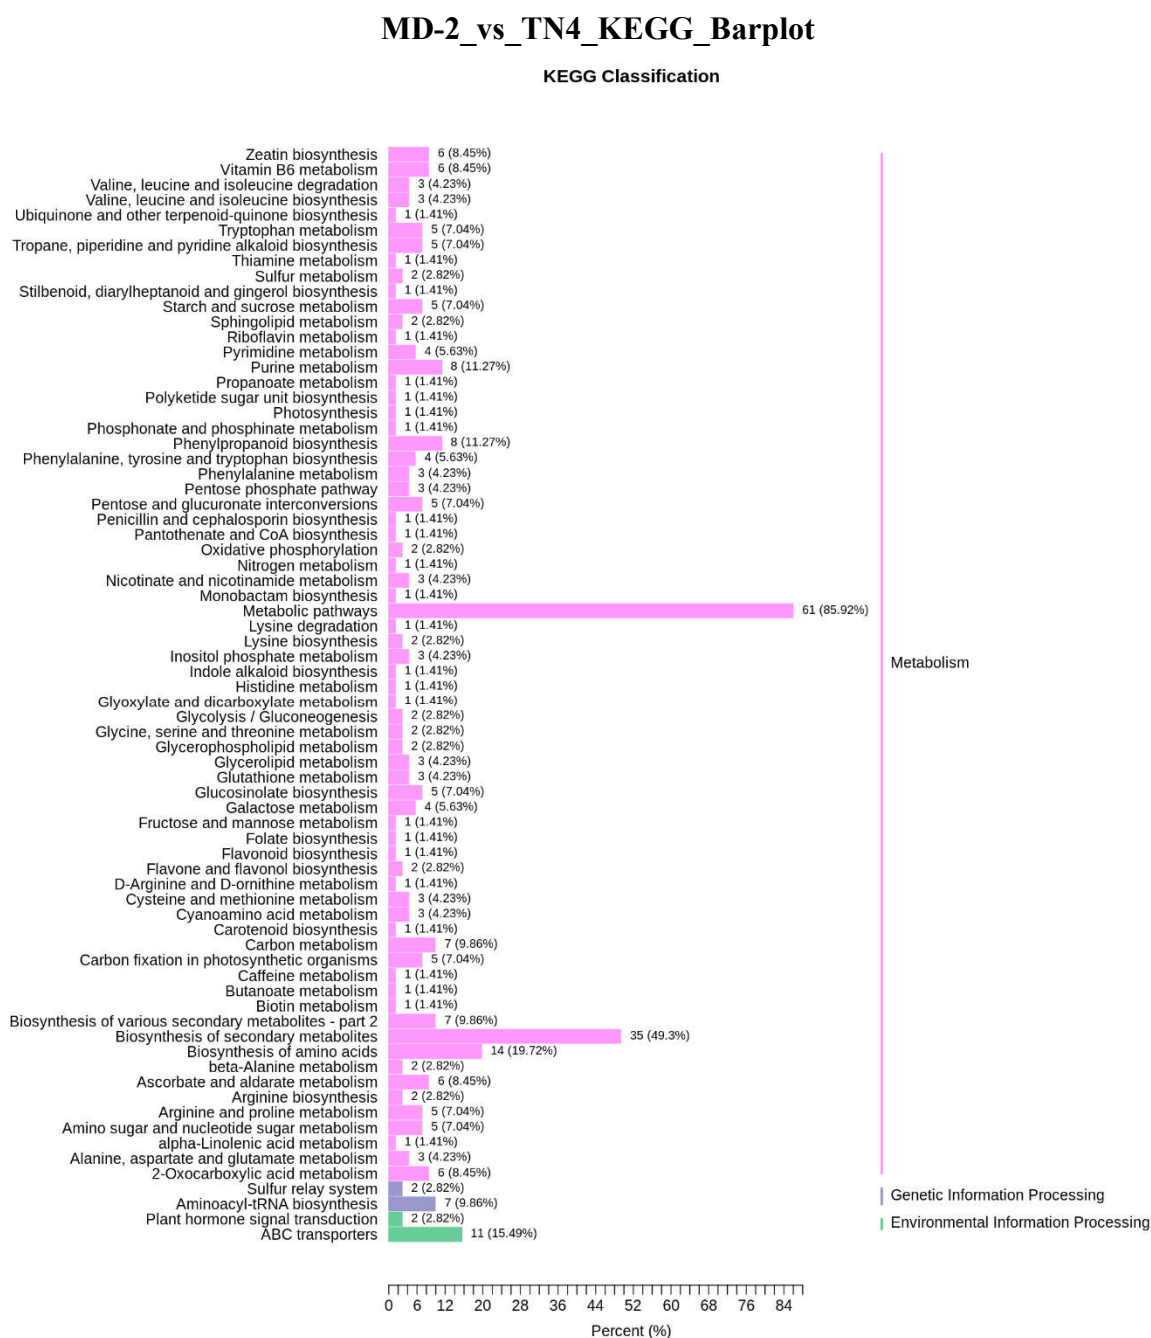

Figure S1: KEGG Barblots between different pineapple species.

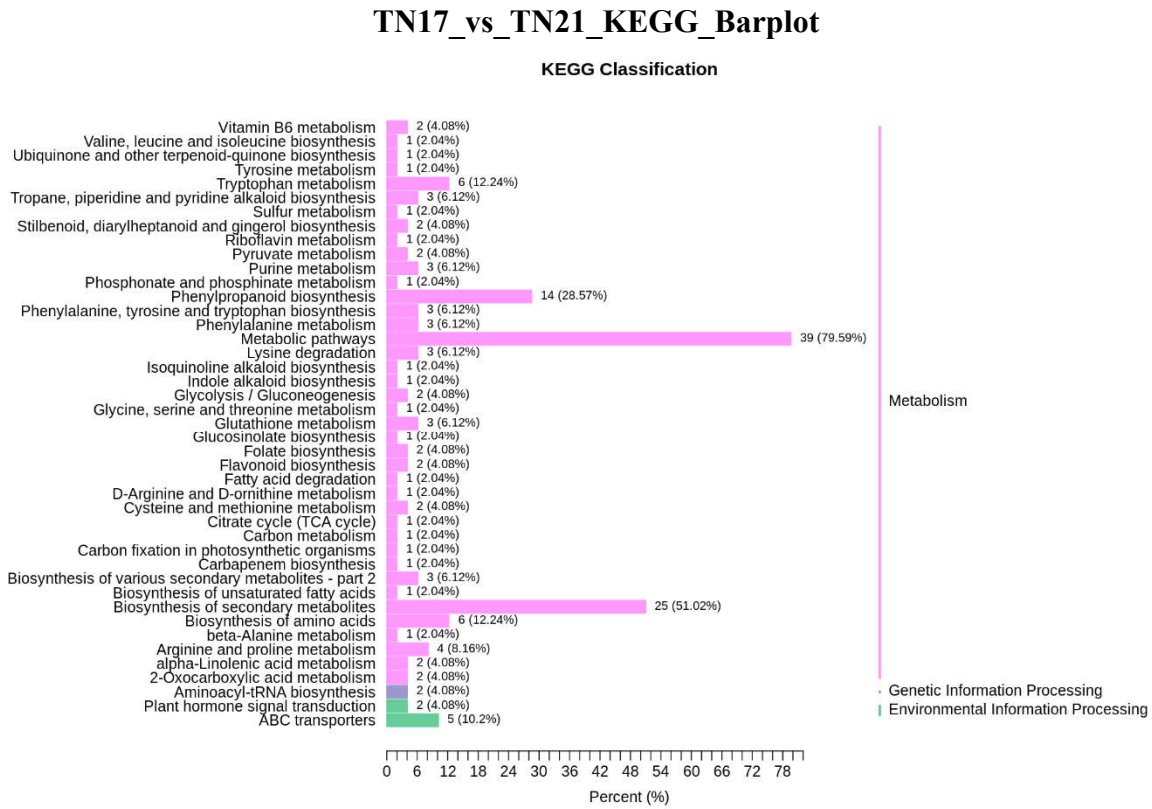

Figure S1: KEGG Barblots between different pineapple species.

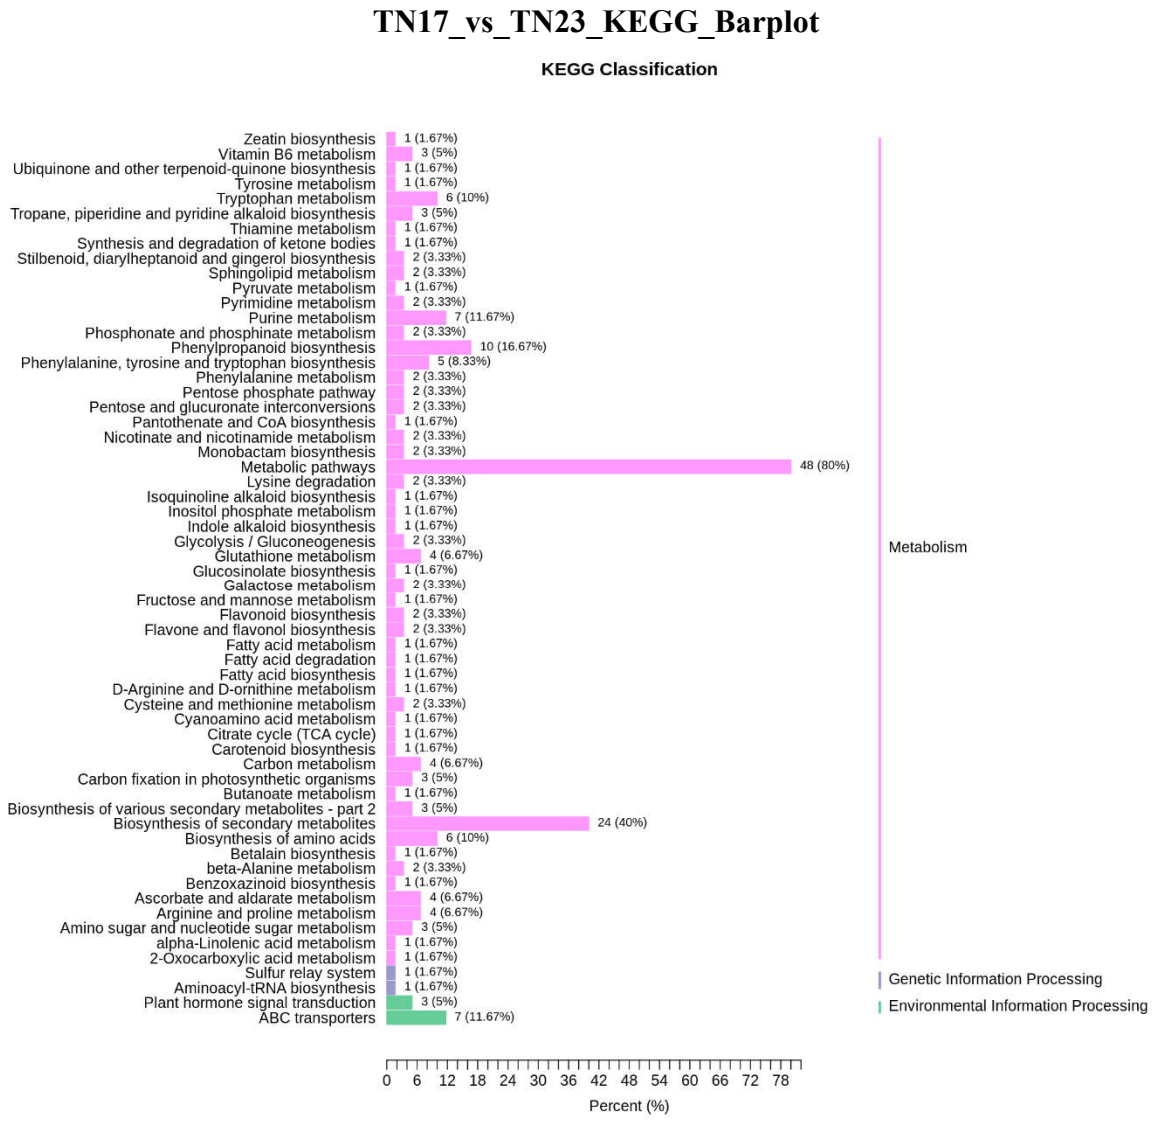

Figure S1: KEGG Barblots between different pineapple species.

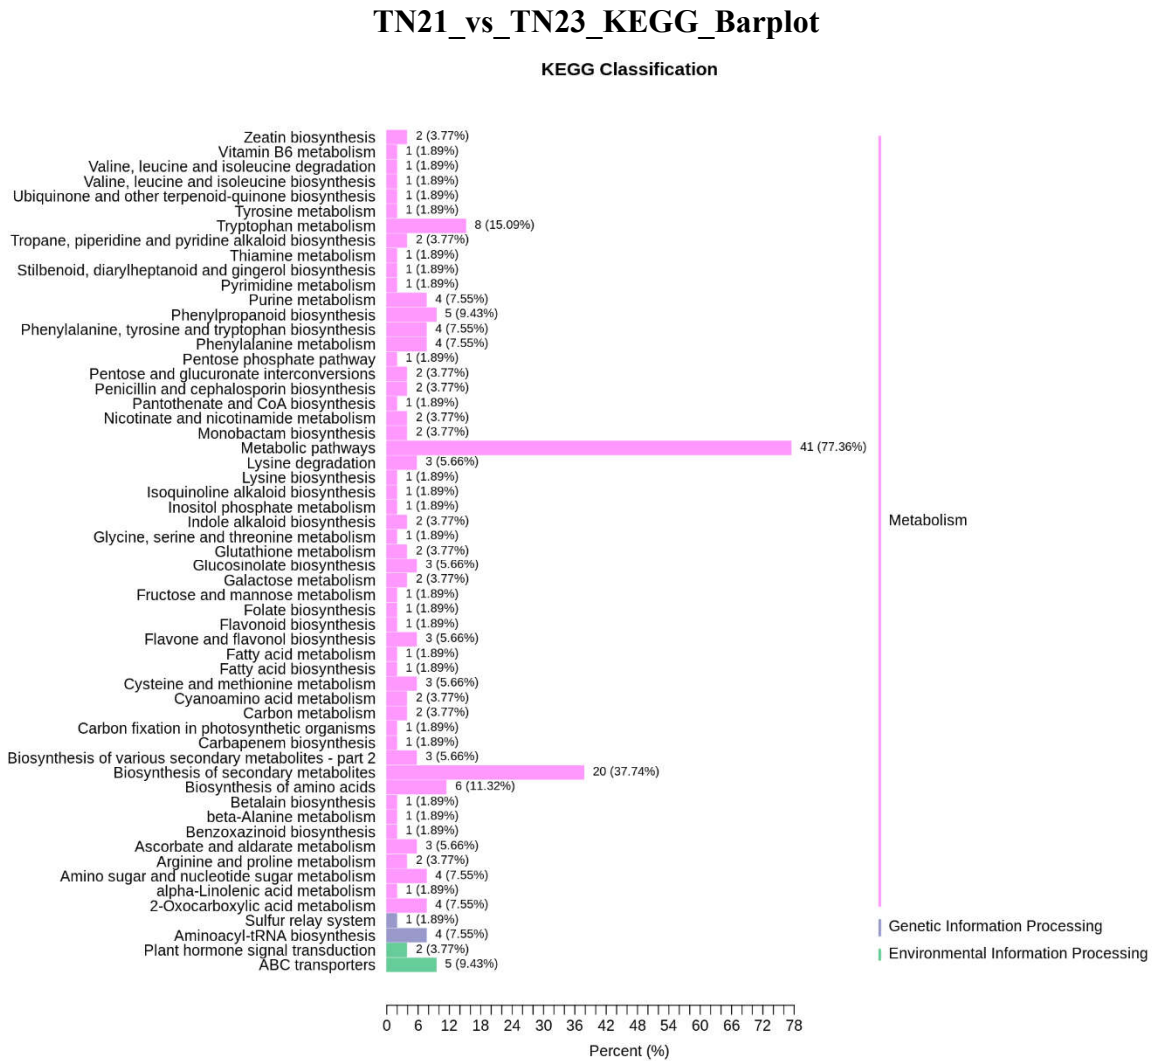



**Figure S1: KEGG Barblots between different pineapple species.**

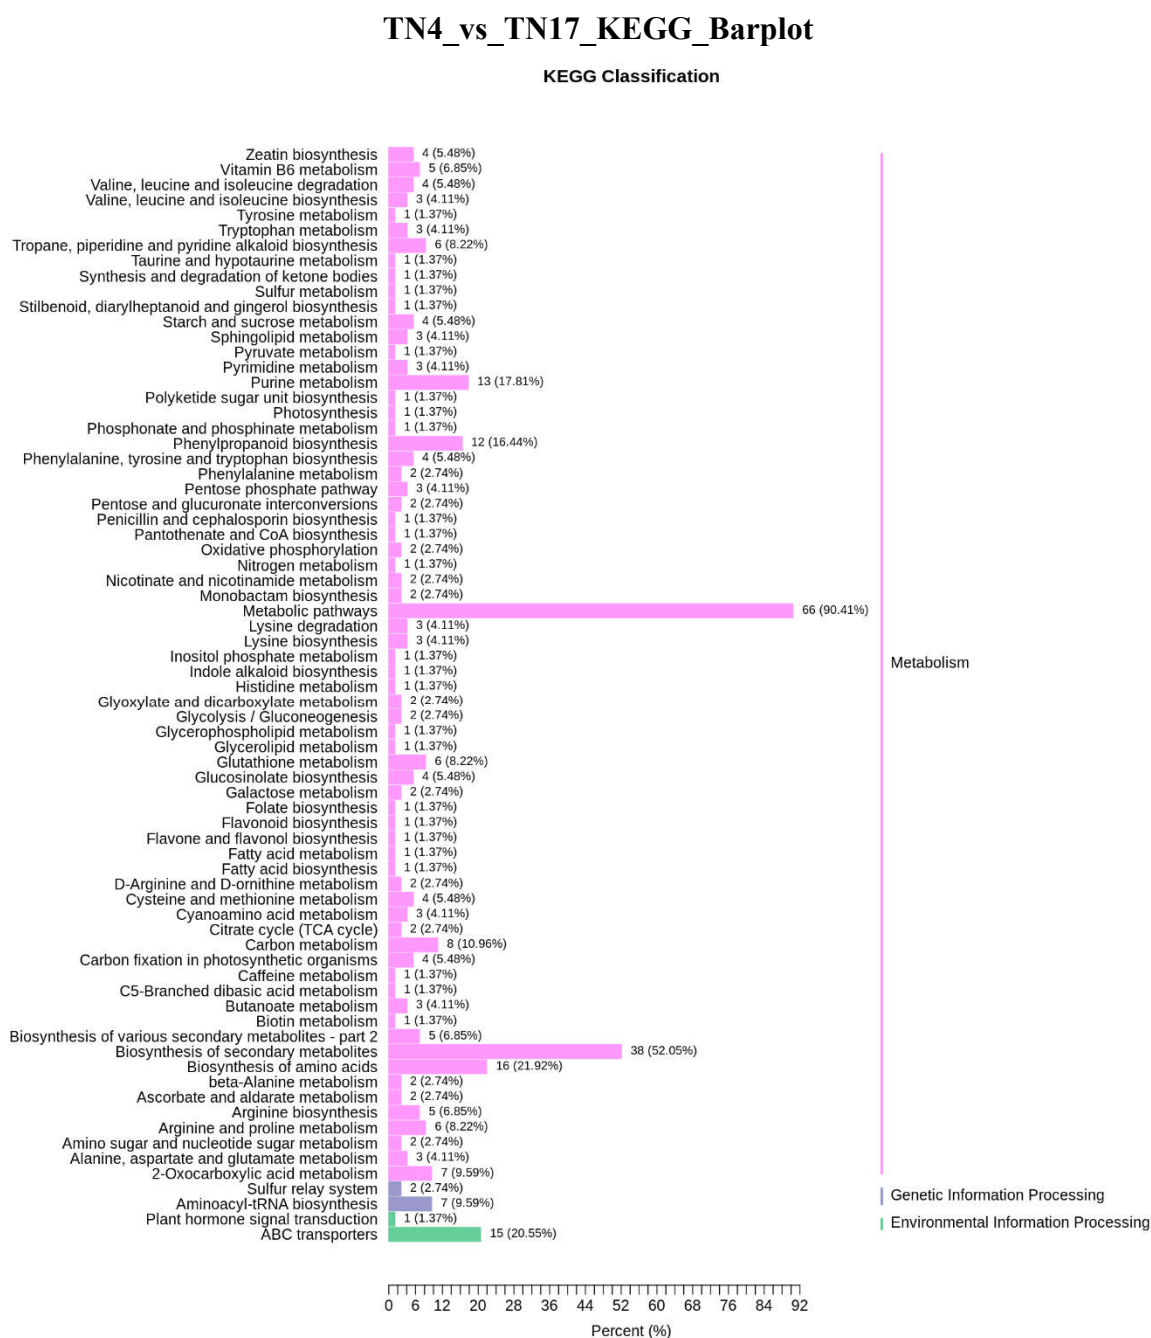

Figure S1: KEGG Barblots between different pineapple species.

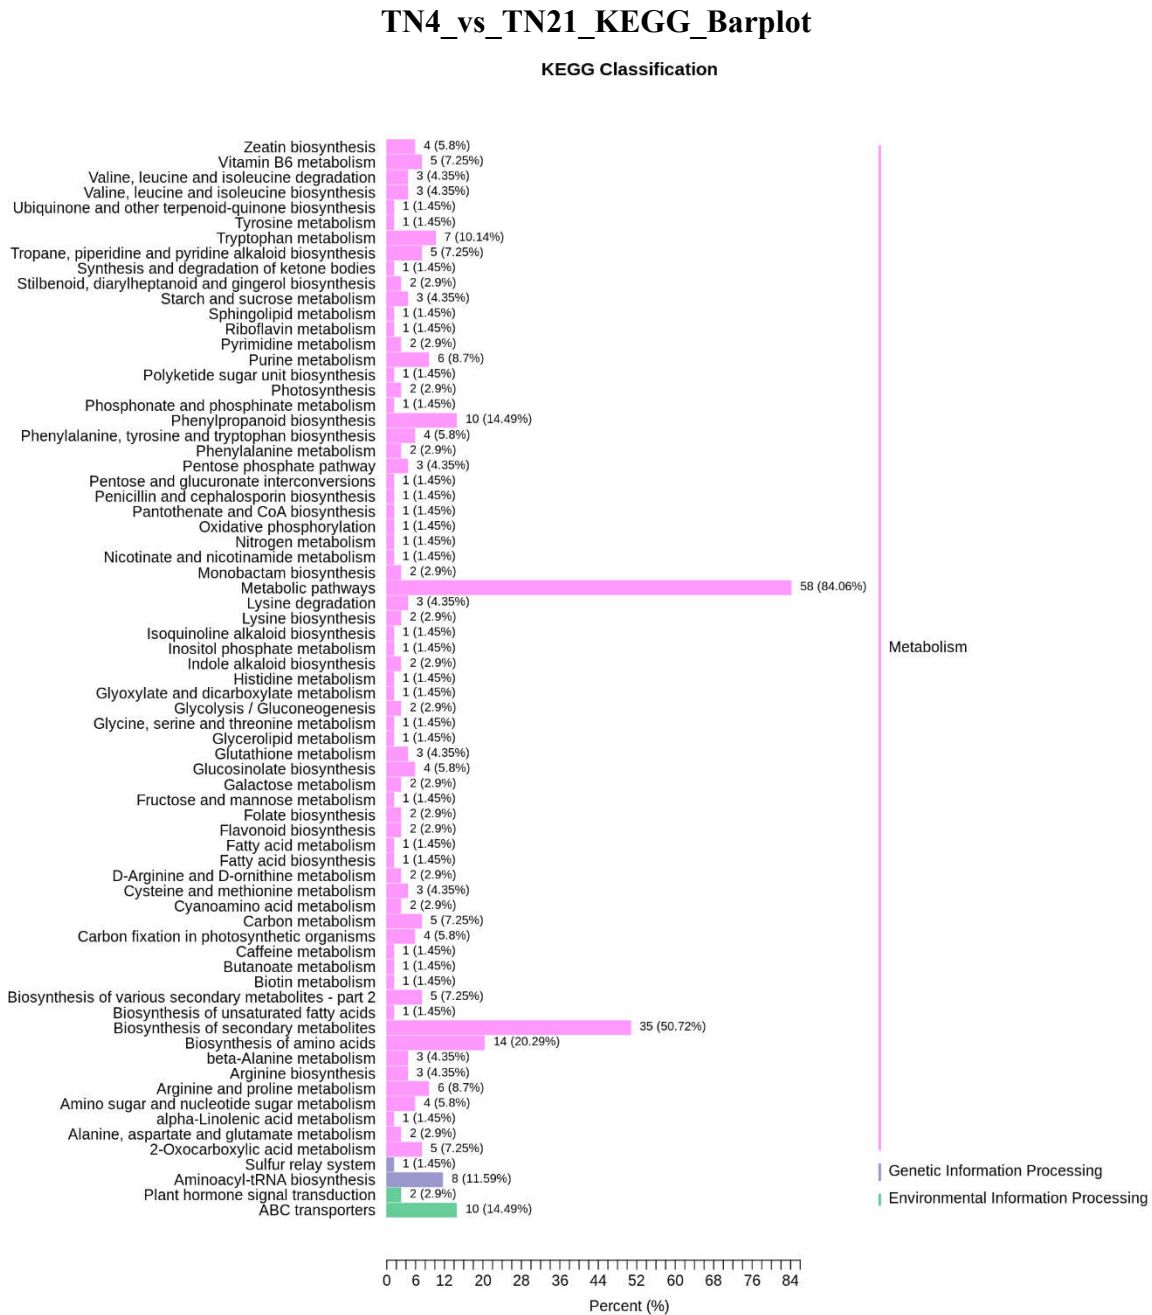

**Figure S1: KEGG Barblots between different pineapple species.**

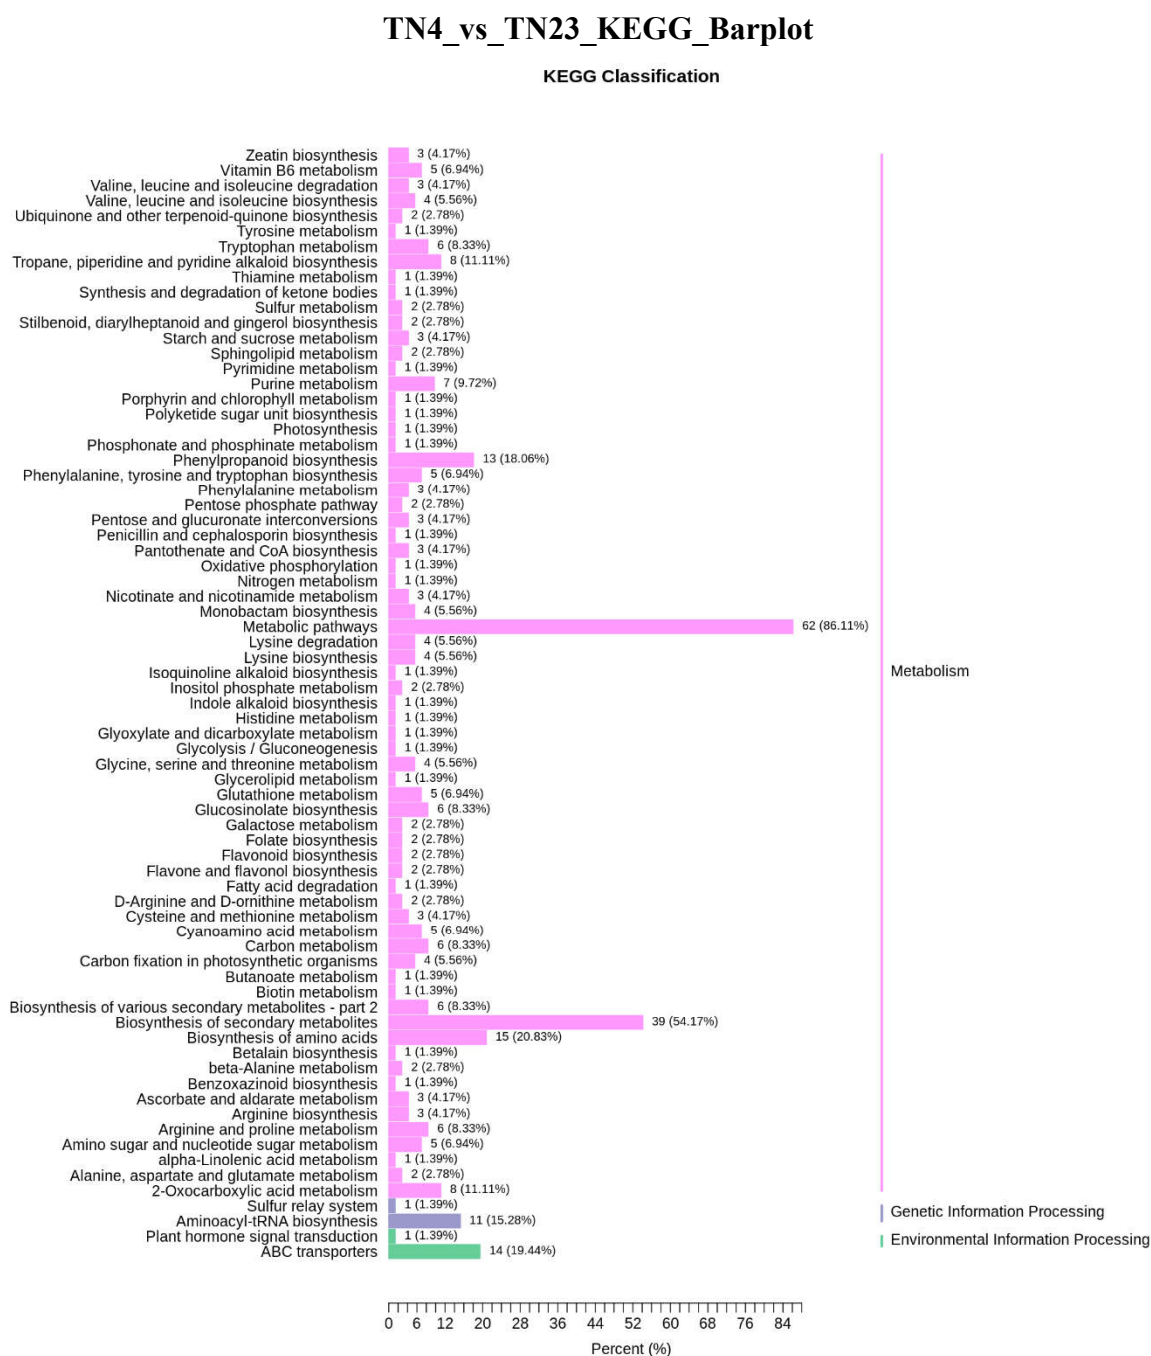

Supplement: s1 [file s1]
