# Supplementary material for: Integrated Metabolome and Transcriptome Analysis Reveals a Potential Mechanism for Water Accumulation Mediated Translucency in Pineapple (Ananas comosus (L.) Merr.) Fruit
Source: MDPI journal article supplement (doi:10.3390/ijms24087199), 2023-04-13

**Figure S3: The volcano graph of DEG between different pineapple species**

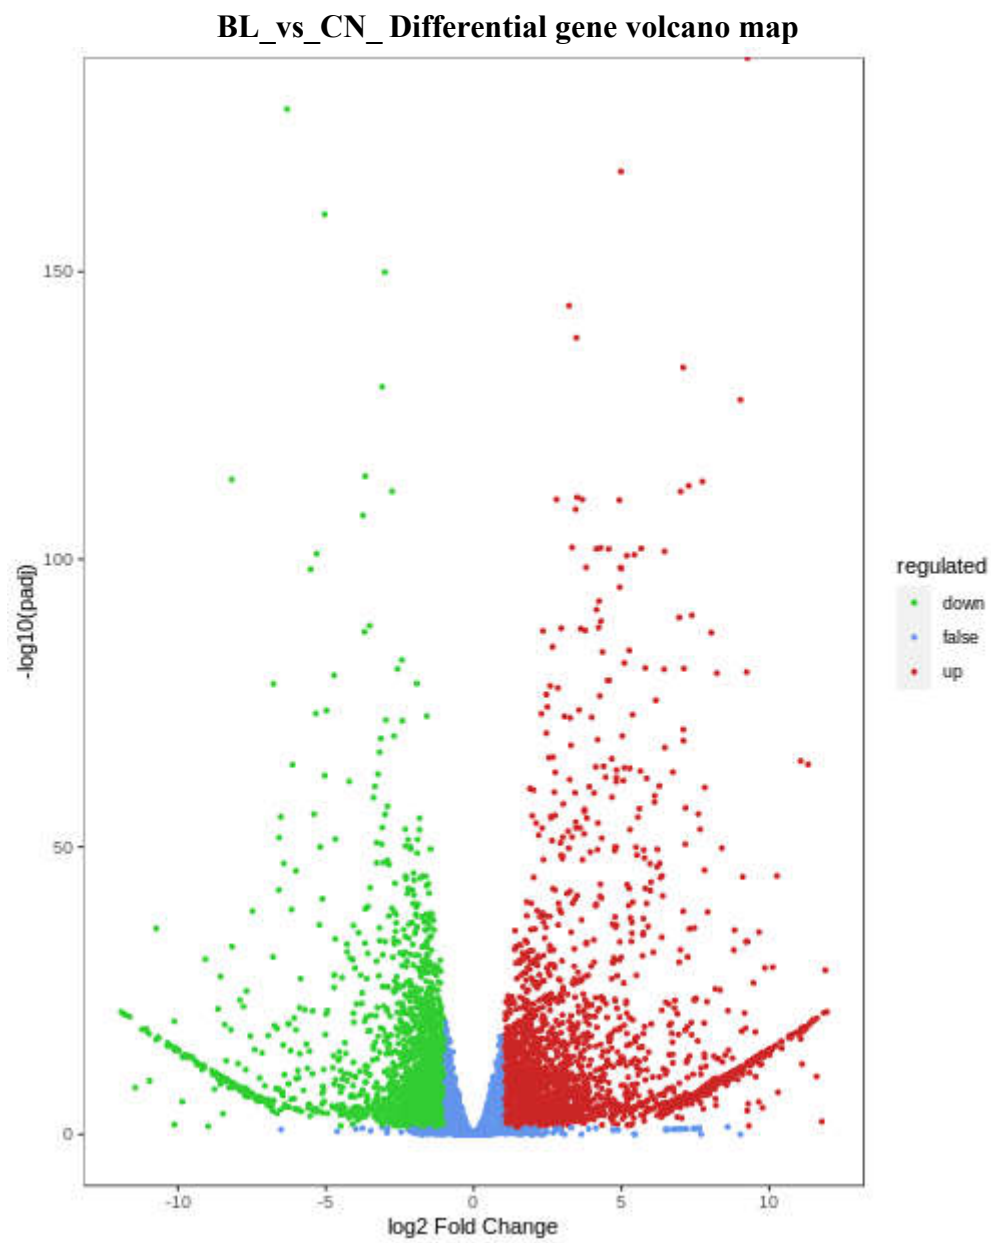

**Figure S3: The volcano graph of DEG between different pineapple species**

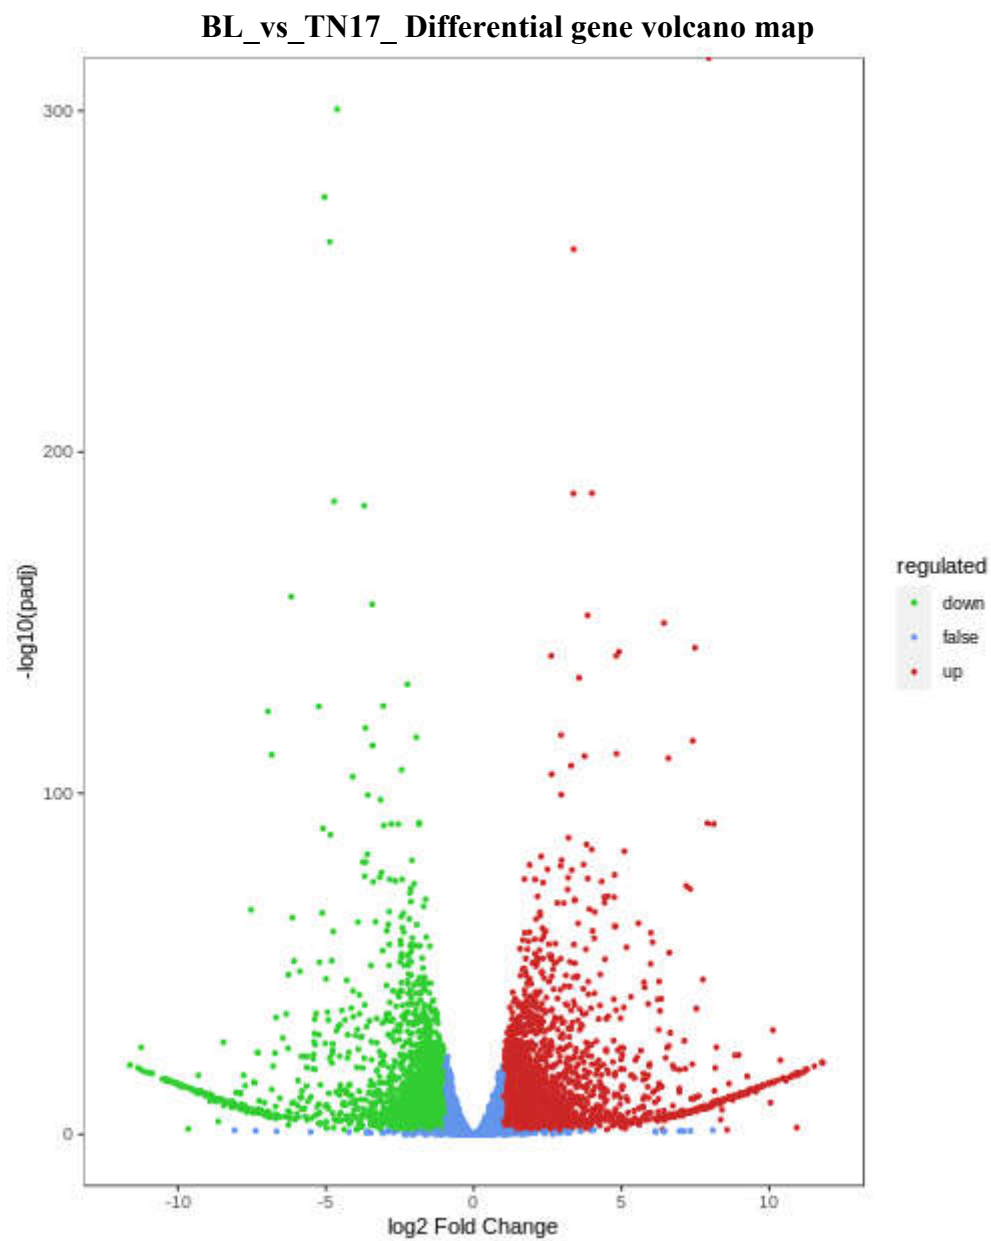

**Figure S3: The volcano graph of DEG between different pineapple species**

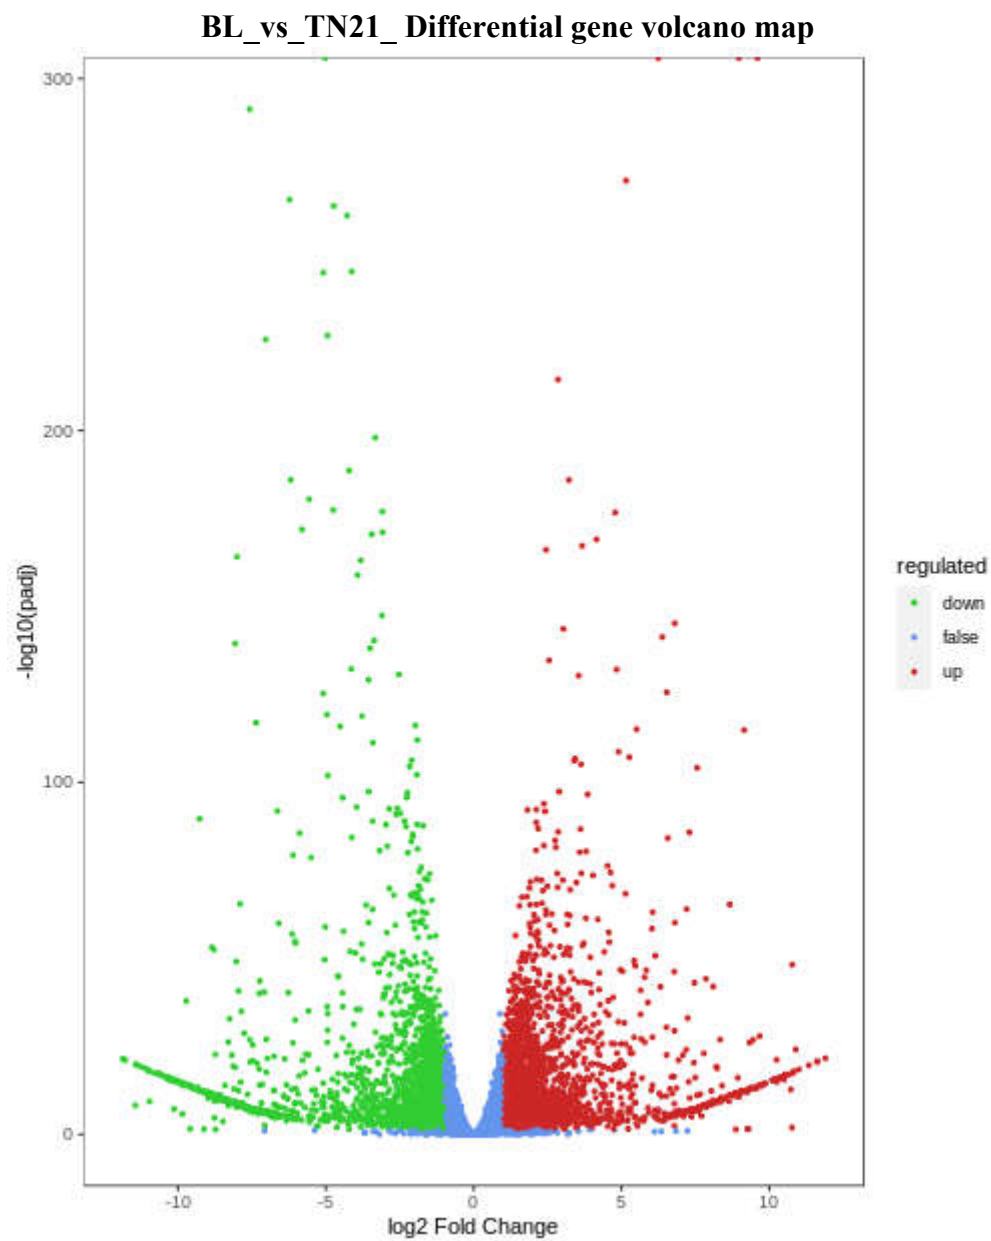

**Figure S3: The volcano graph of DEG between different pineapple species**

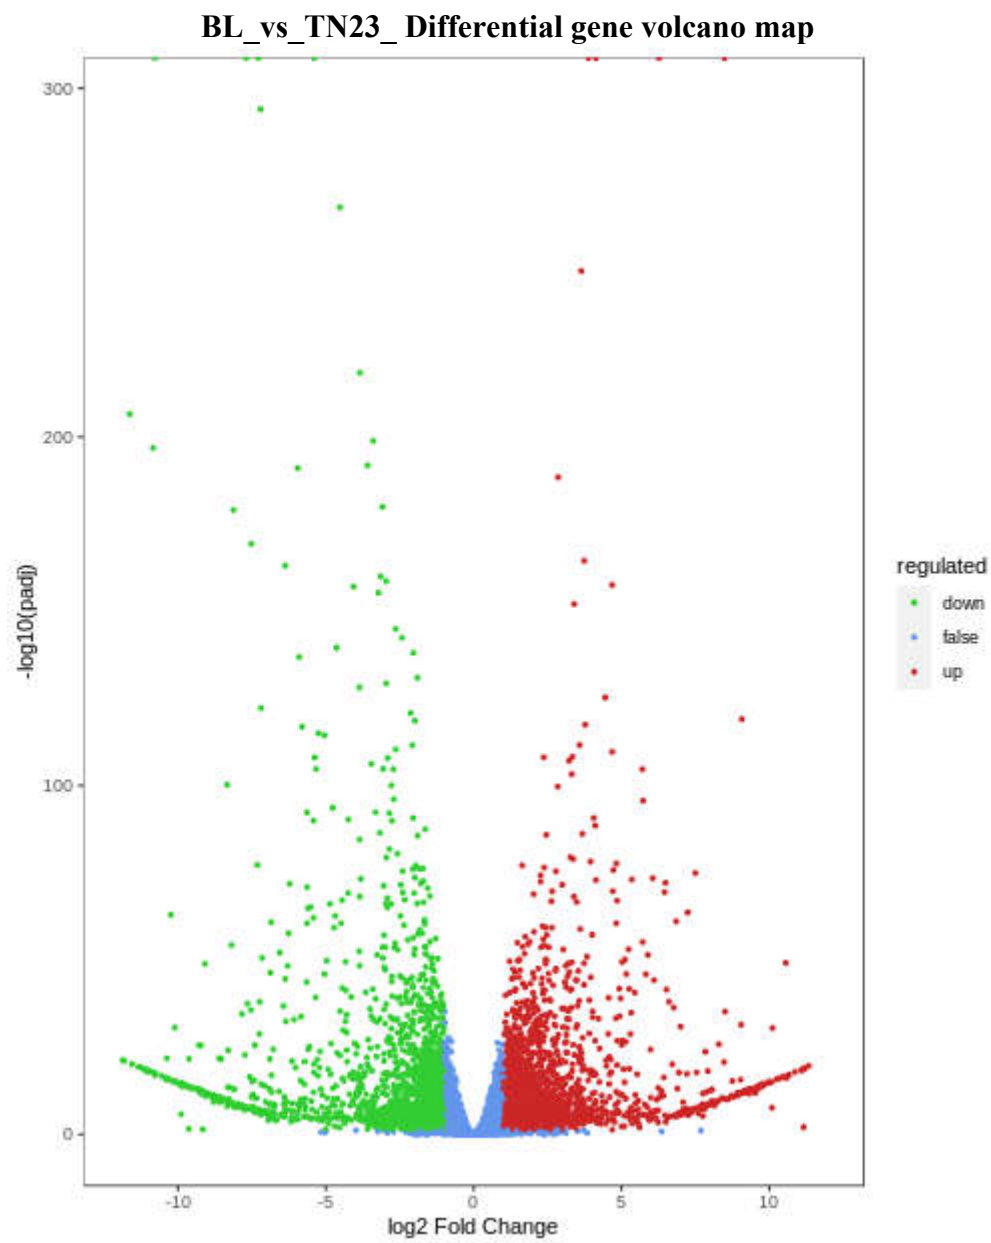

**Figure S3: The volcano graph of DEG between different pineapple species**

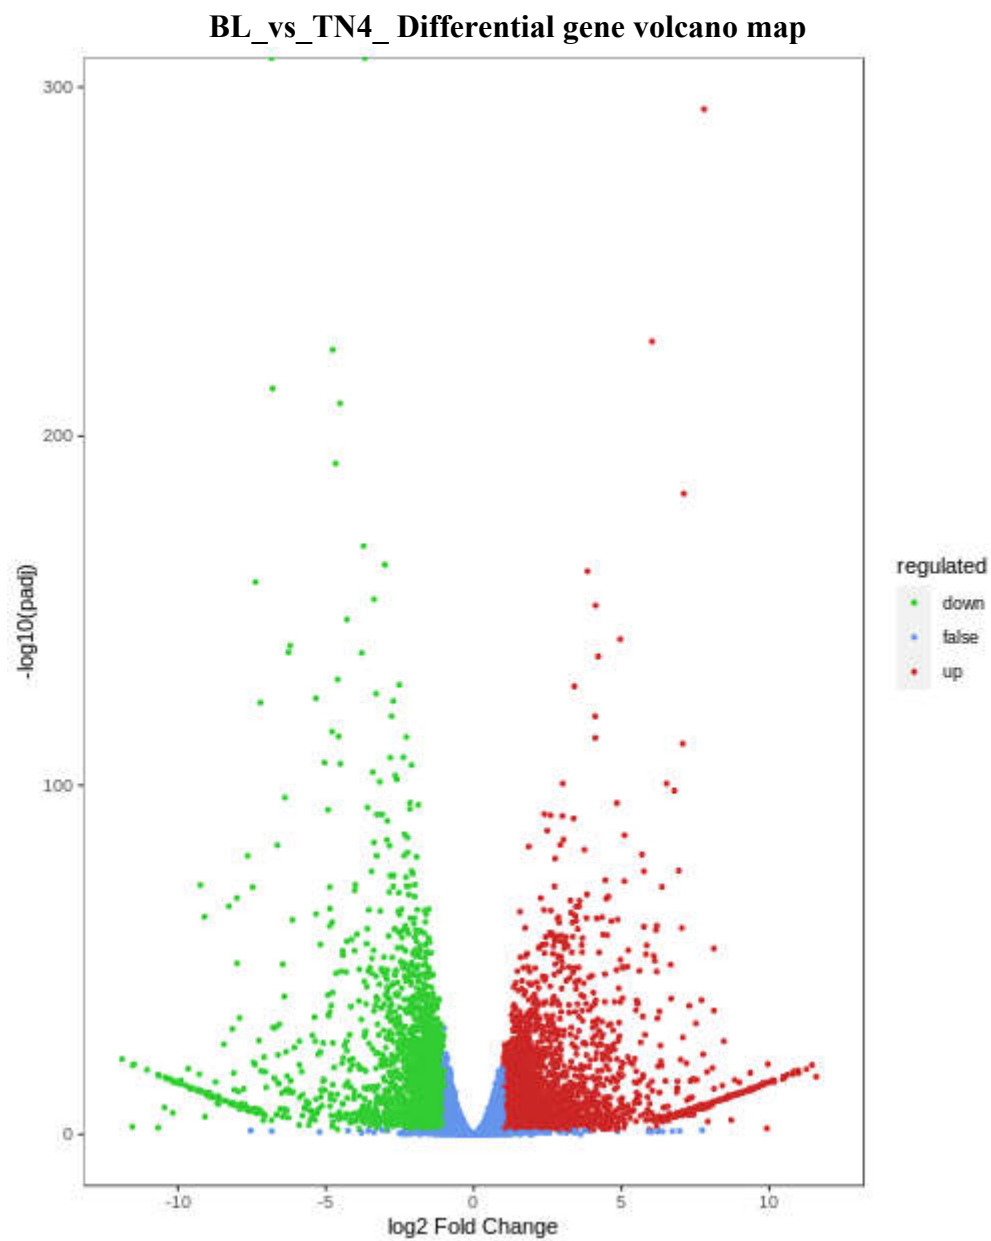

**Figure S3: The volcano graph of DEG between different pineapple species**

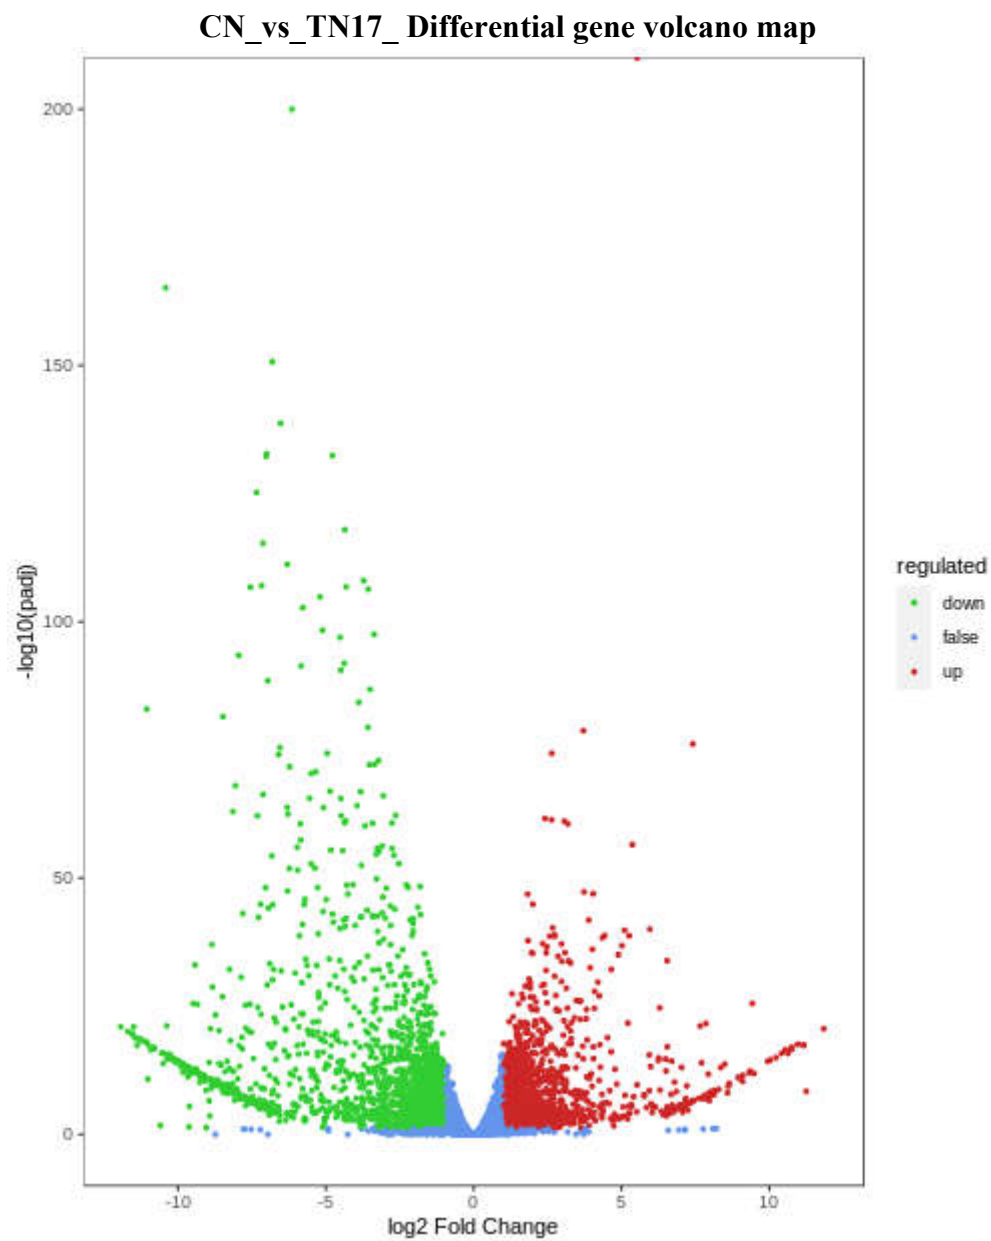

**Figure S3: The volcano graph of DEG between different pineapple species**

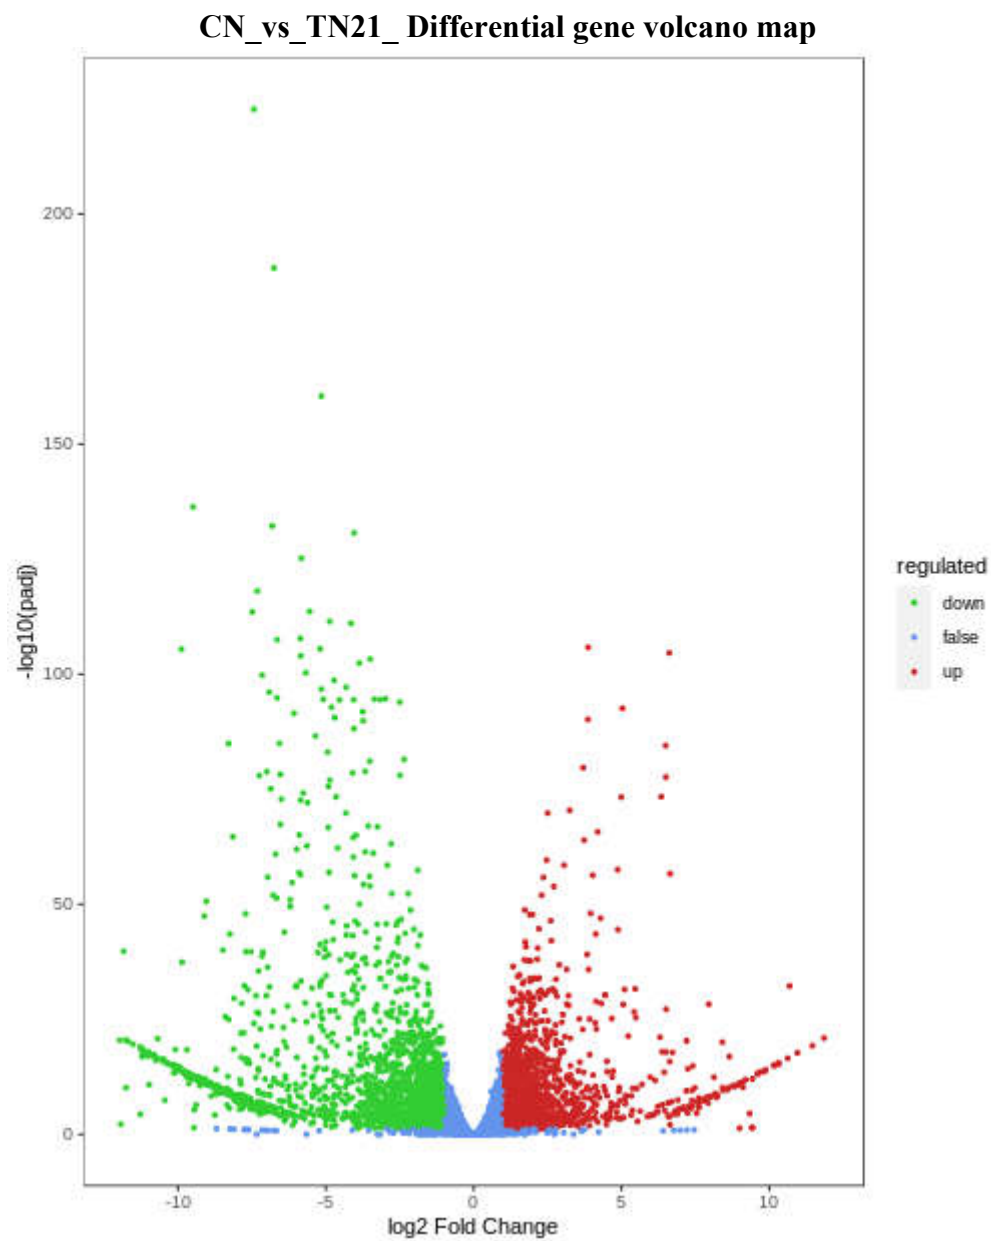

**Figure S3: The volcano graph of DEG between different pineapple species**

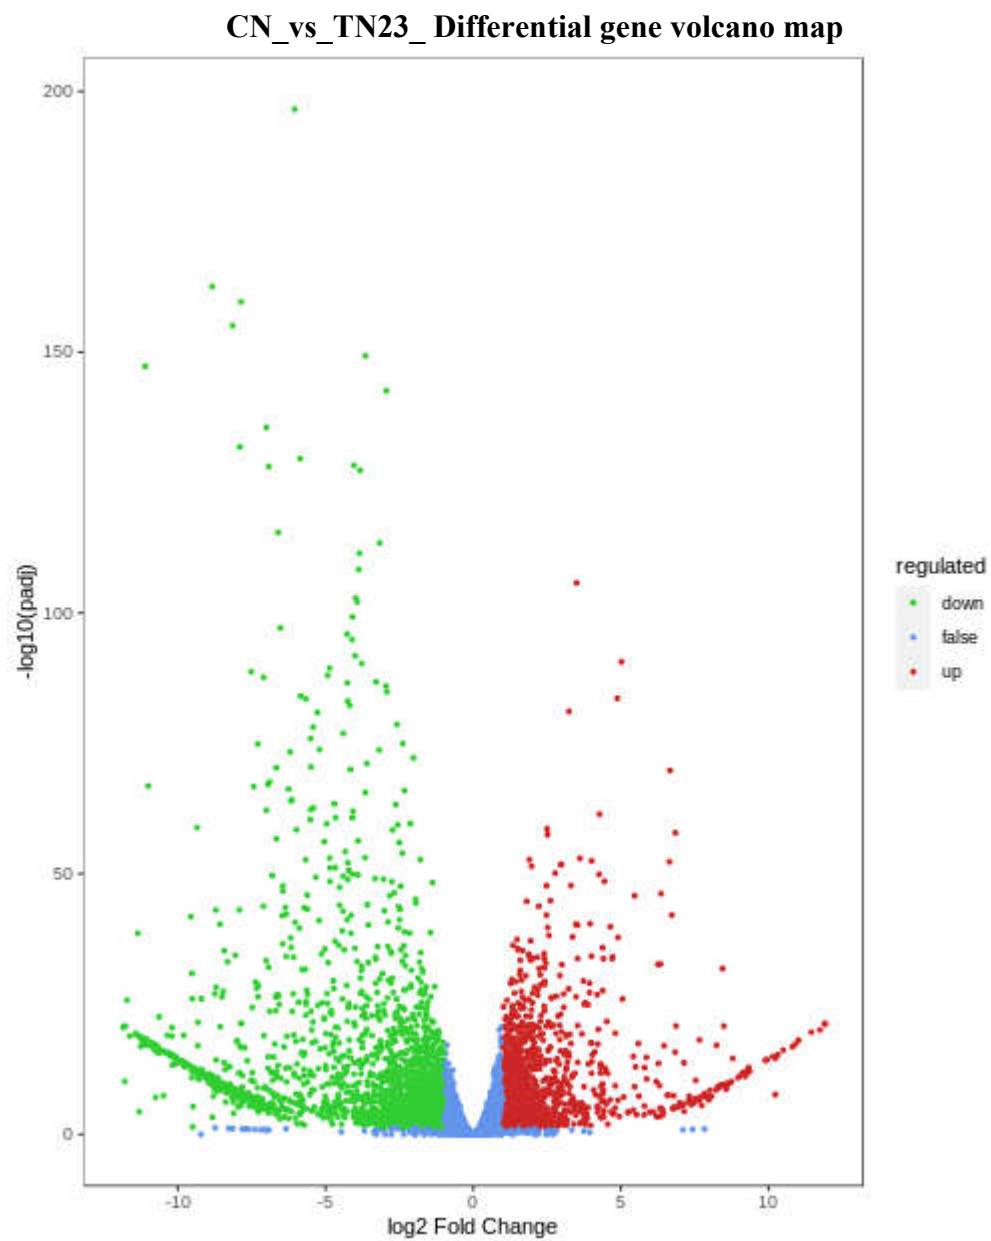



**Figure S3: The volcano graph of DEG between different pineapple species**

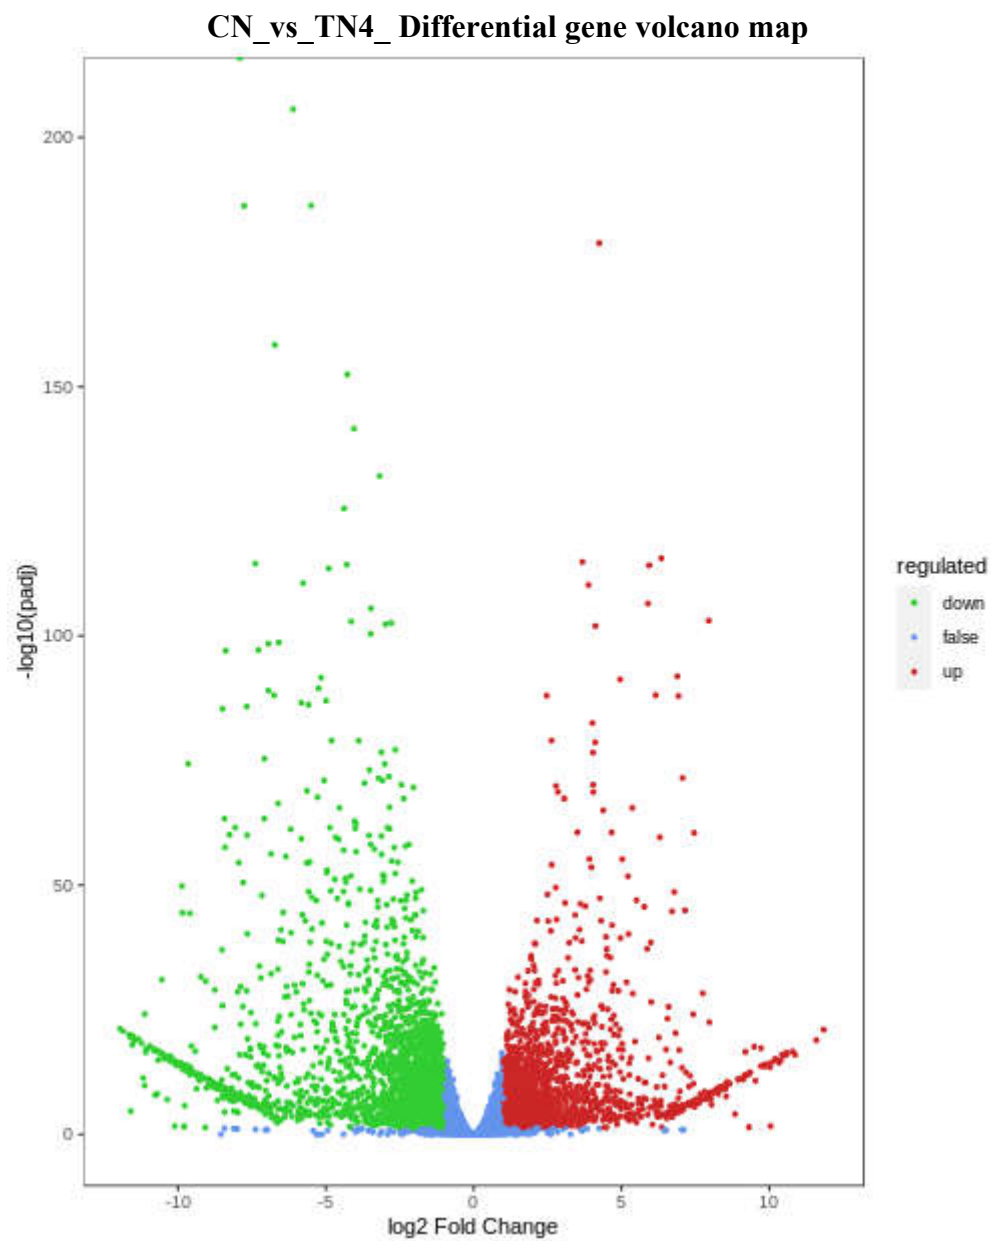

**Figure S3: The volcano graph of DEG between different pineapple species**

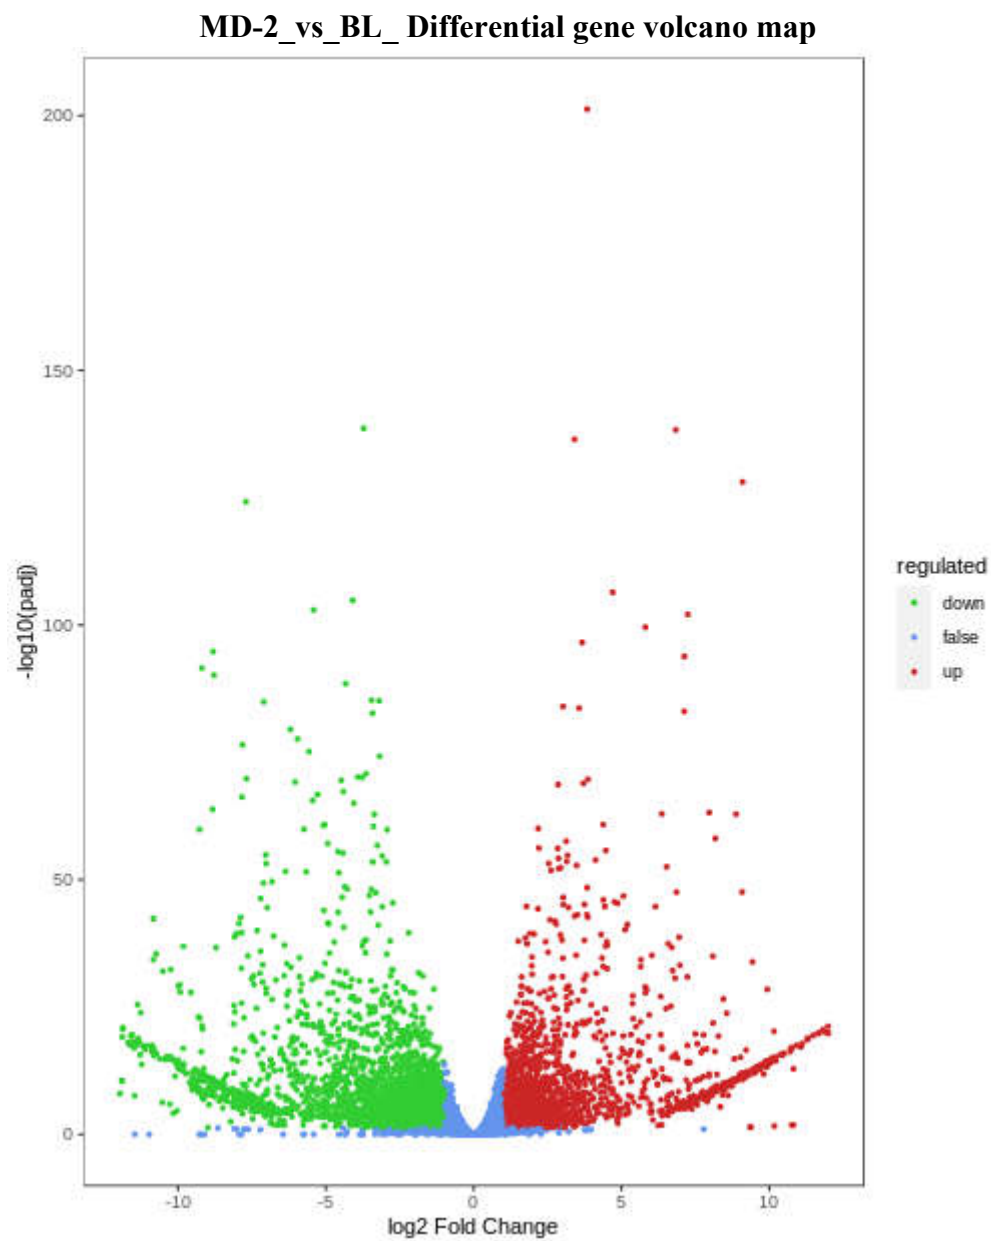

**Figure S3: The volcano graph of DEG between different pineapple species**

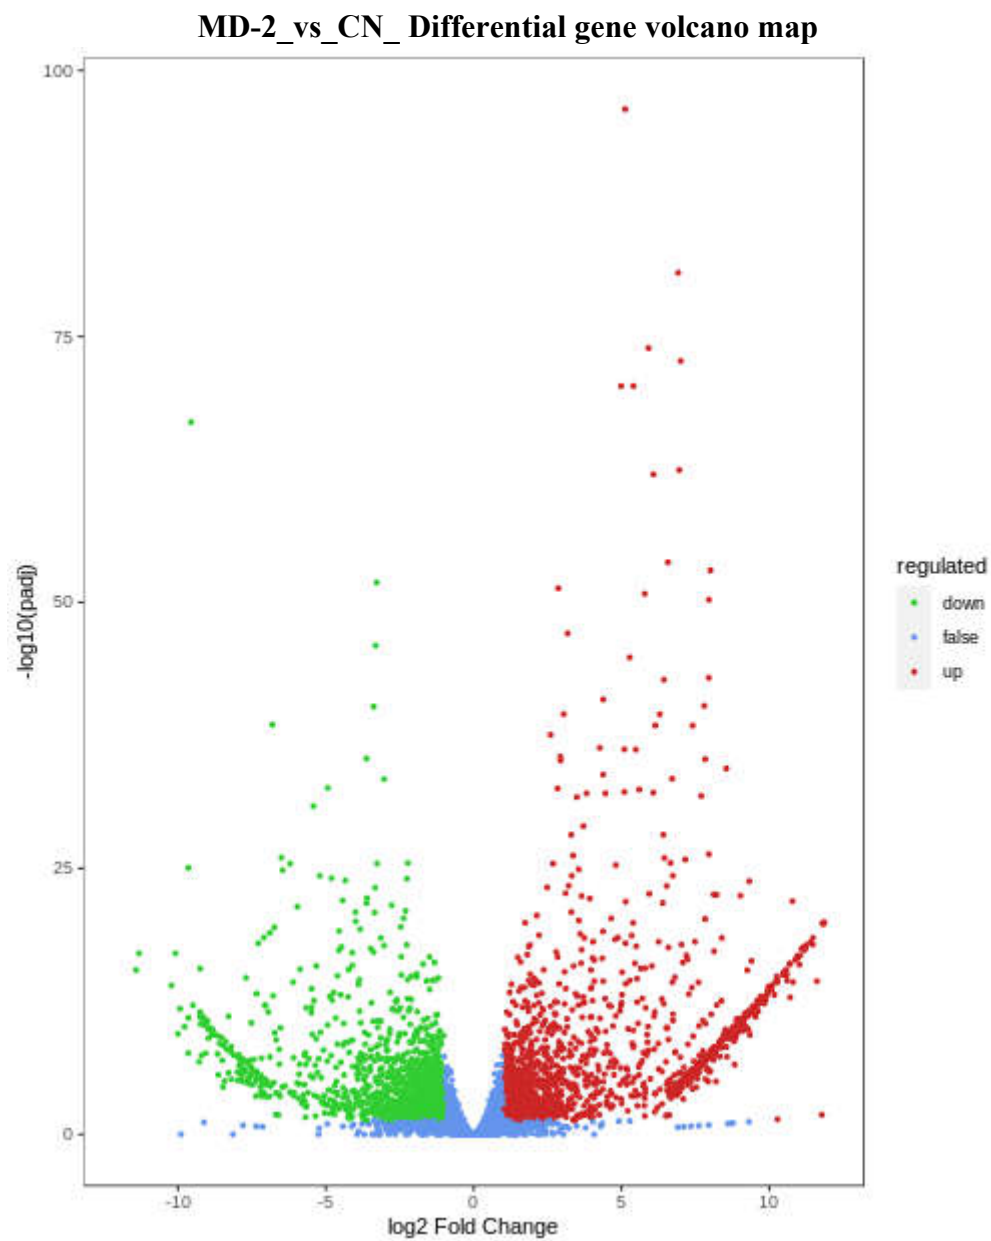

**Figure S3: The volcano graph of DEG between different pineapple species**

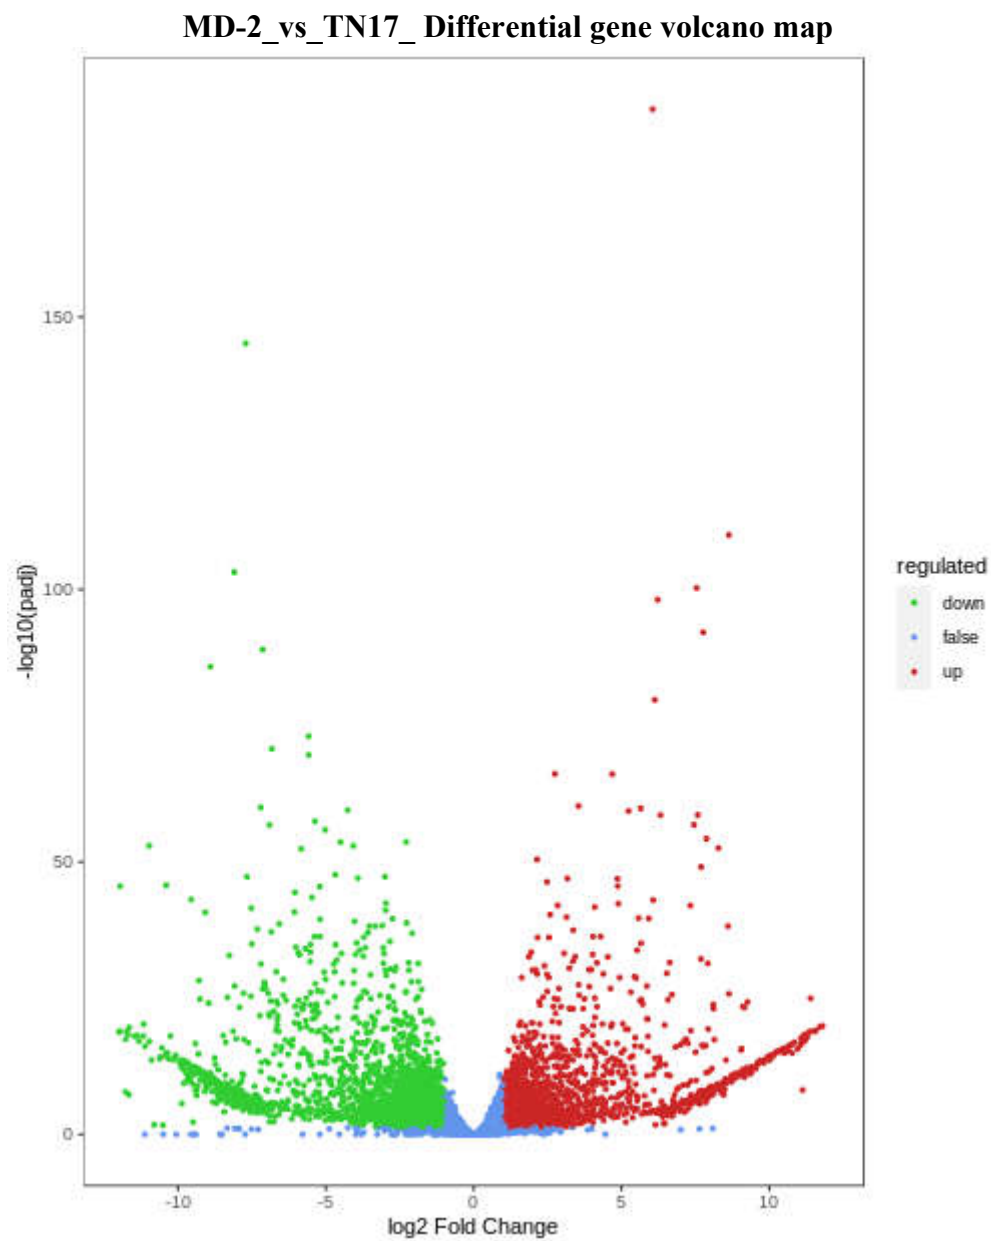

**Figure S3: The volcano graph of DEG between different pineapple species**

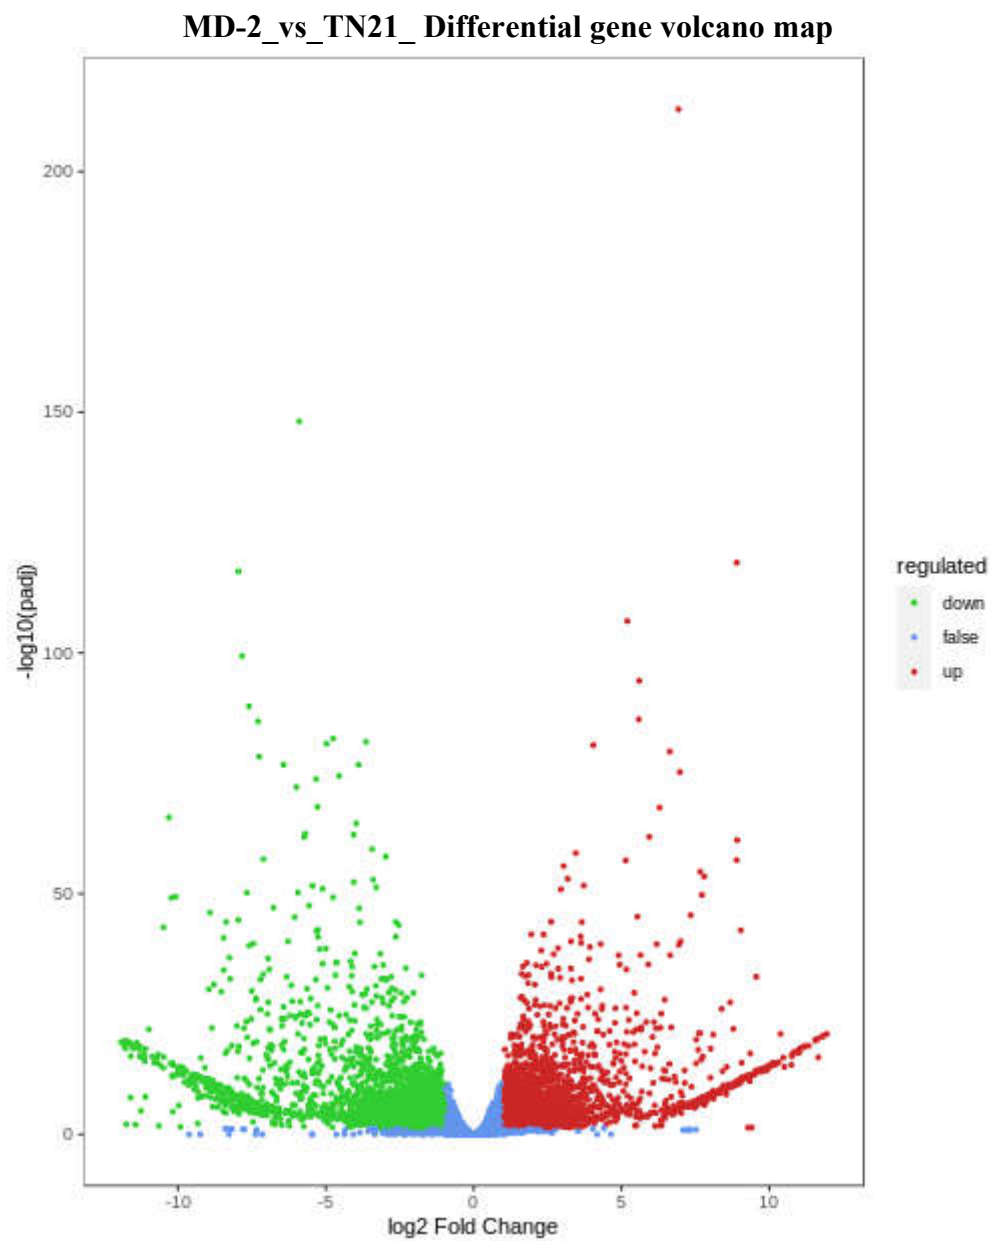

**Figure S3: The volcano graph of DEG between different pineapple species**

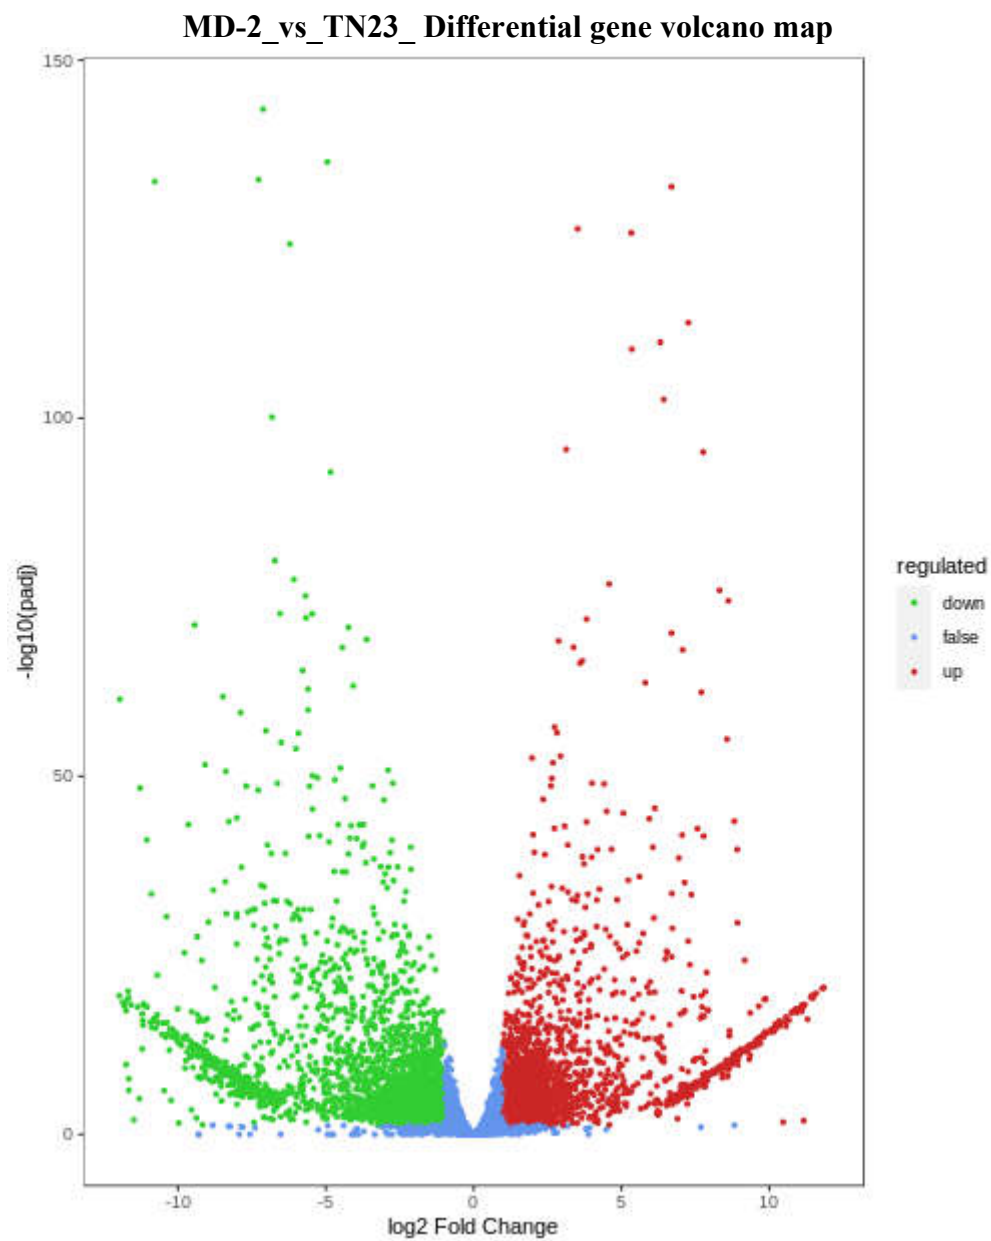

**Figure S3: The volcano graph of DEG between different pineapple species**

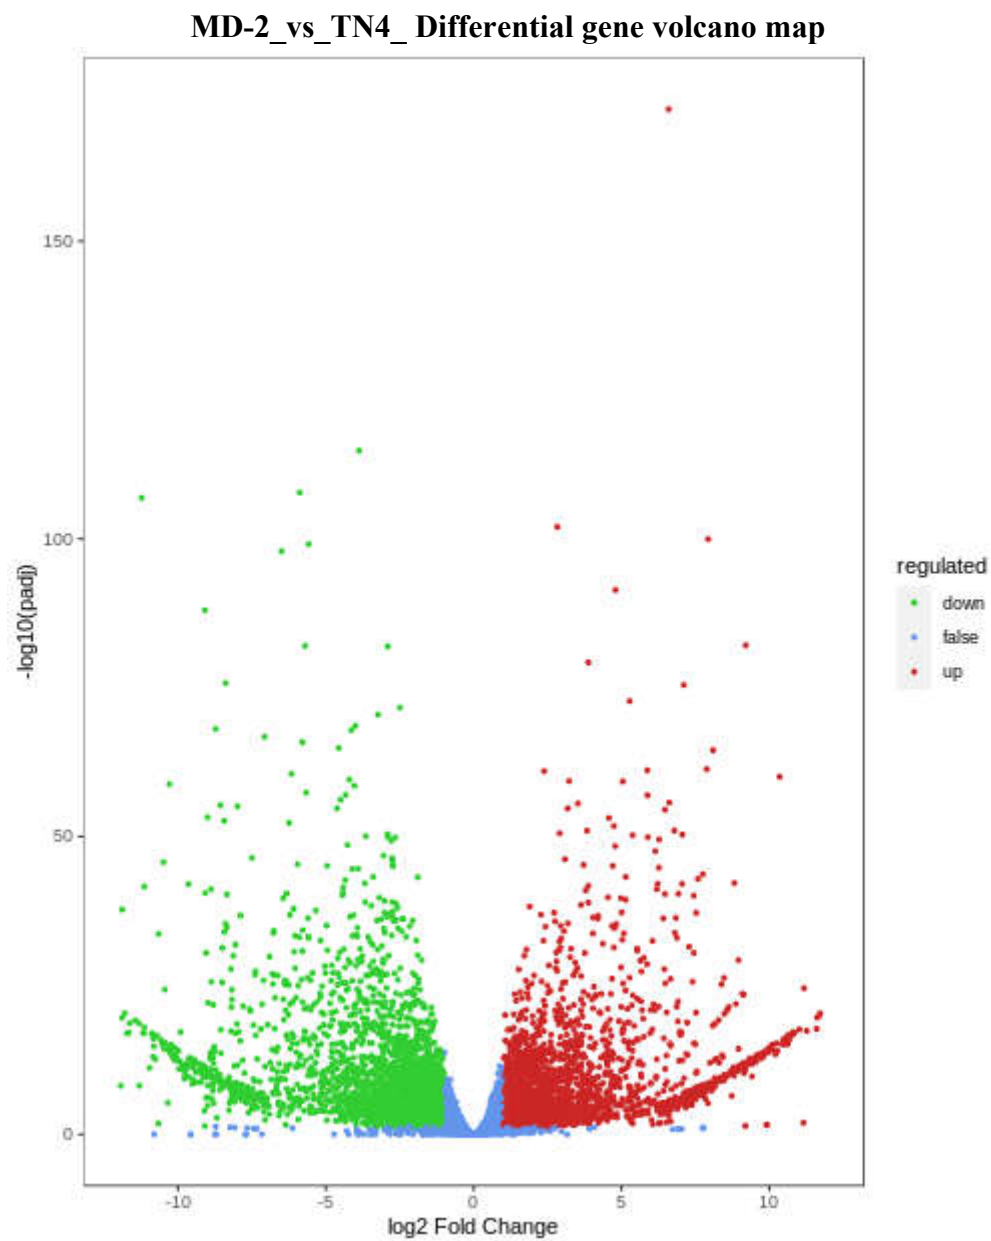

**Figure S3: The volcano graph of DEG between different pineapple species**

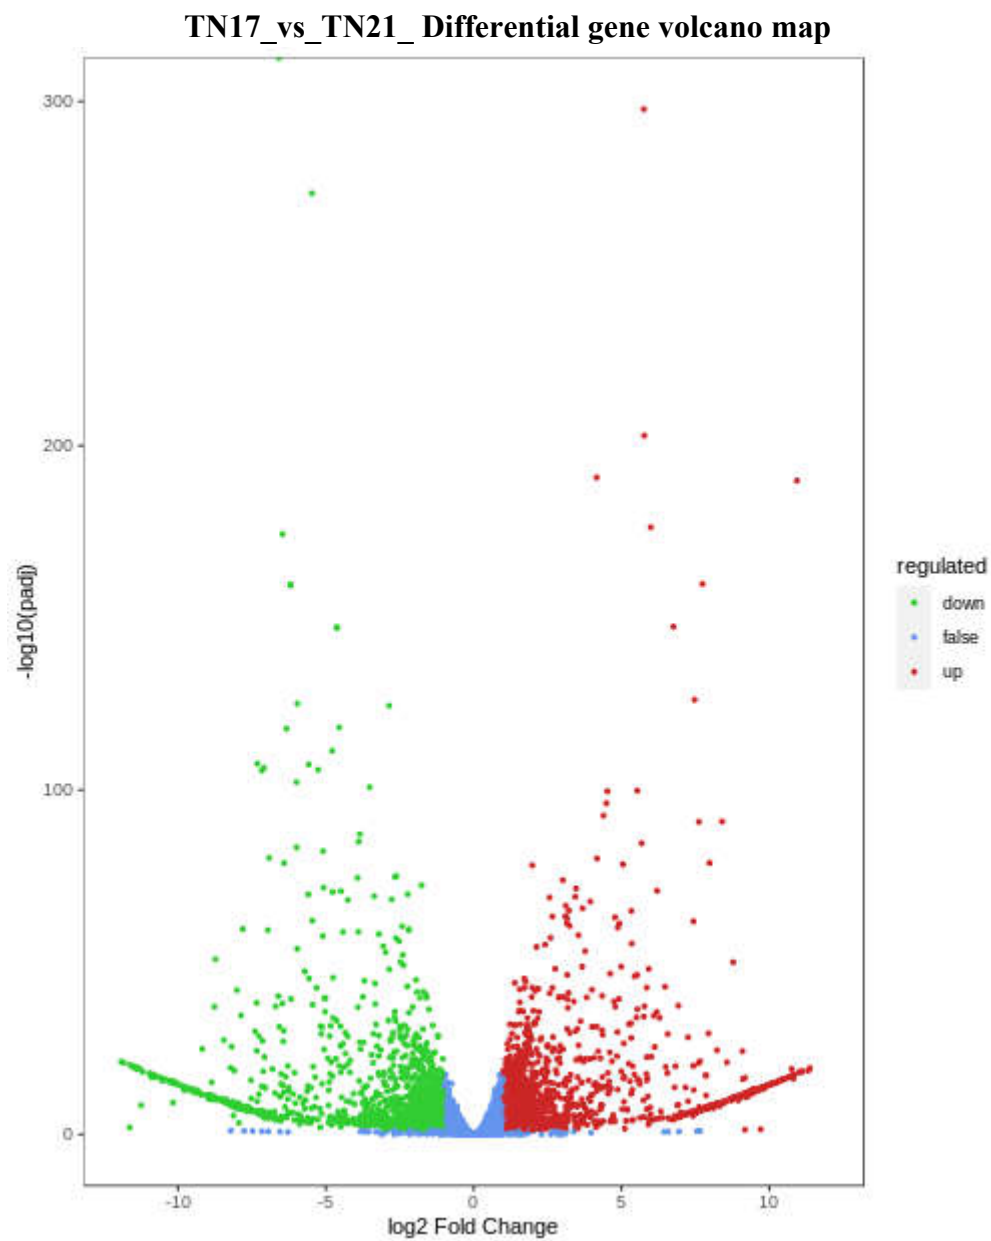



**Figure S3: The volcano graph of DEG between different pineapple species**

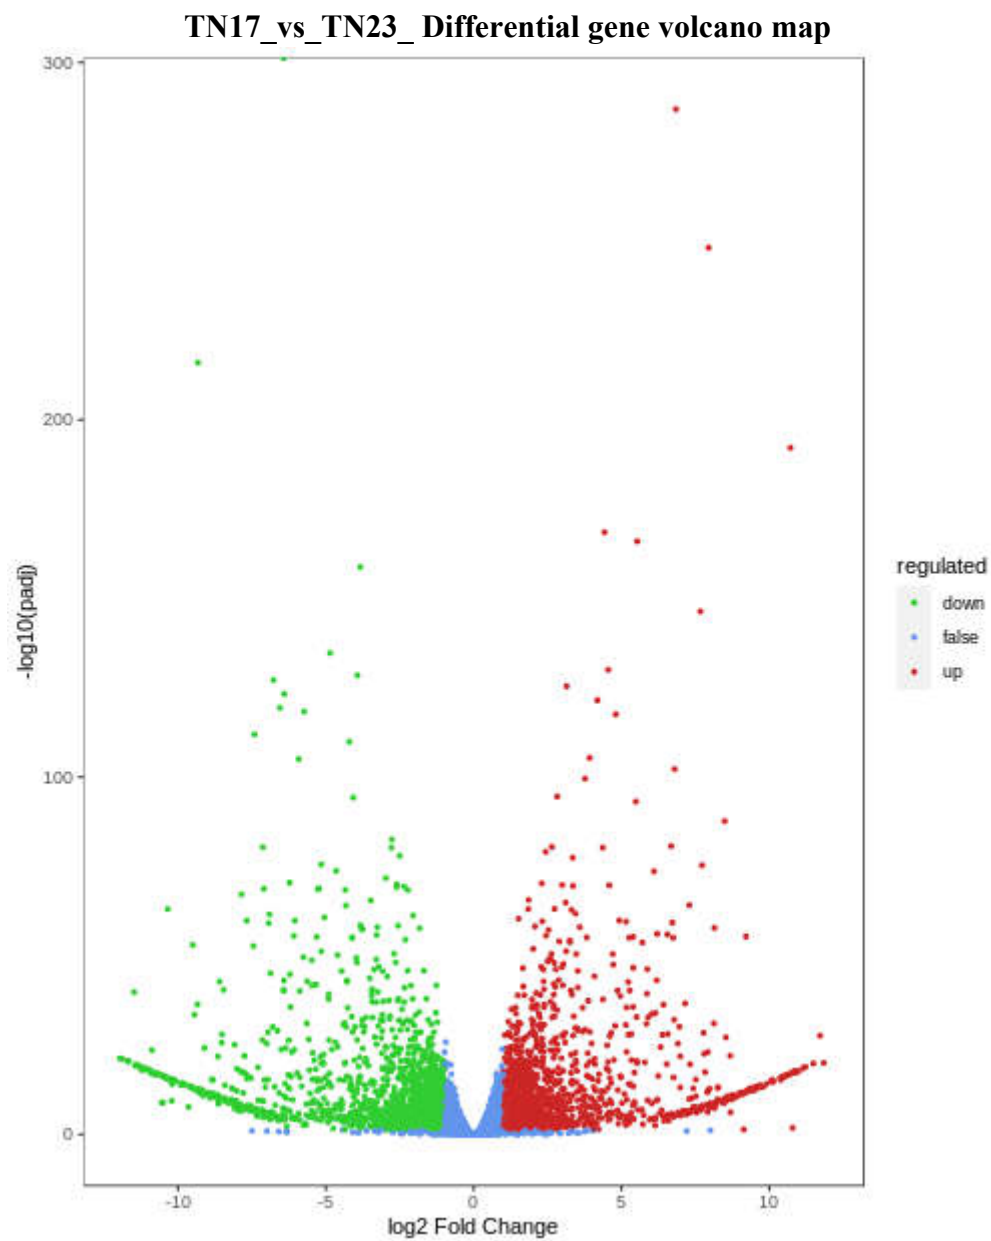

**Figure S3: The volcano graph of DEG between different pineapple species**

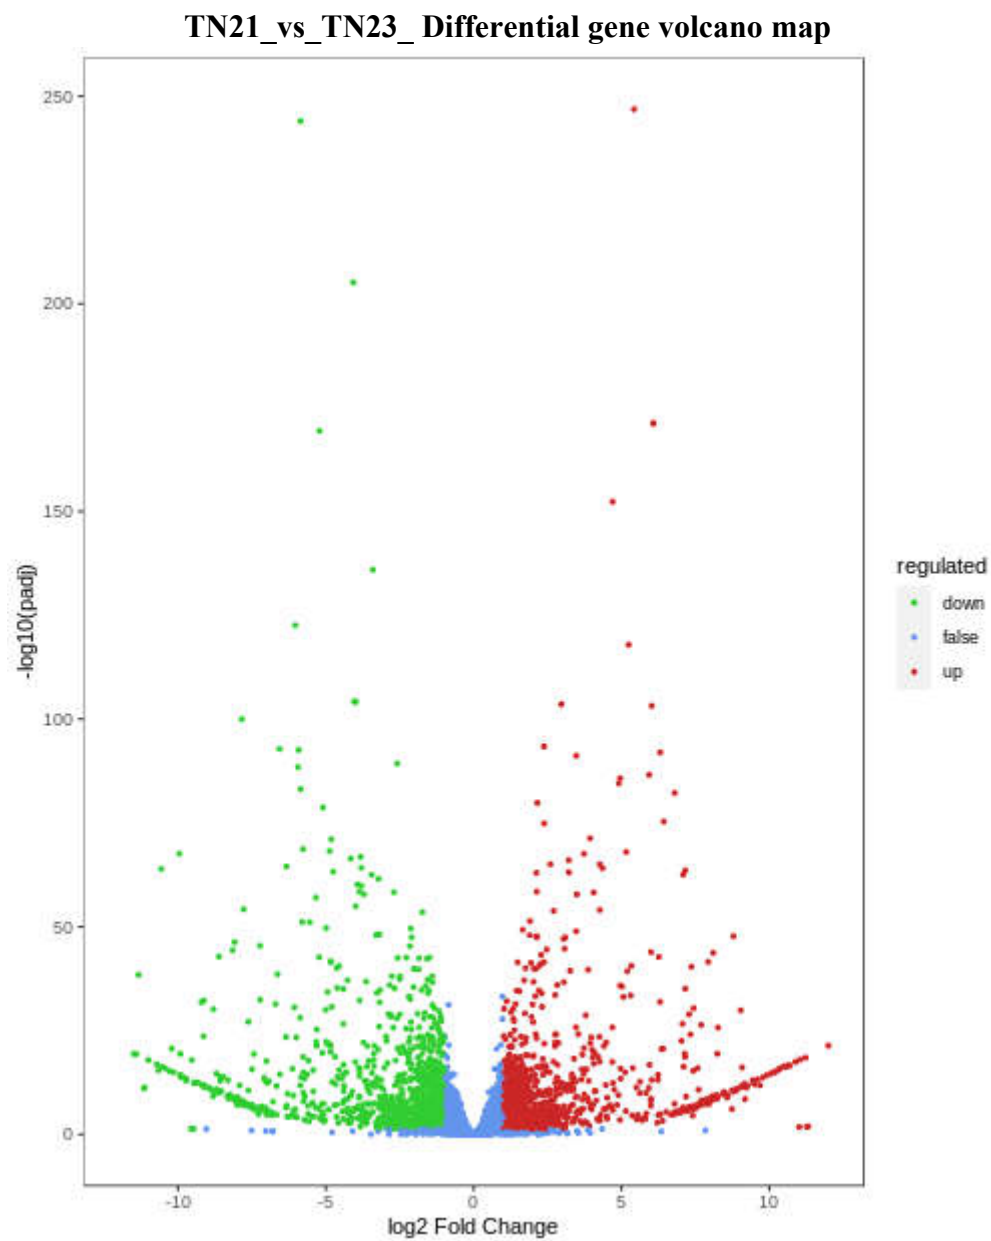

**Figure S3: The volcano graph of DEG between different pineapple species**

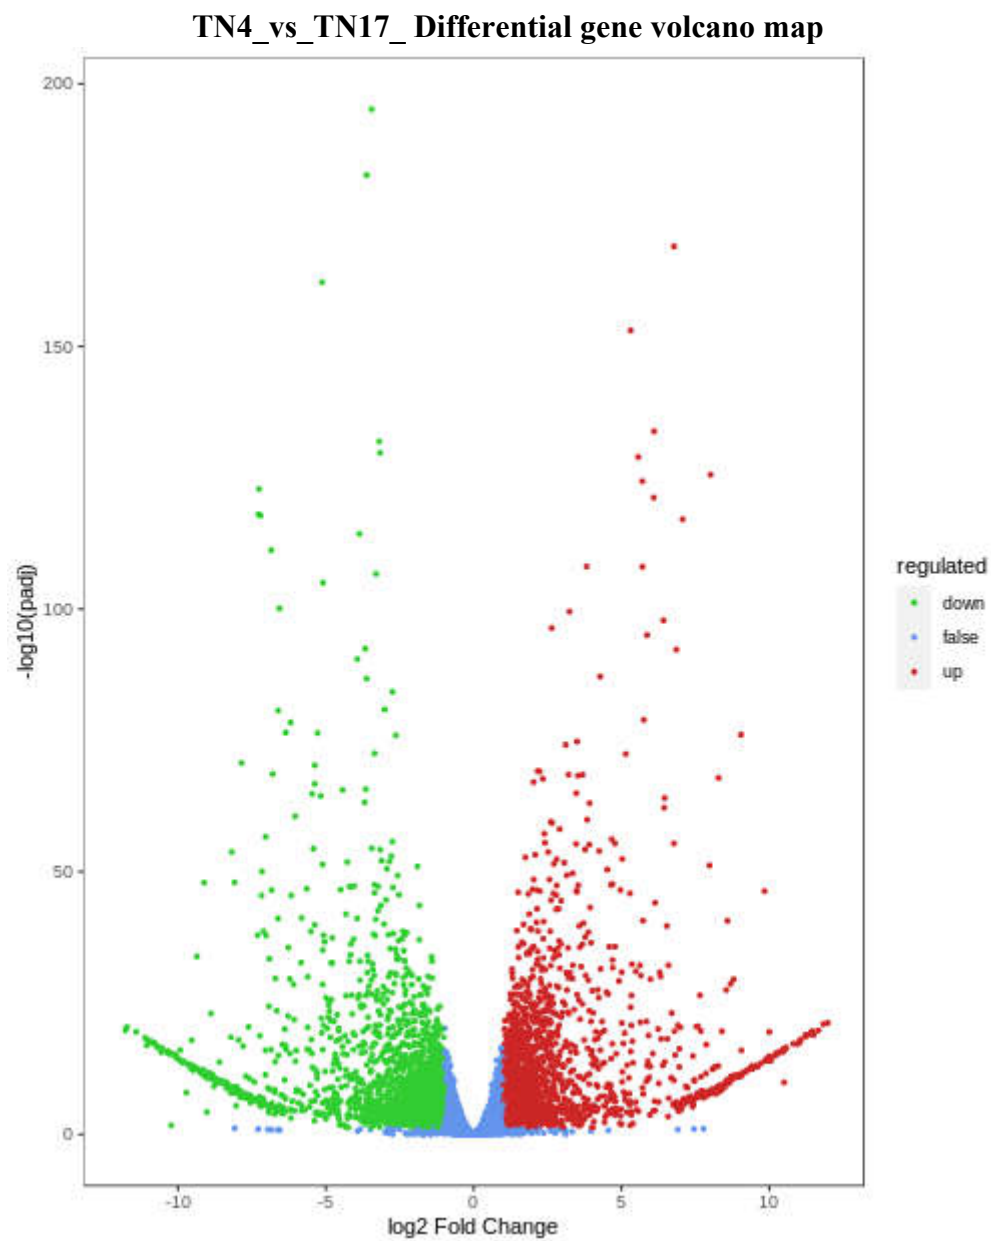

**Figure S3: The volcano graph of DEG between different pineapple species**

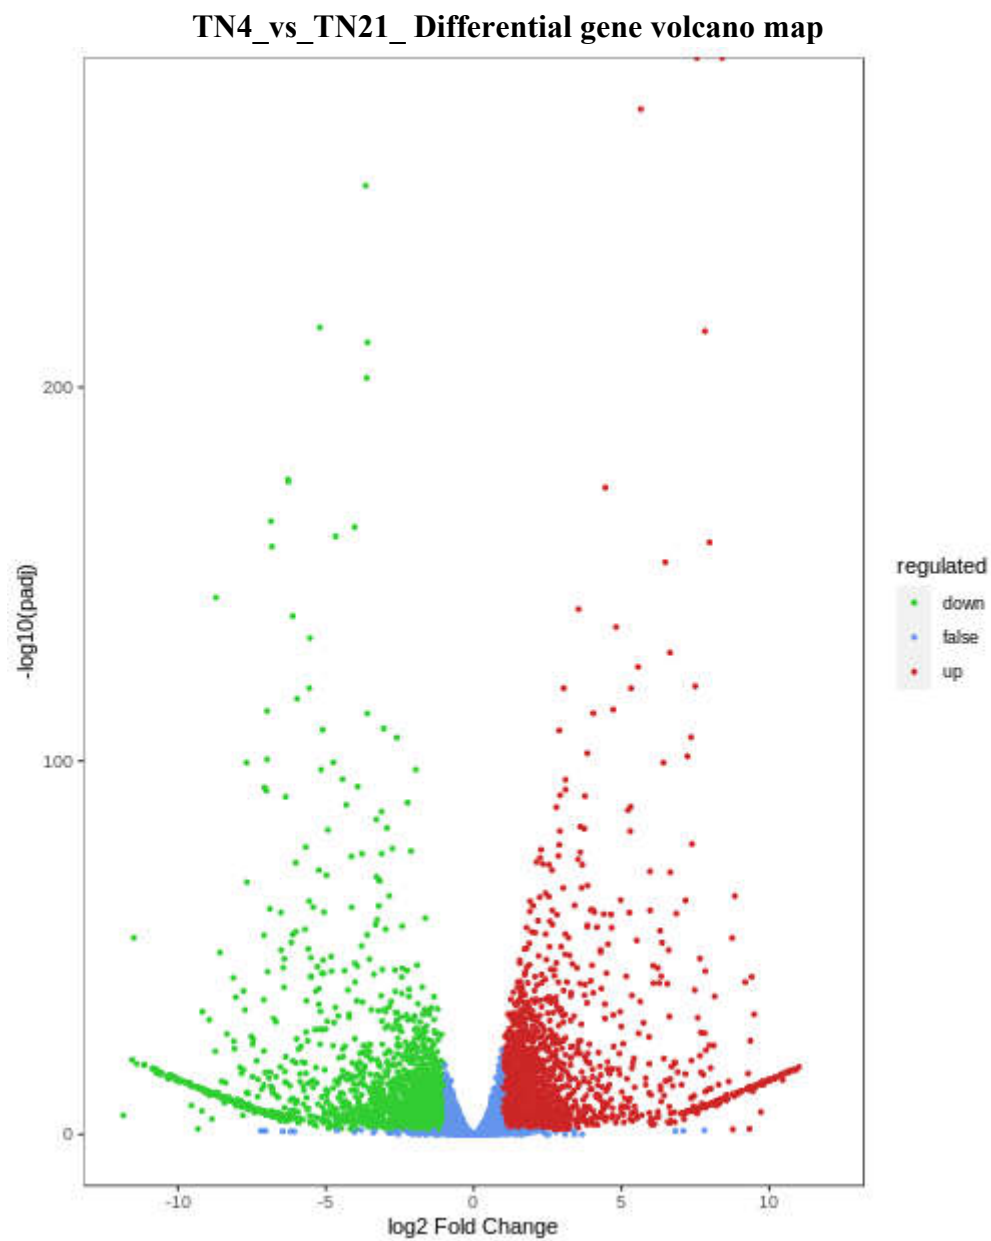

**Figure S3: The volcano graph of DEG between different pineapple species**

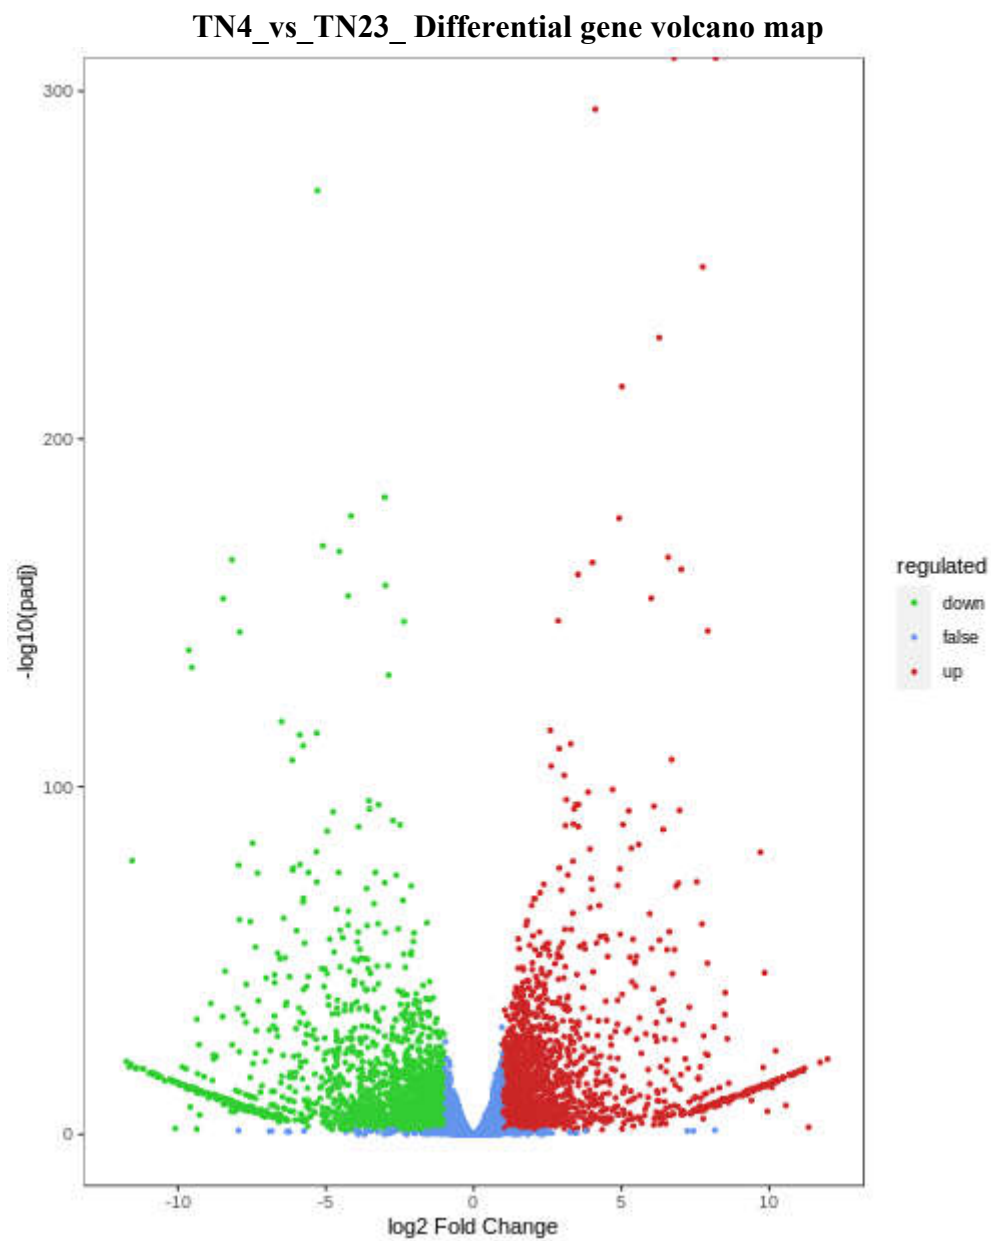

Supplement: s1 [file s1]
