# Supplementary material for: Integrated Metabolome and Transcriptome Analysis Reveals a Potential Mechanism for Water Accumulation Mediated Translucency in Pineapple (Ananas comosus (L.) Merr.) Fruit
Source: MDPI journal article supplement (doi:10.3390/ijms24087199), 2023-04-13

Figure S4: The GO classification of DEG between different pineapple species

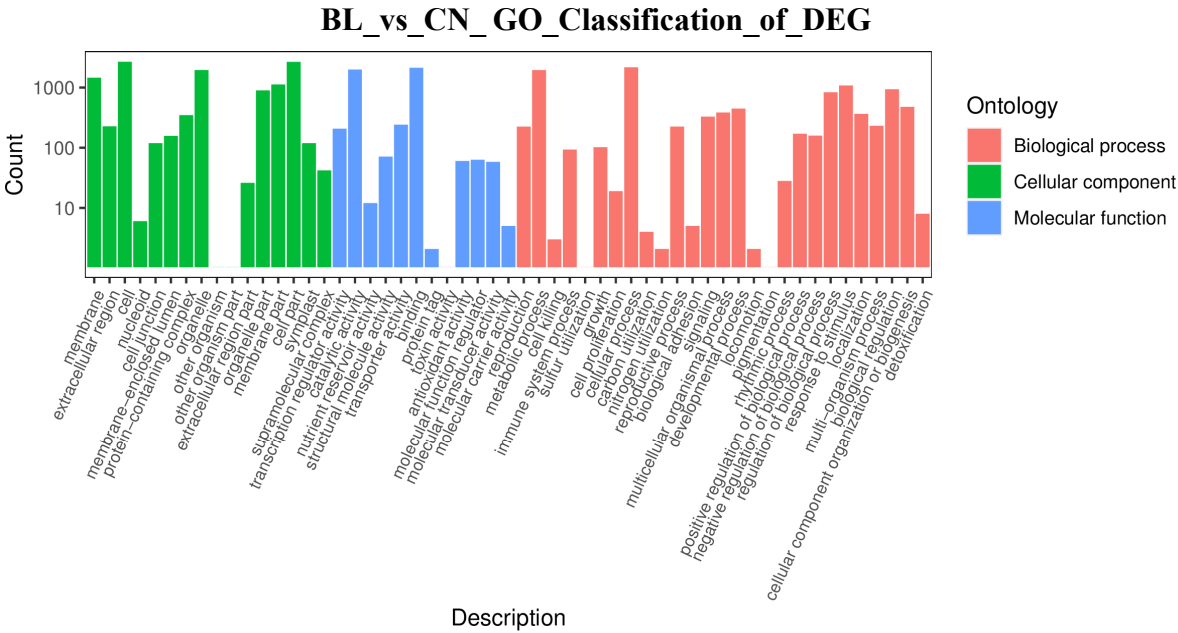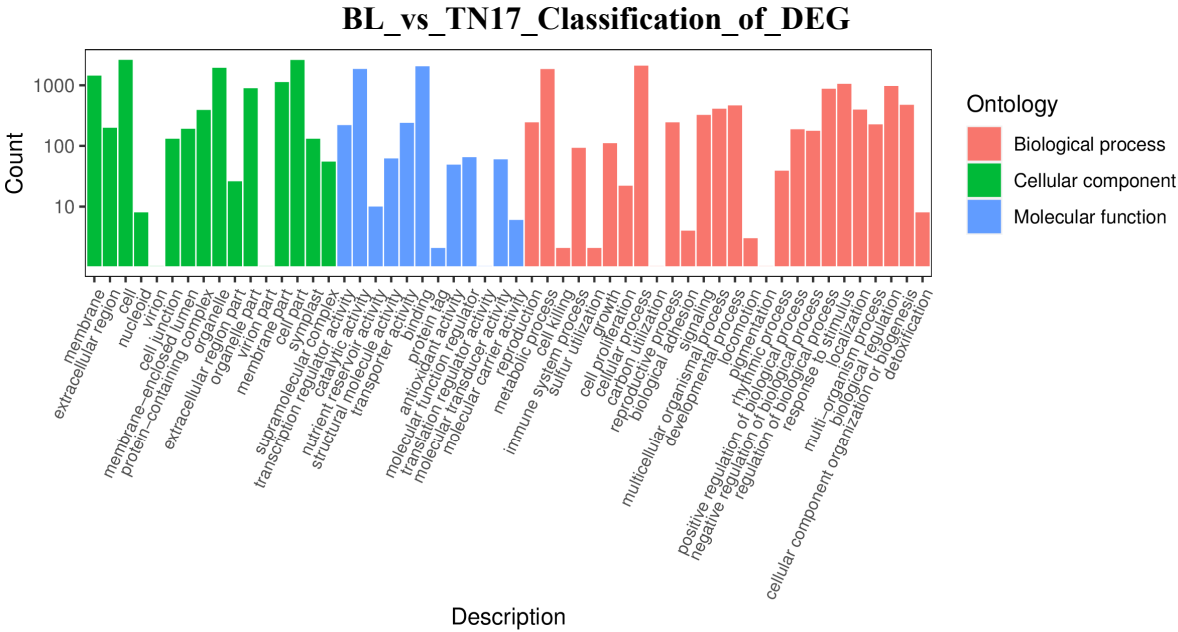

Figure S4: The GO classification of DEG between different pineapple species

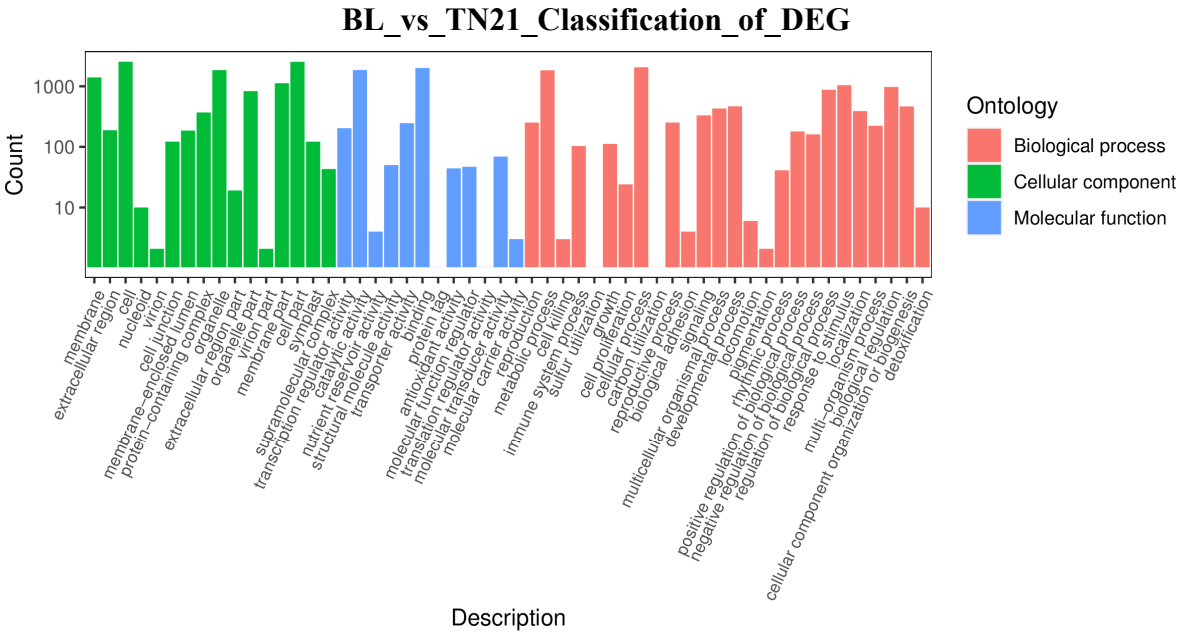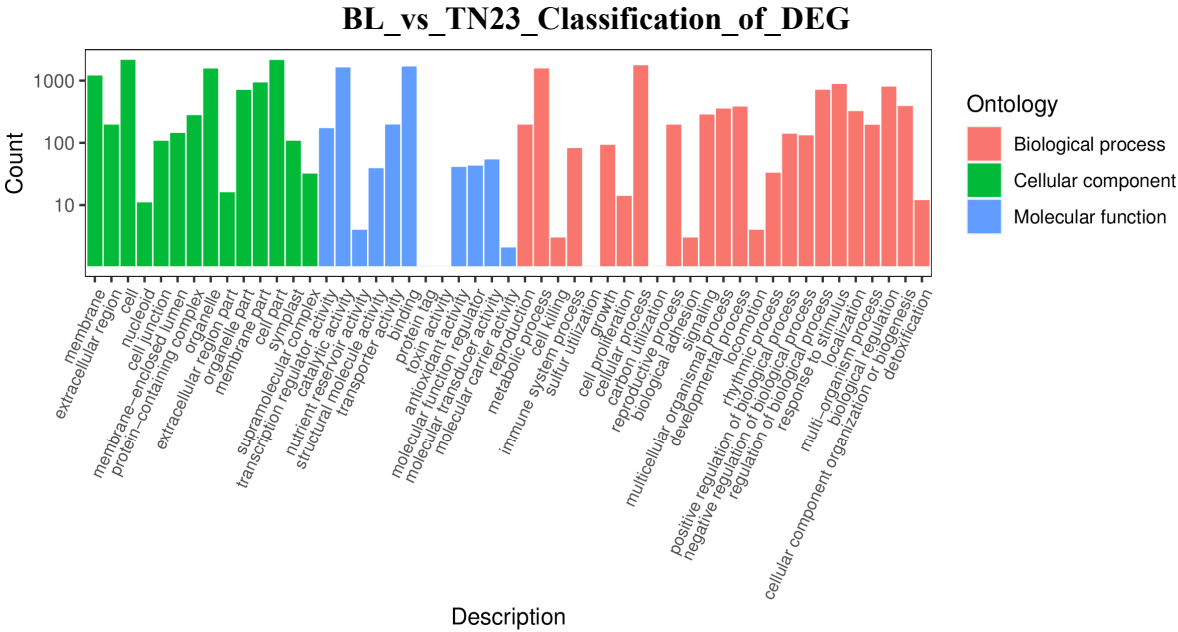

Figure S4: The GO classification of DEG between different pineapple species

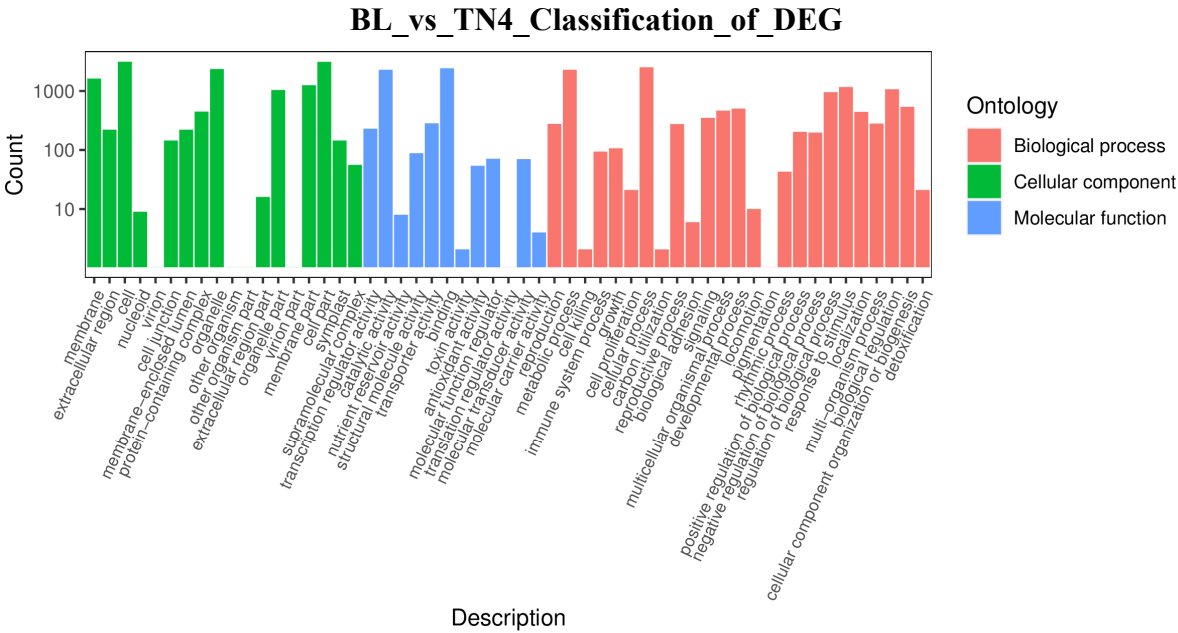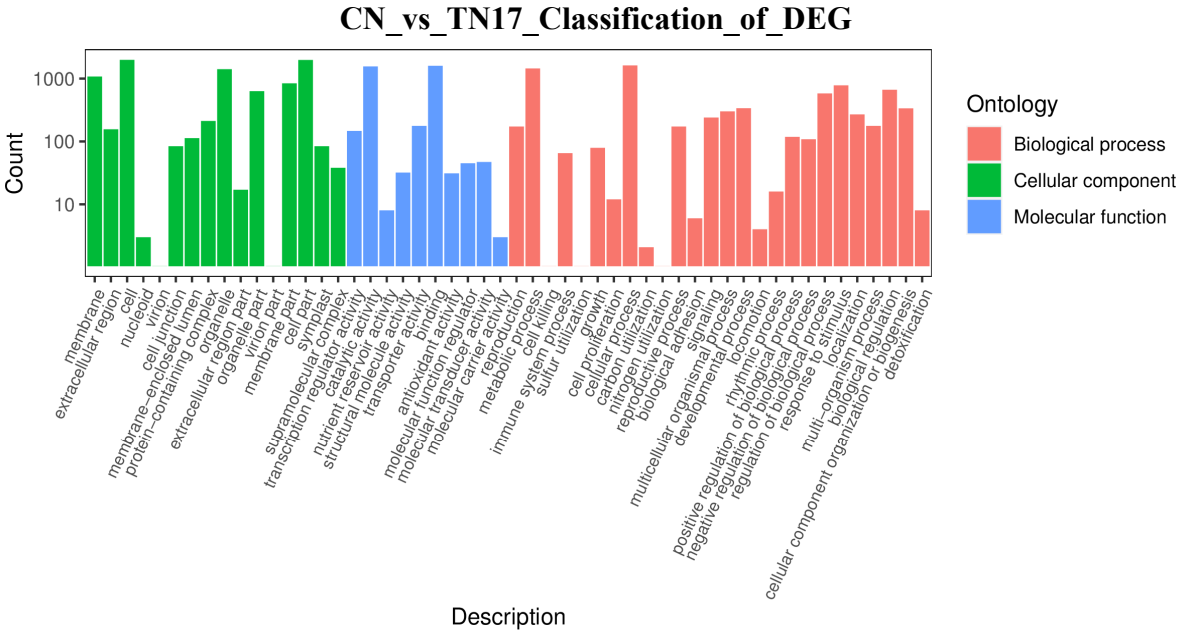

Figure S4: The GO classification of DEG between different pineapple species

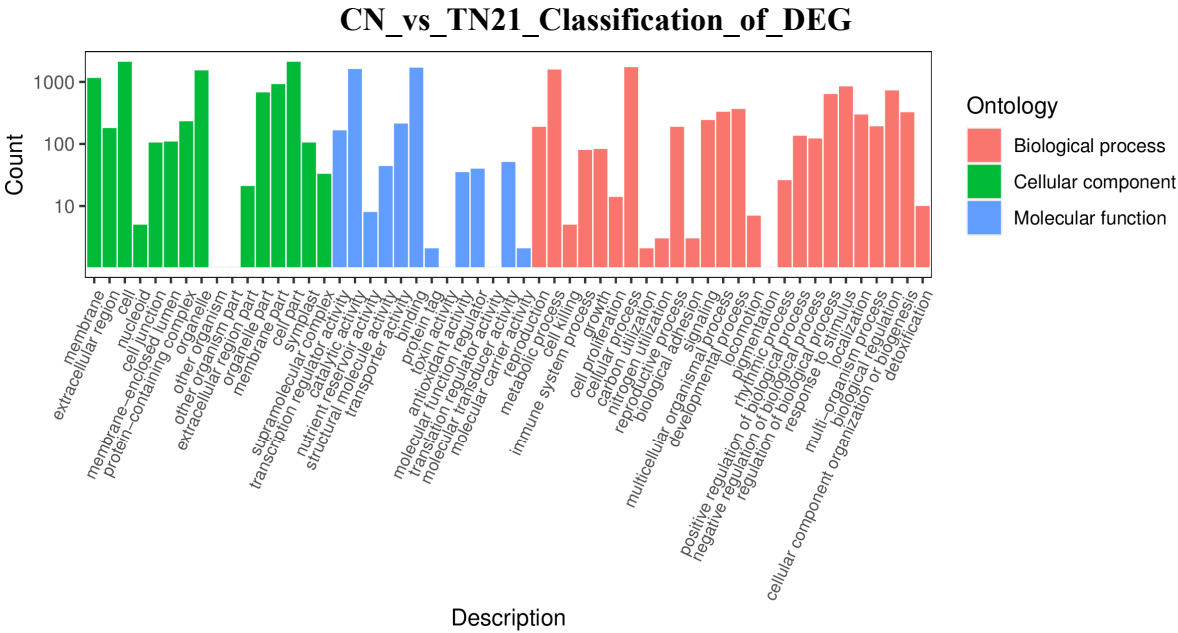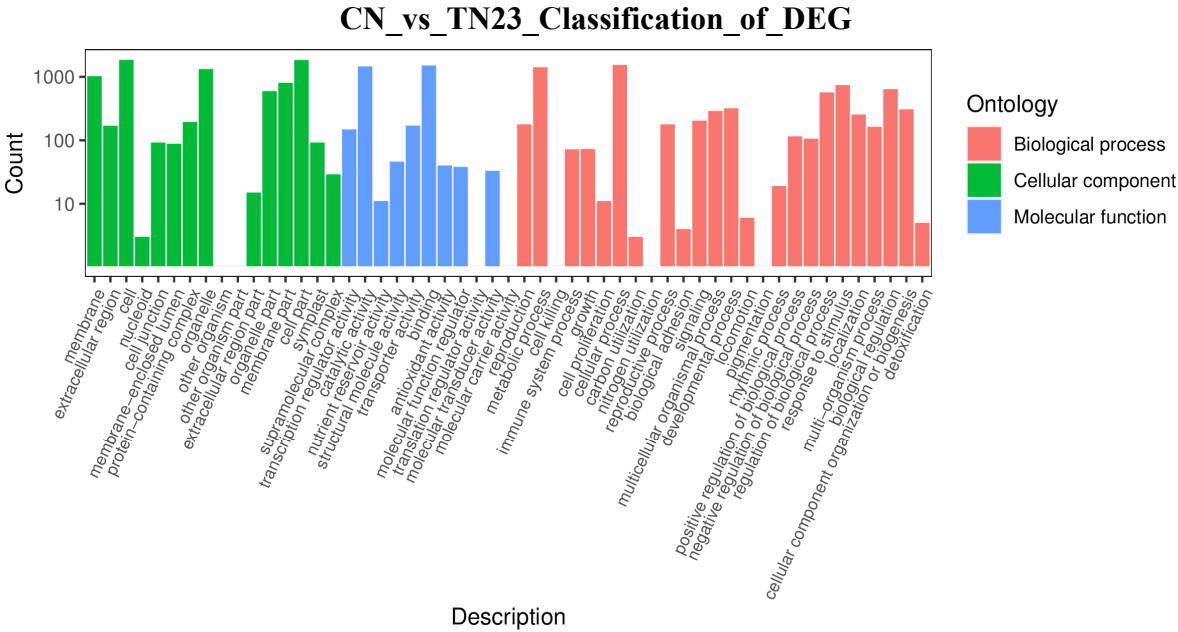

Figure S4: The GO classification of DEG between different pineapple species

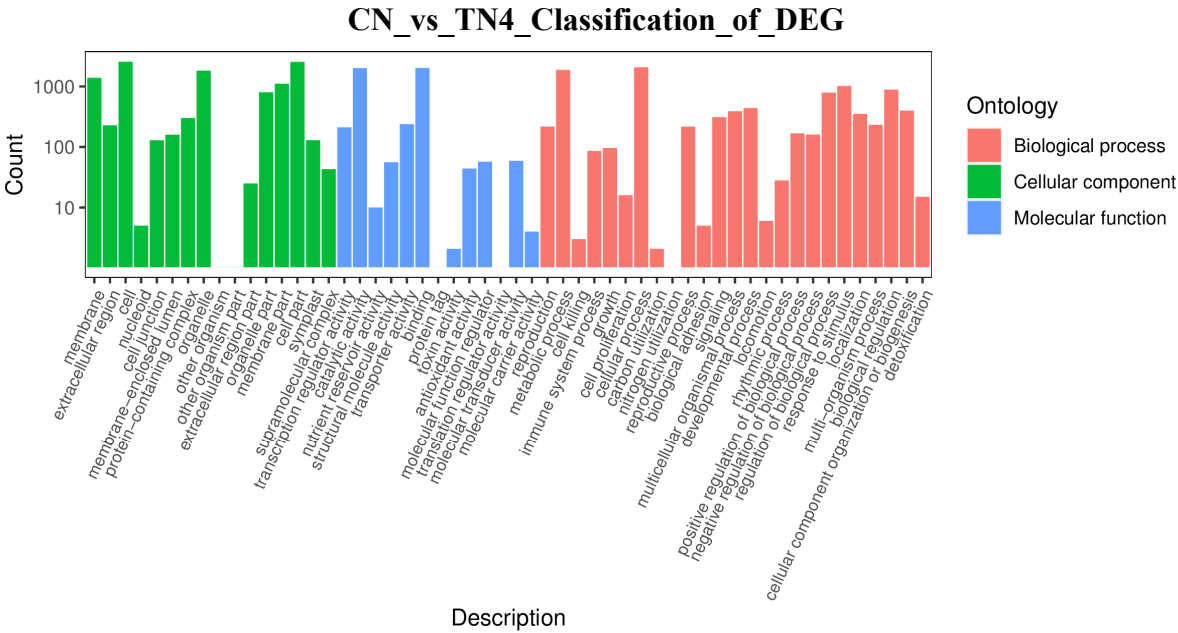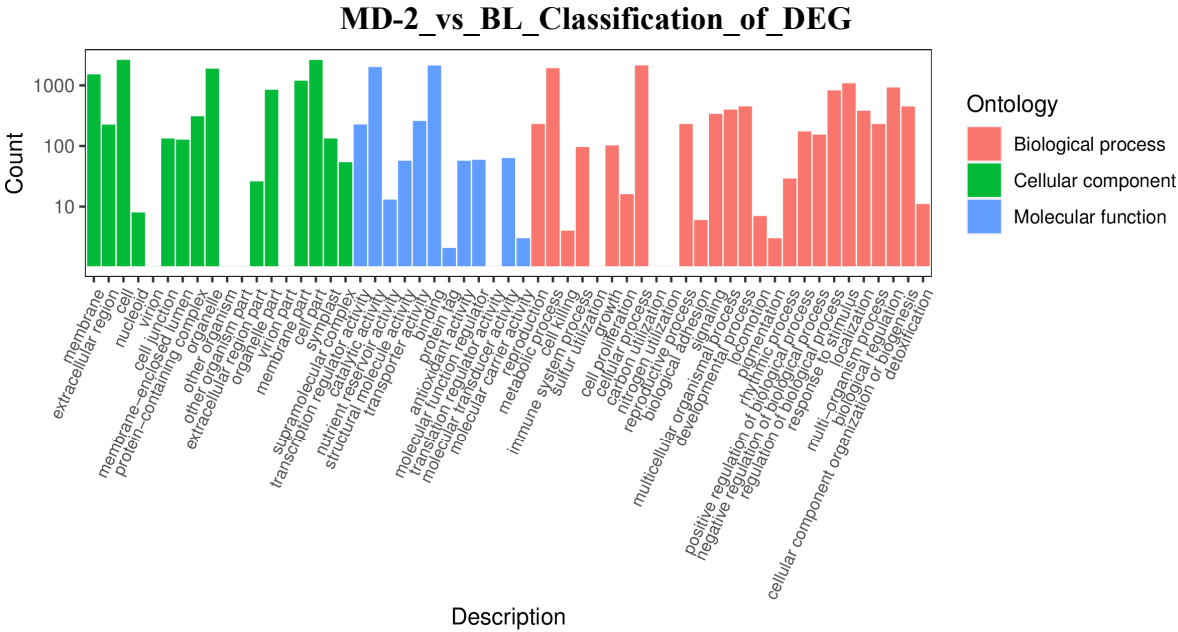

Figure S4: The GO classification of DEG between different pineapple species

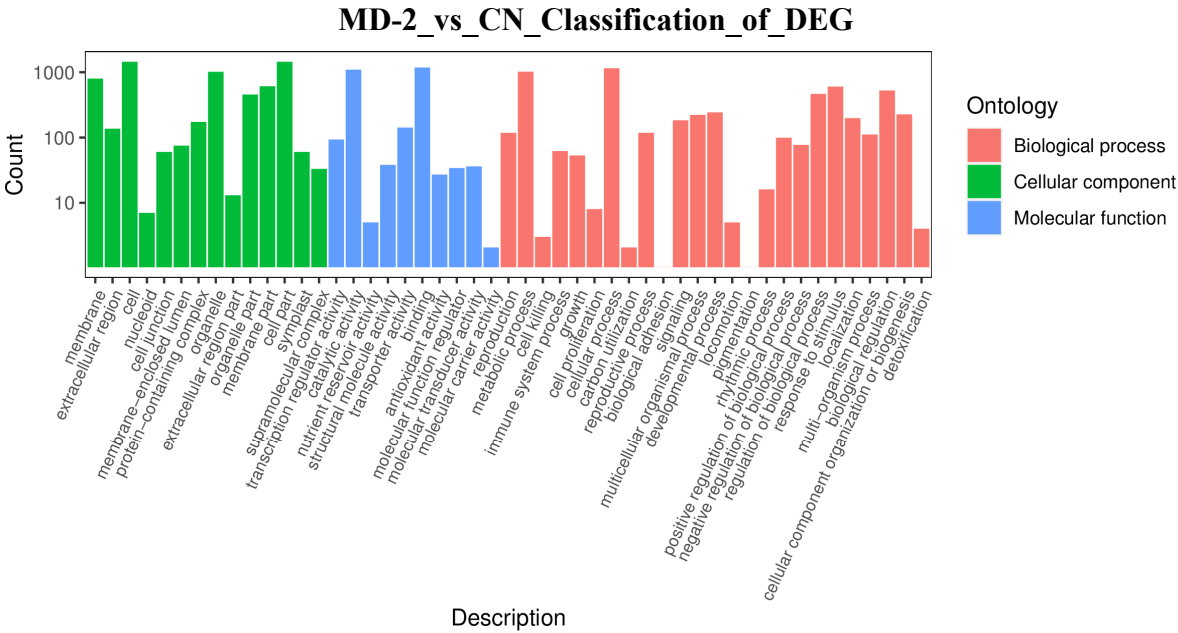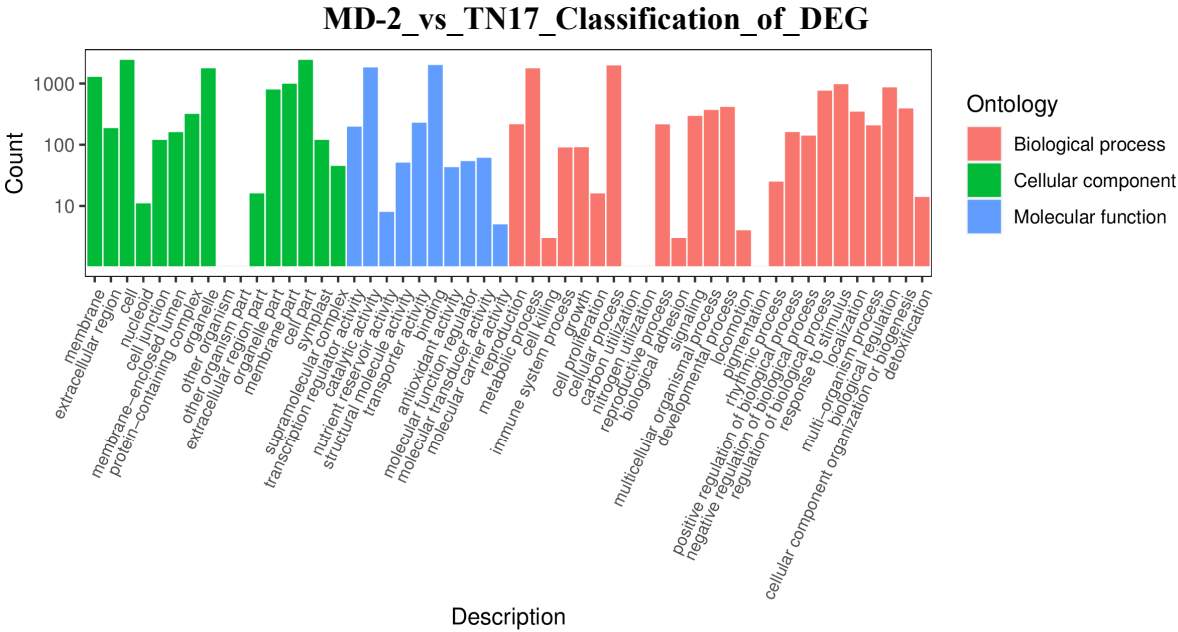

Figure S4: The GO classification of DEG between different pineapple species

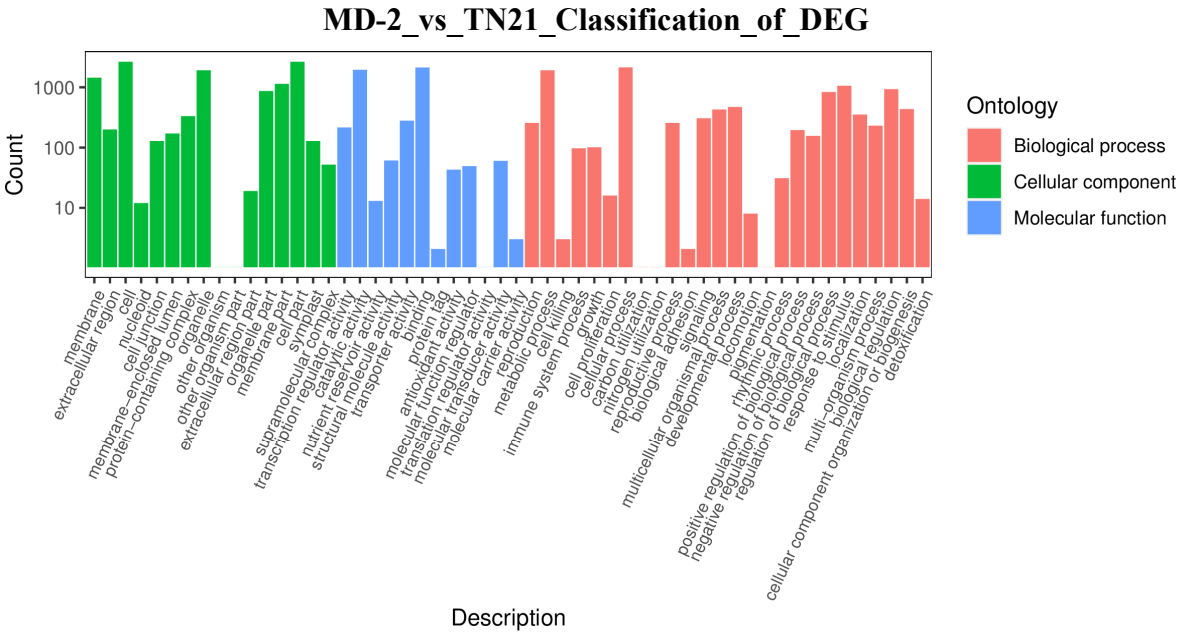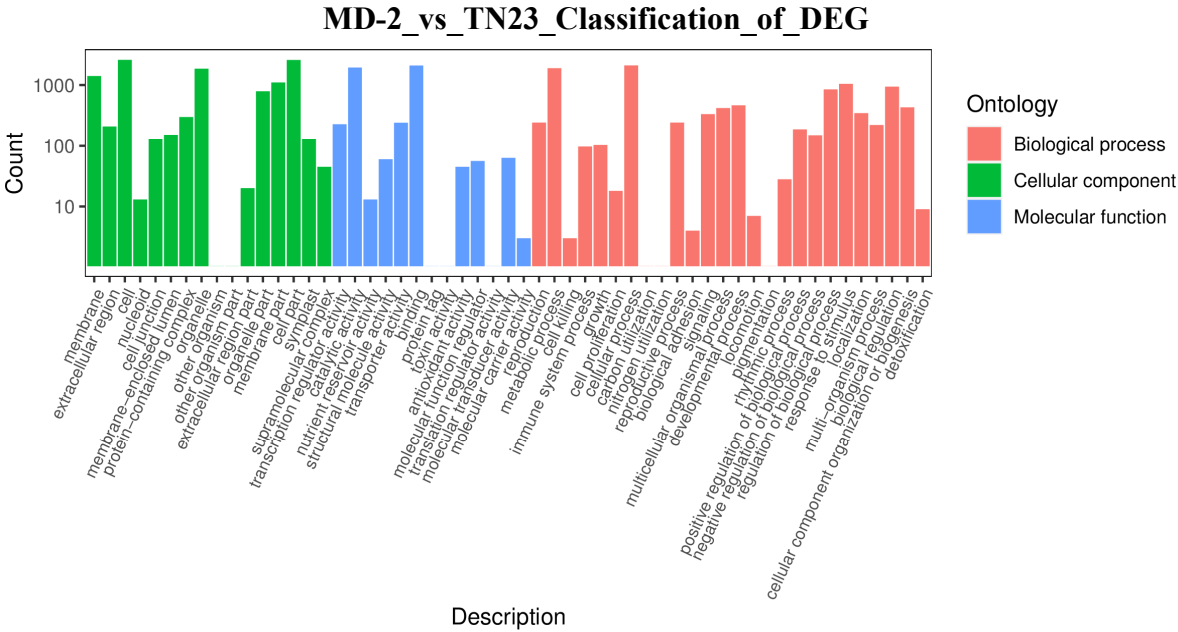



Figure S4: The GO classification of DEG between different pineapple species

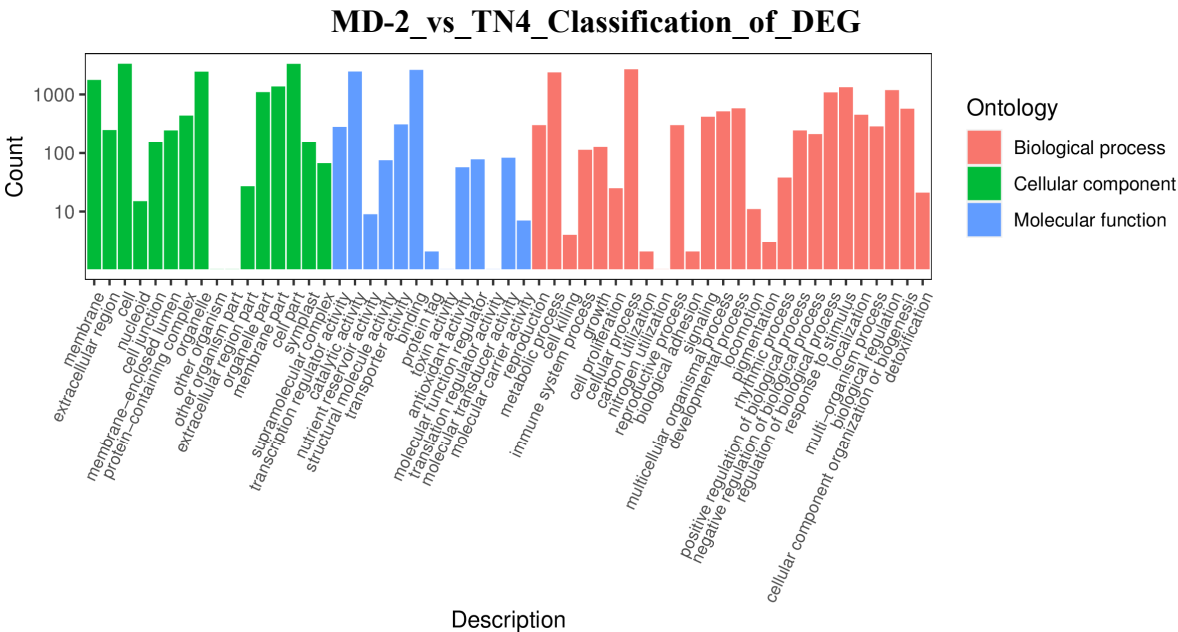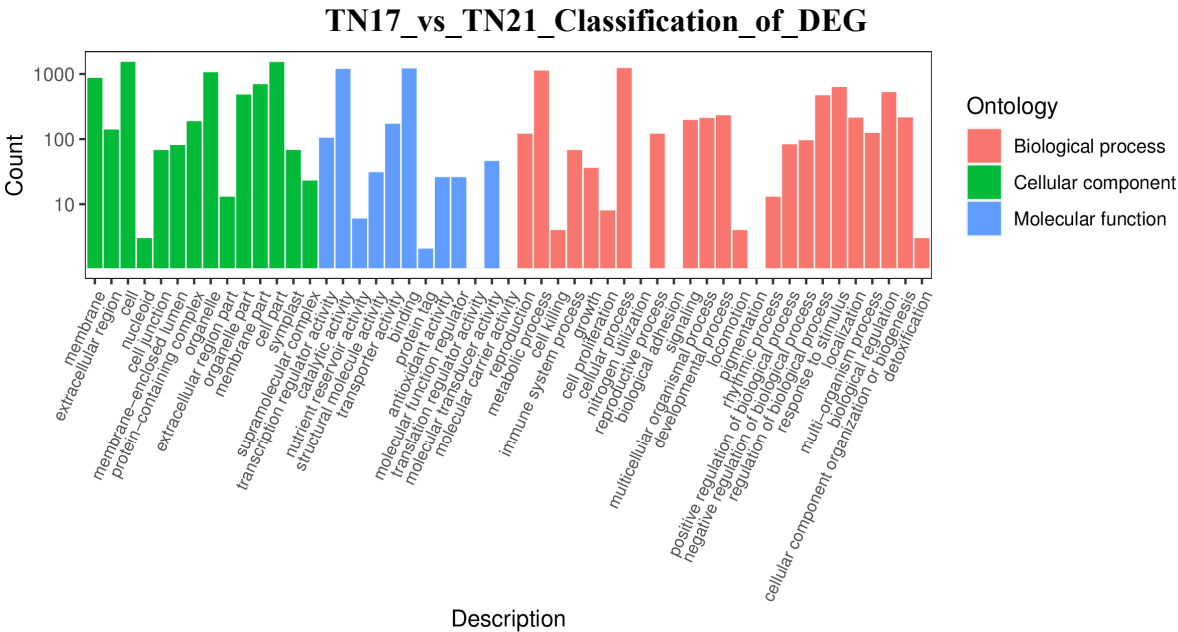



Figure S4: The GO classification of DEG between different pineapple species

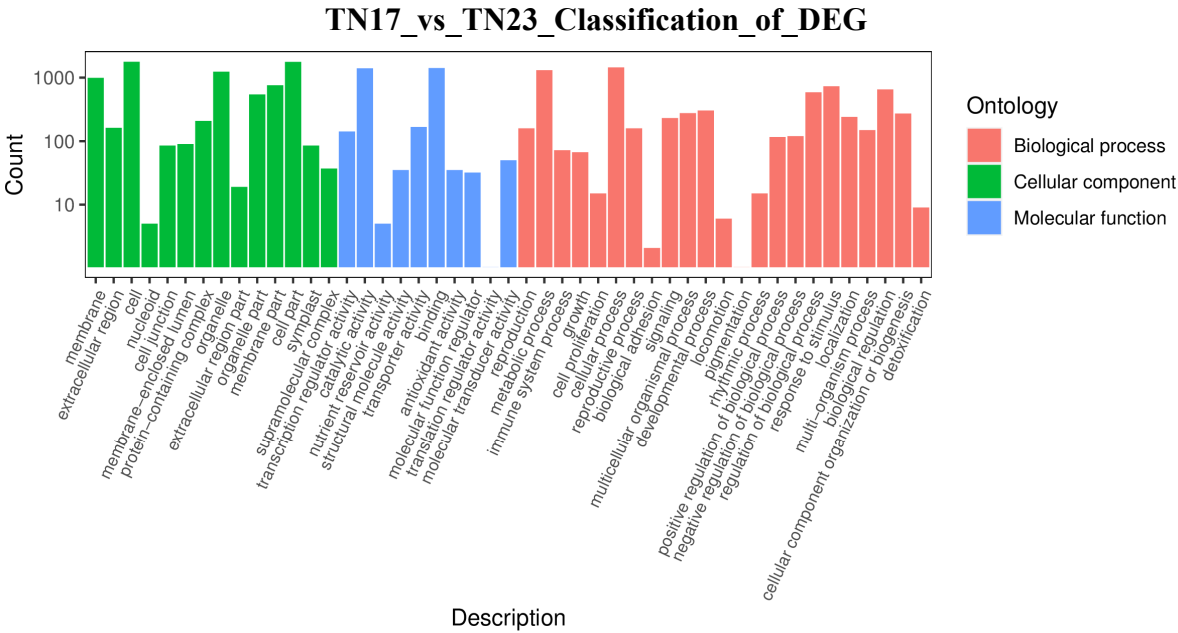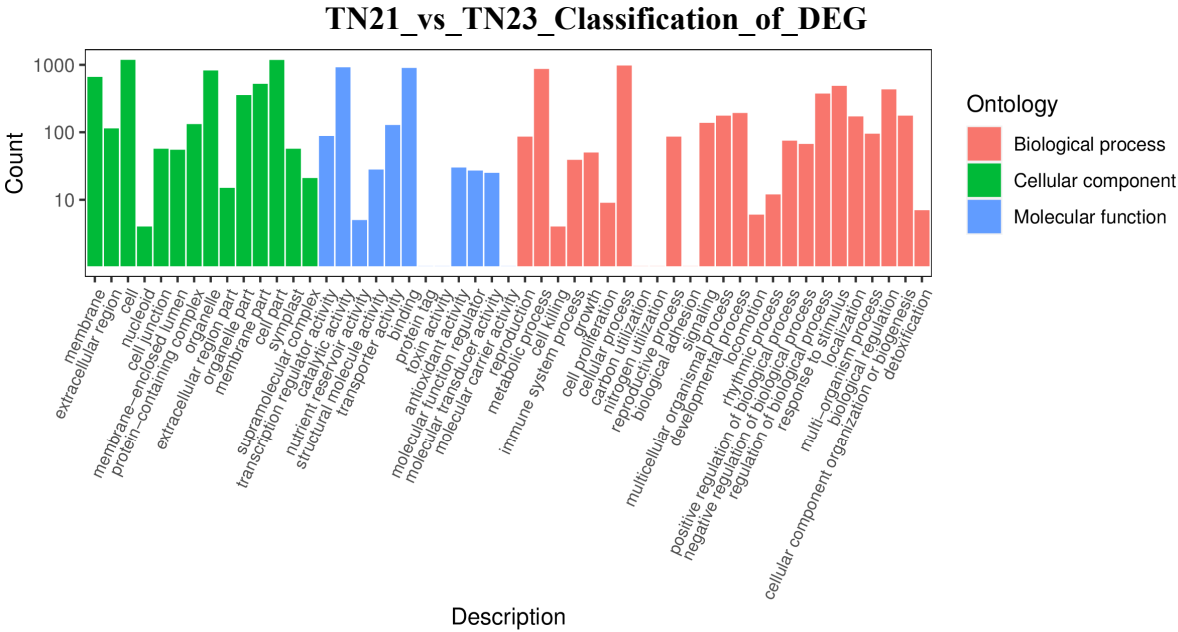

Figure S4: The GO classification of DEG between different pineapple species

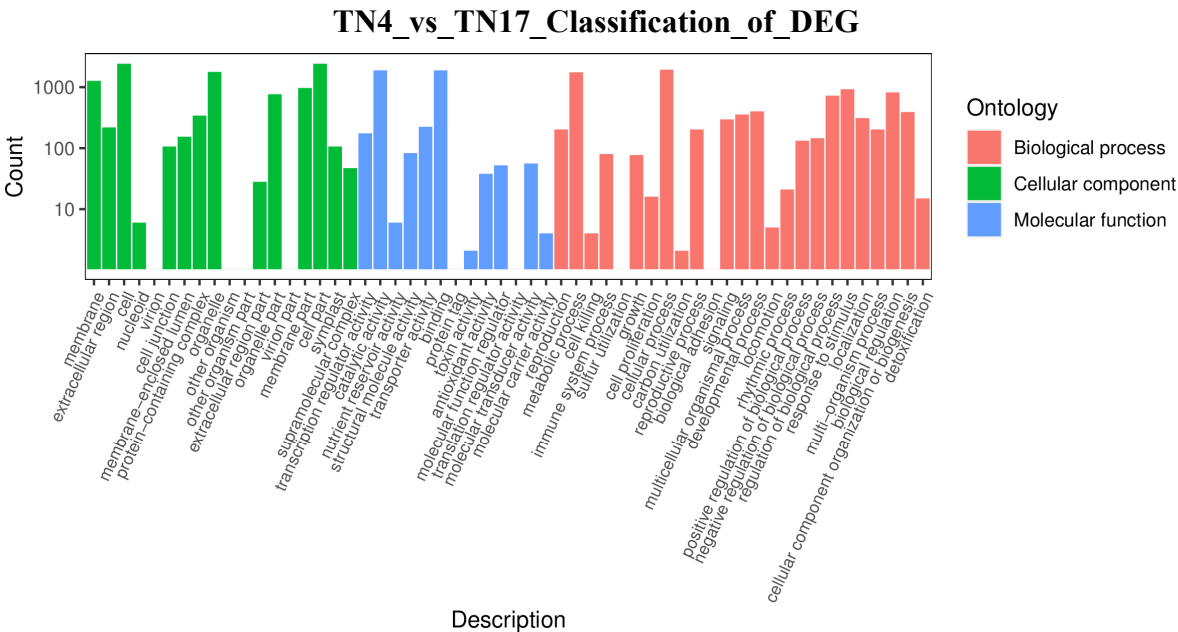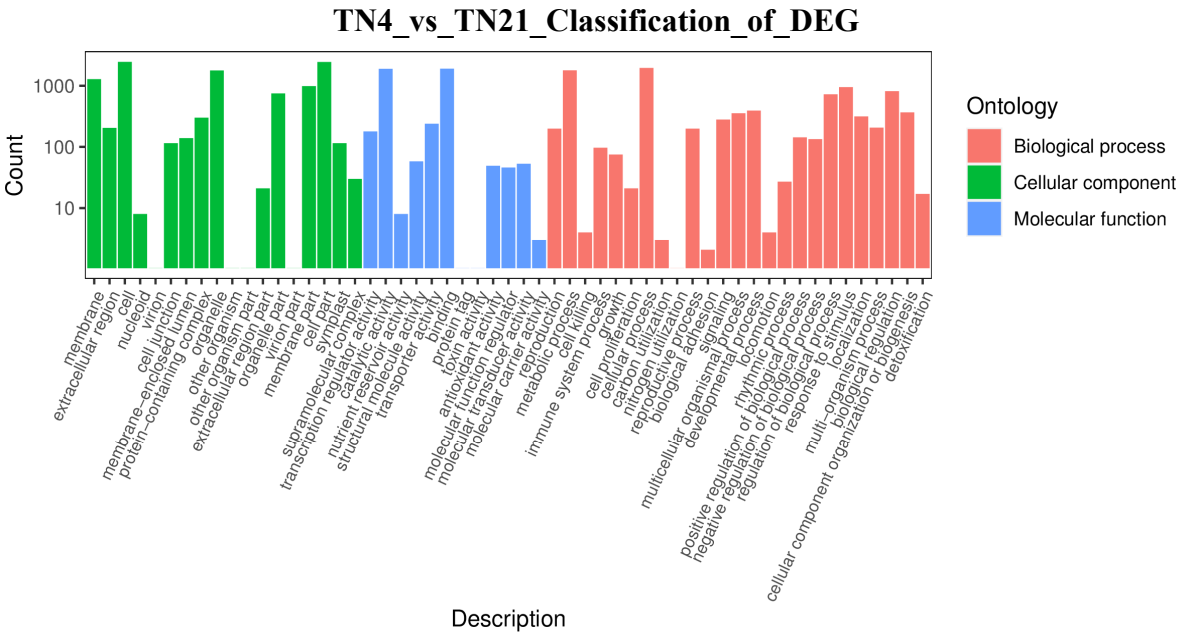

Figure S4: The GO classification of DEG between different pineapple species

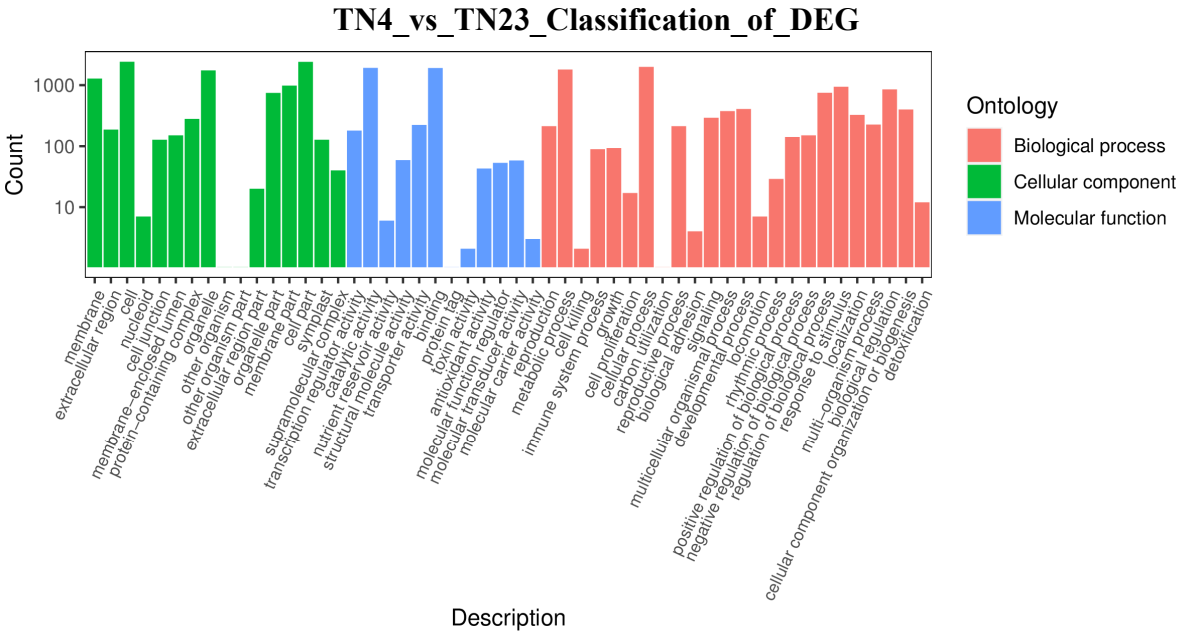

Supplement: s1 [file s1]
