# Supplementary material for: Integrated Metabolome and Transcriptome Analysis Reveals a Potential Mechanism for Water Accumulation Mediated Translucency in Pineapple (Ananas comosus (L.) Merr.) Fruit
Source: MDPI journal article supplement (doi:10.3390/ijms24087199), 2023-04-13

**Figure S2: Metabolome enrichment analysis for among the top 20 annotated KEGG pathways.**

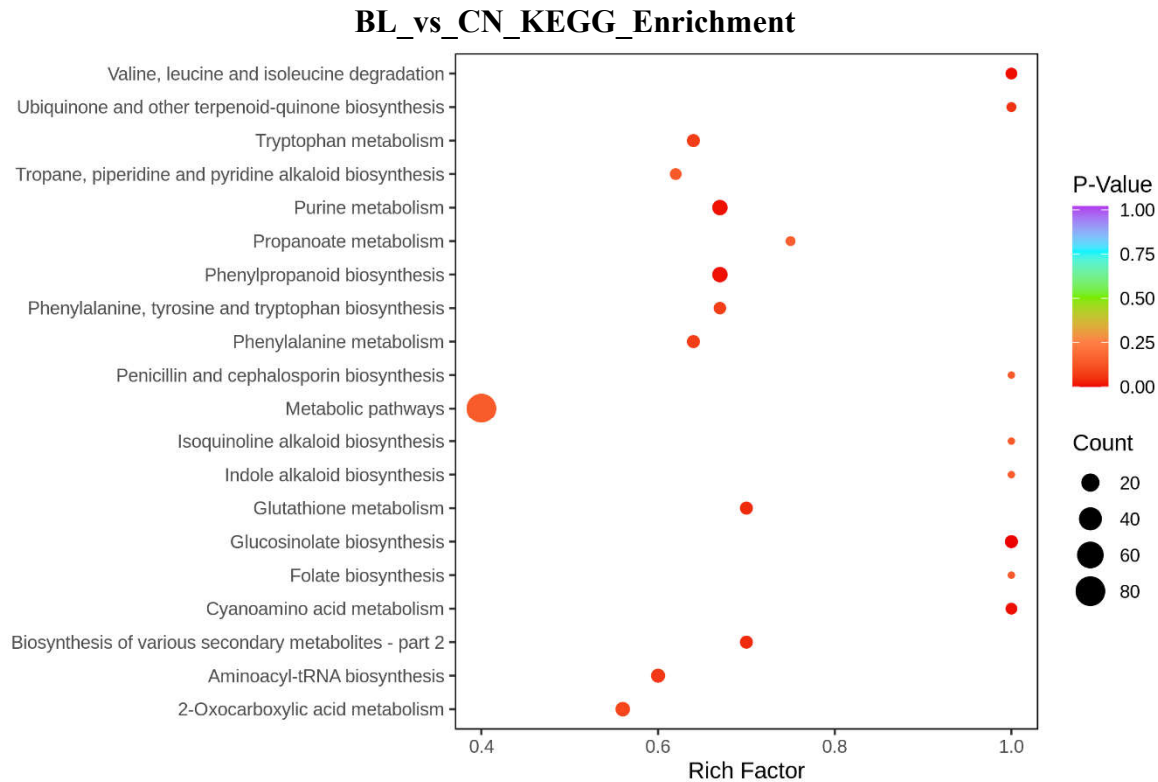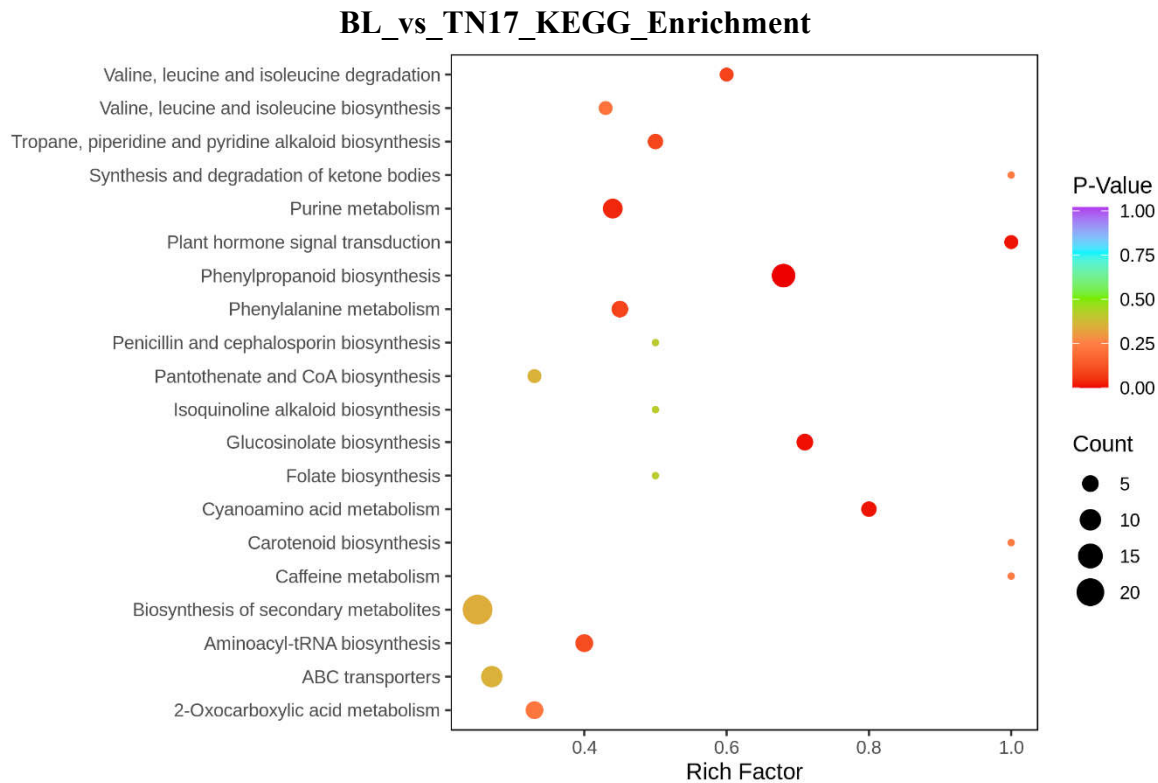

**Figure S2: Metabolome enrichment analysis for among the top 20 annotated KEGG pathways.**

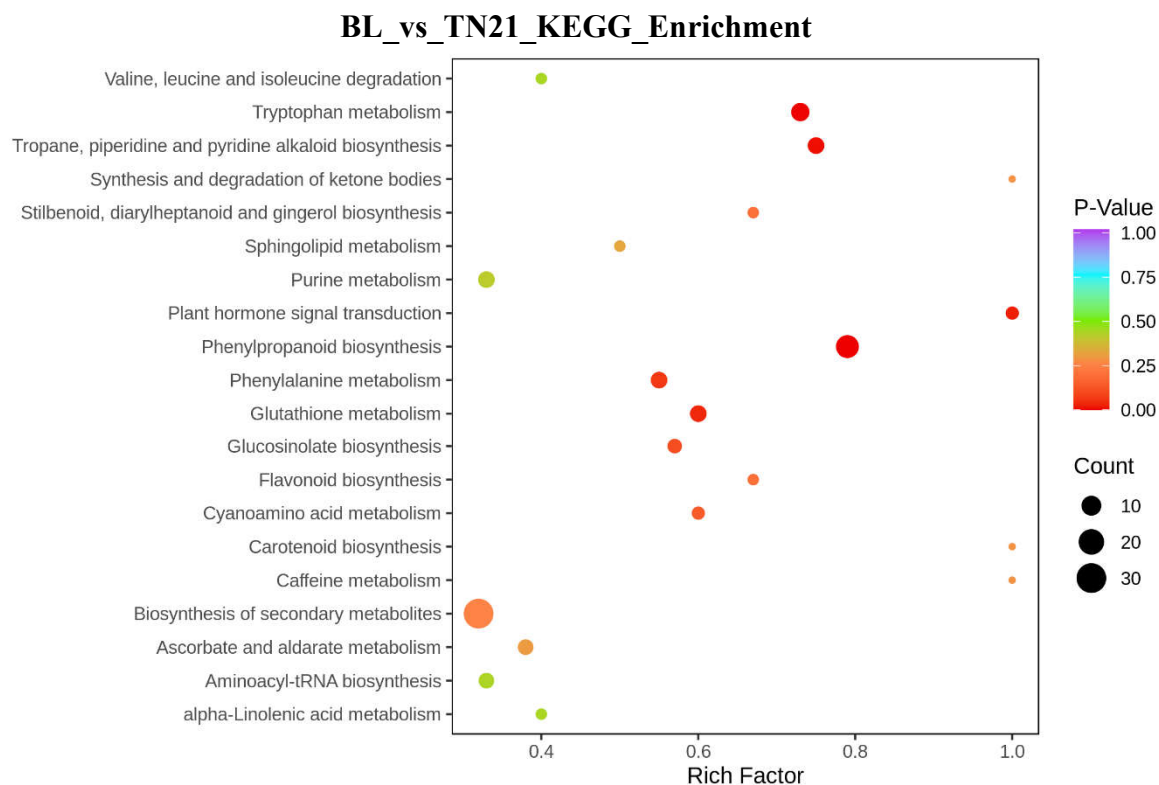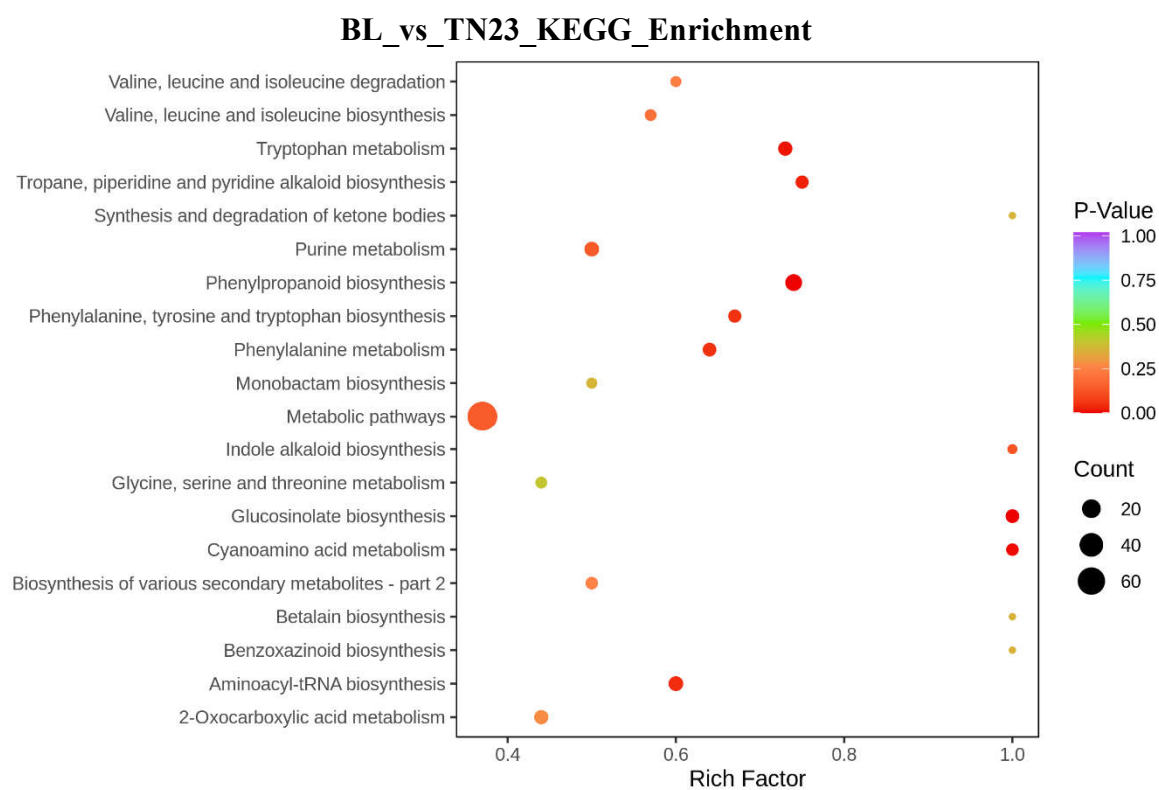

**Figure S2: Metabolome enrichment analysis for among the top 20 annotated KEGG pathways.**

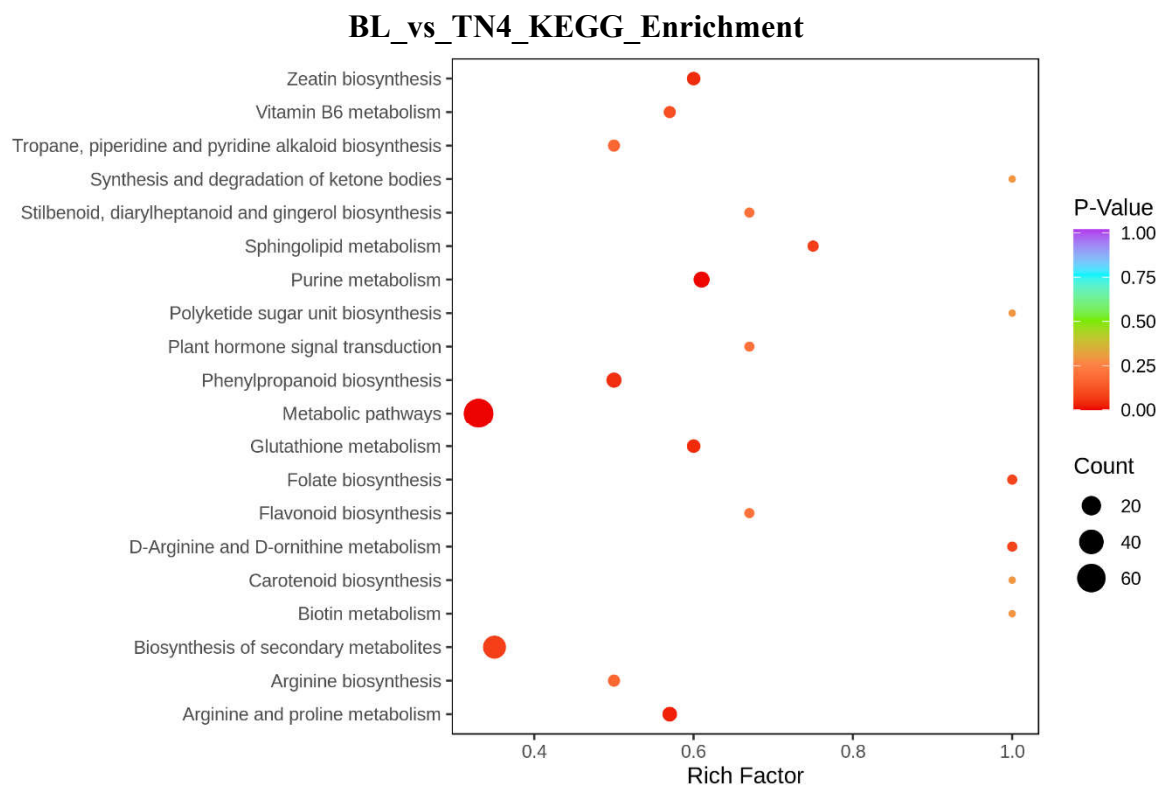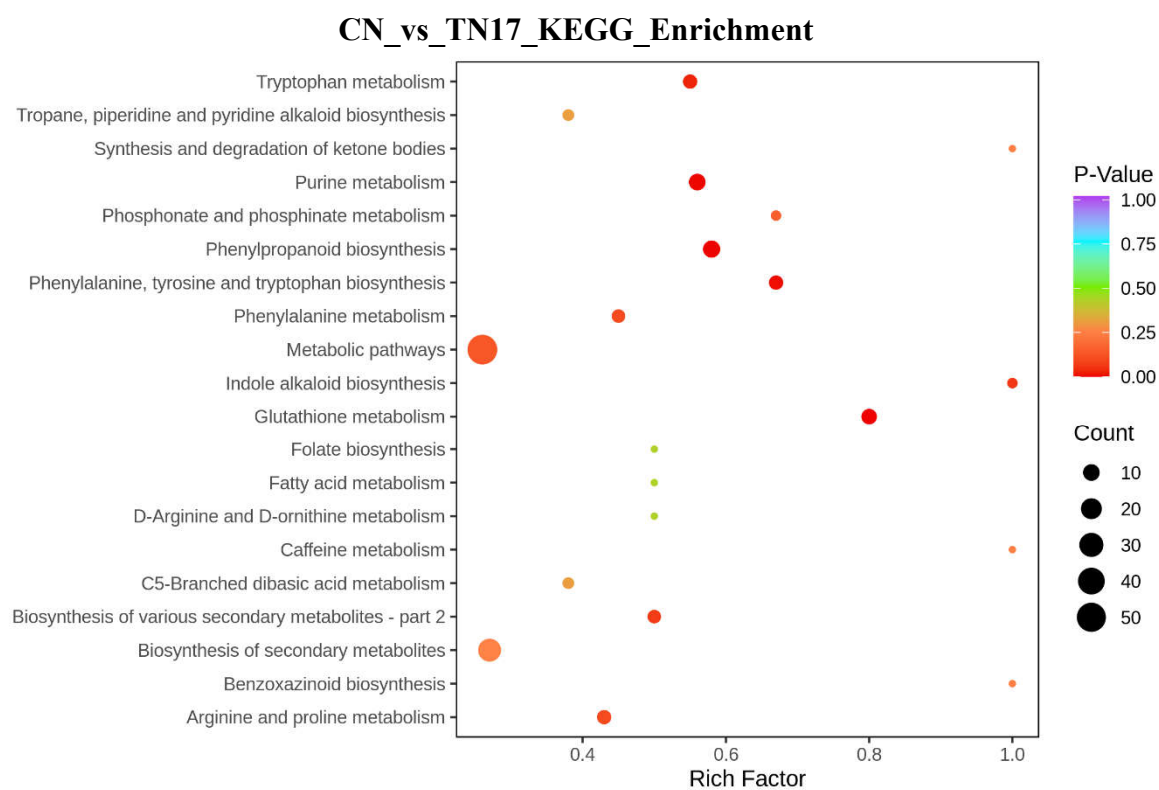

**Figure S2: Metabolome enrichment analysis for among the top 20 annotated KEGG pathways.**

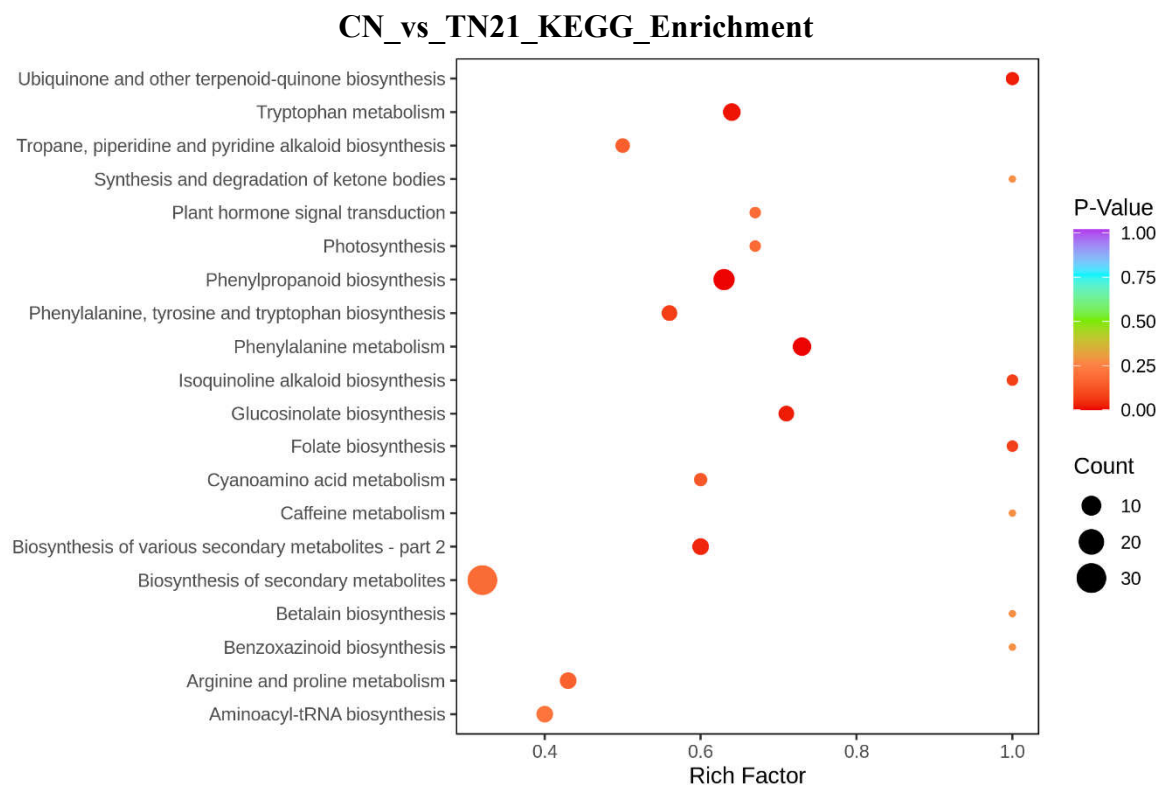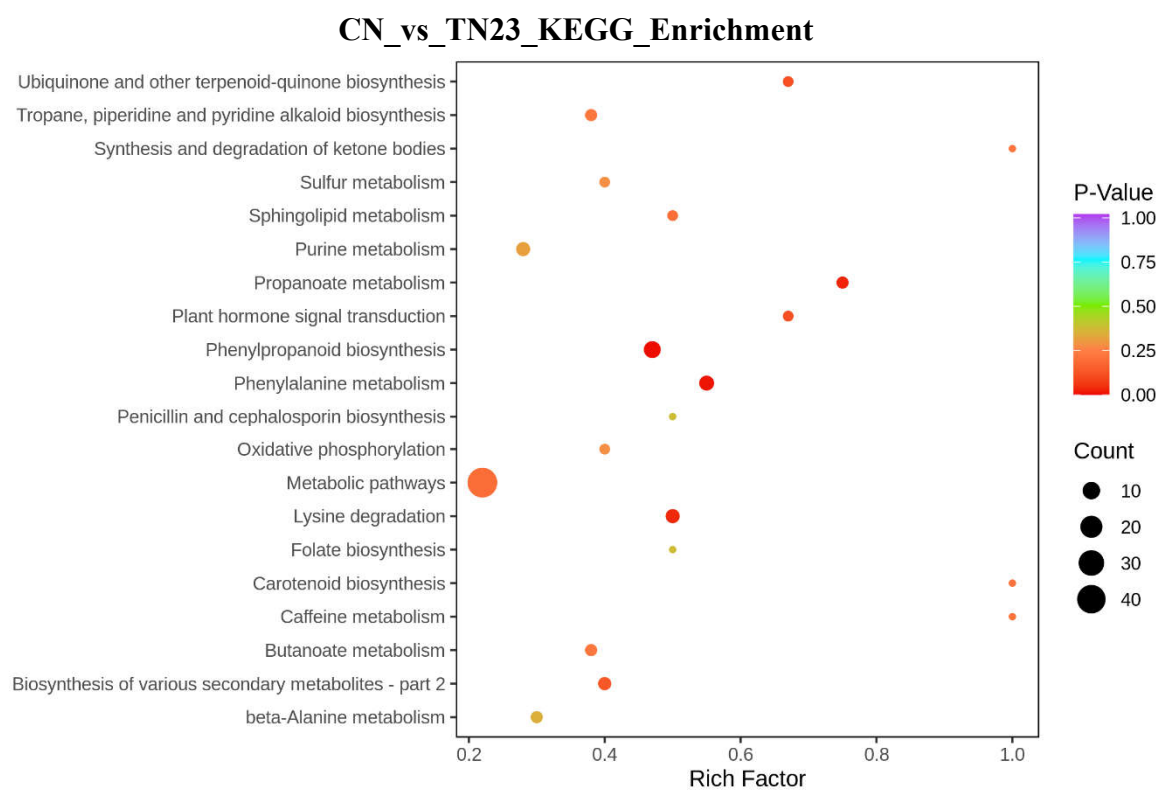

**Figure S2: Metabolome enrichment analysis for among the top 20 annotated KEGG pathways.**

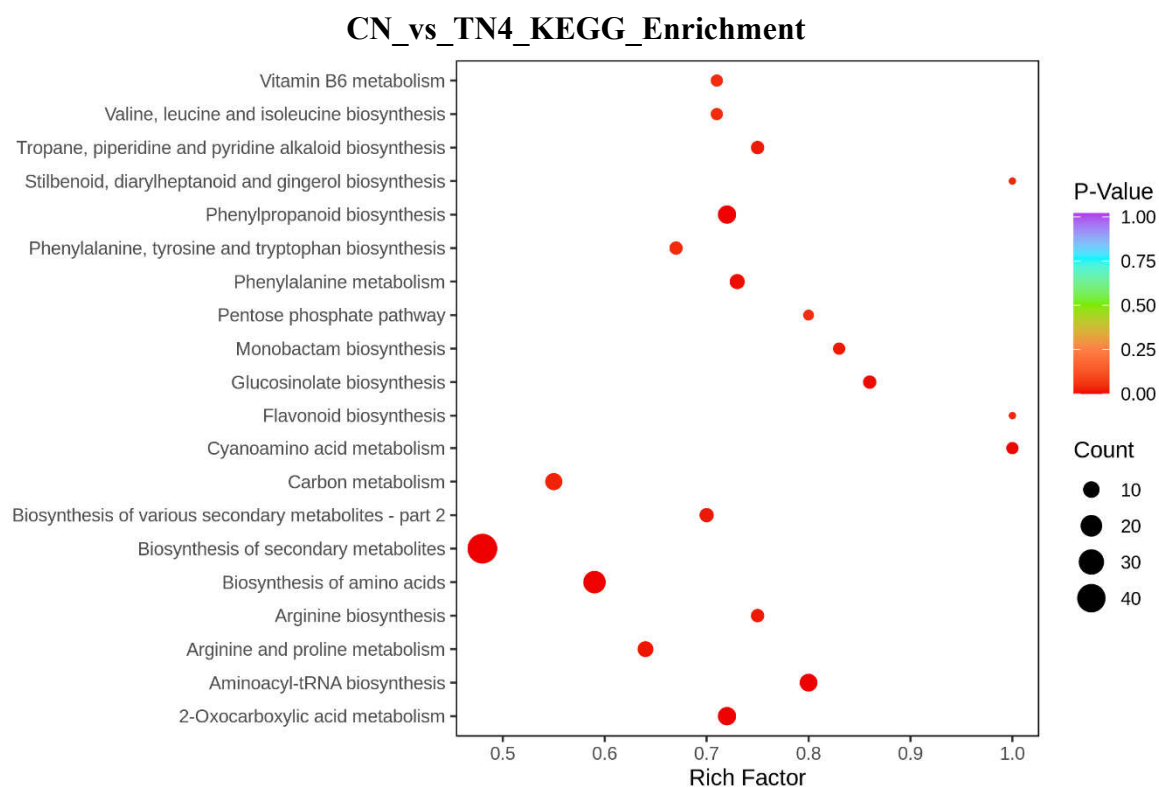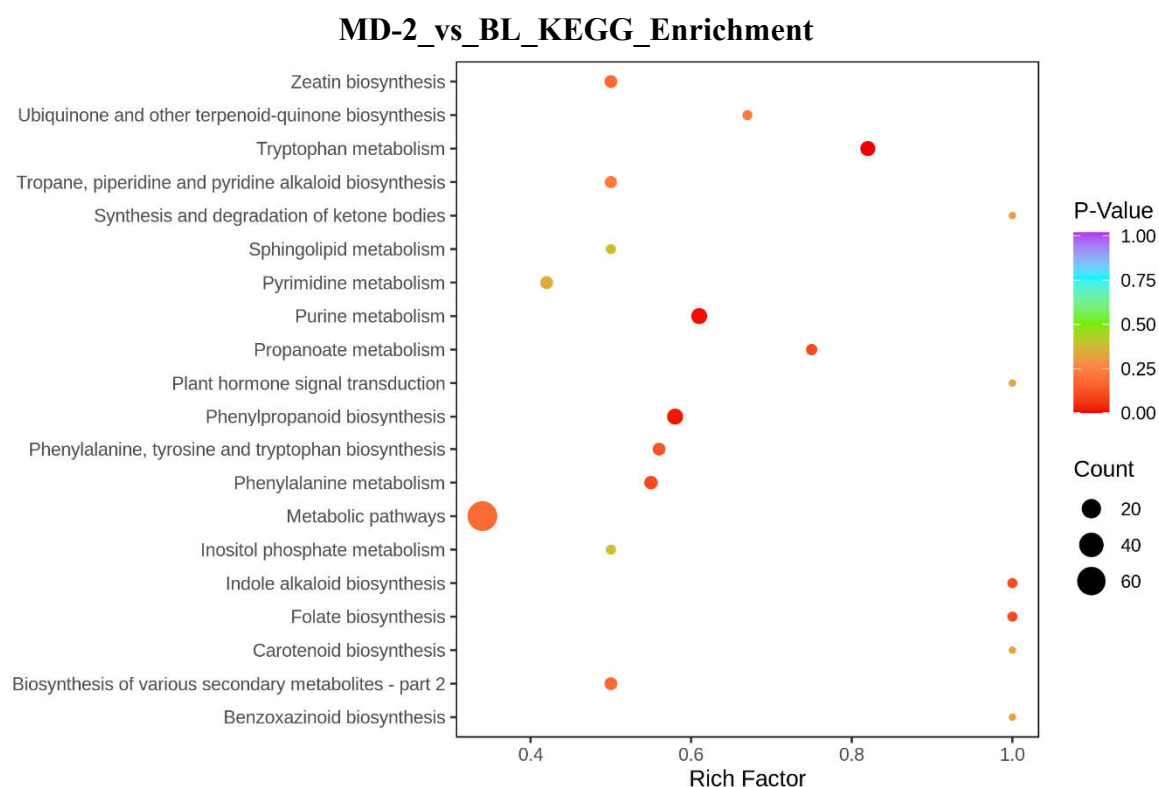

**Figure S2: Metabolome enrichment analysis for among the top 20 annotated KEGG pathways.**

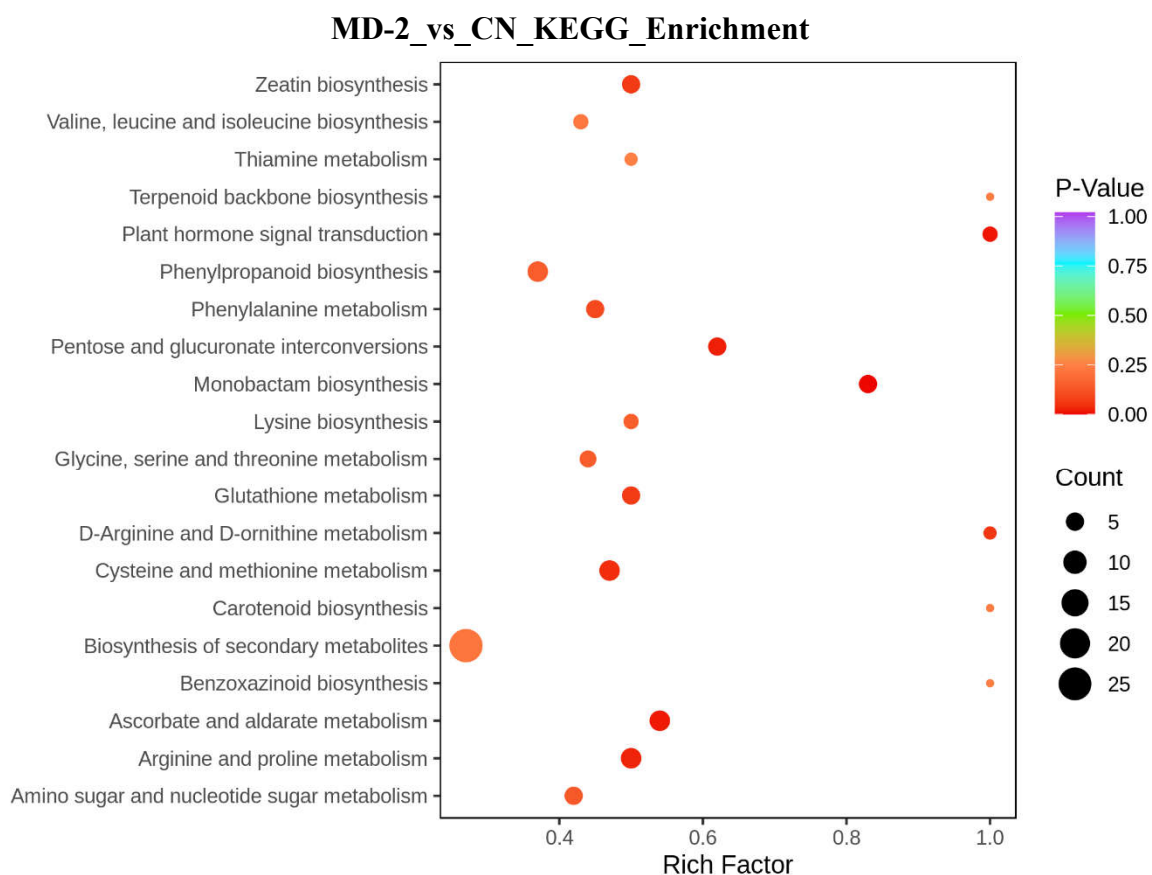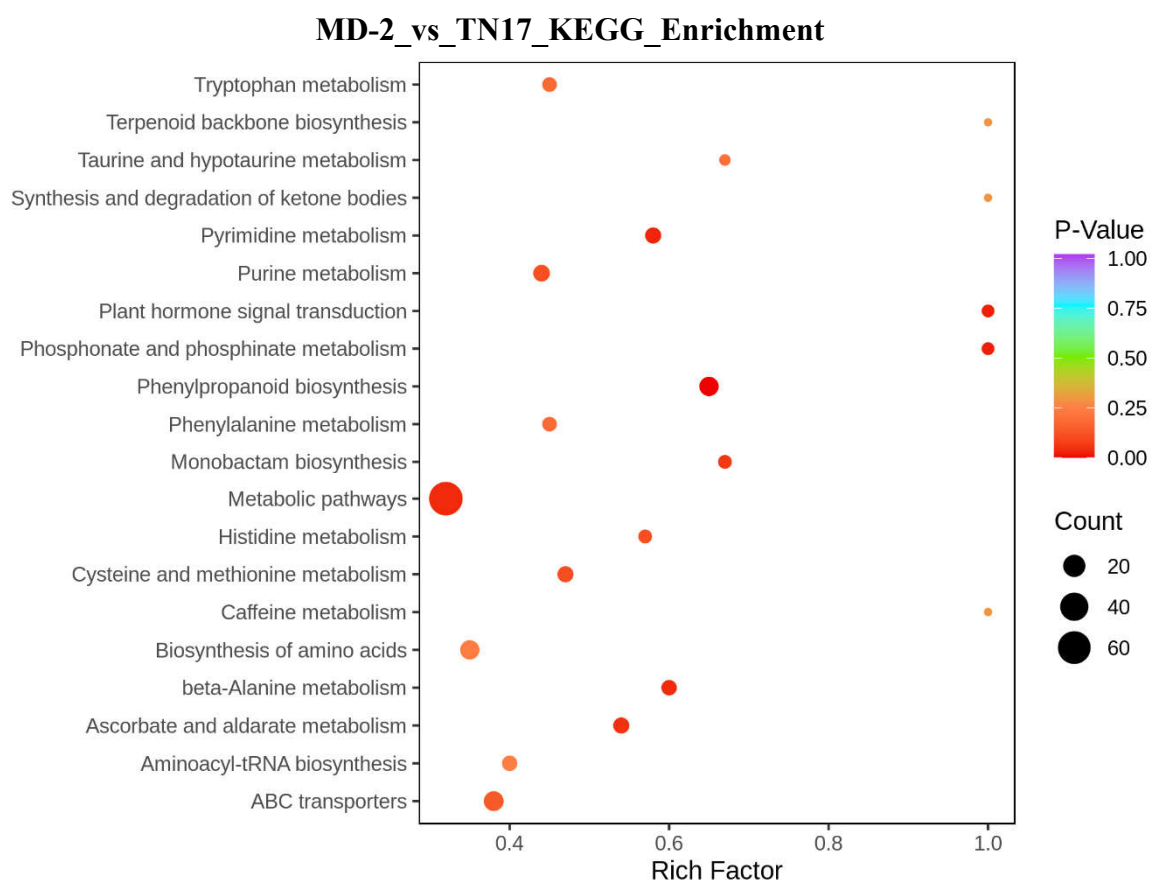

**Figure S2: Metabolome enrichment analysis for among the top 20 annotated KEGG pathways.**

**MD-2\_vs\_TN21\_KEGG\_Enrichment**

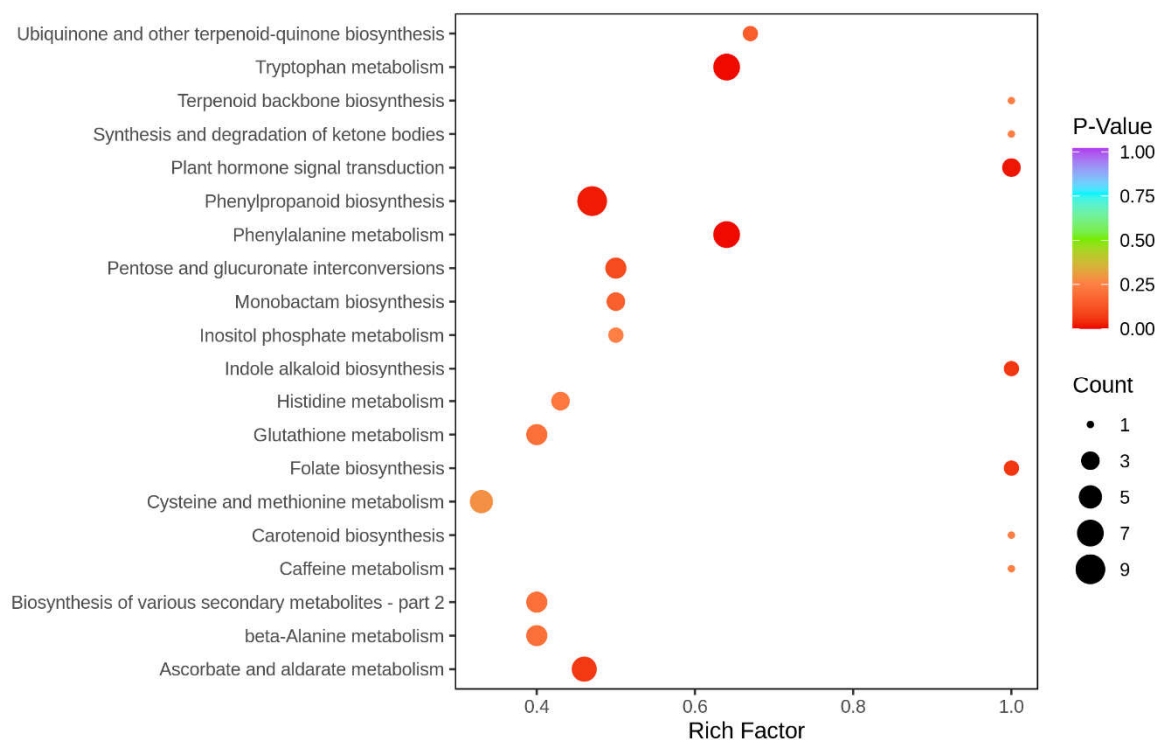

**MD-2\_vs\_TN23\_KEGG\_Enrichment**

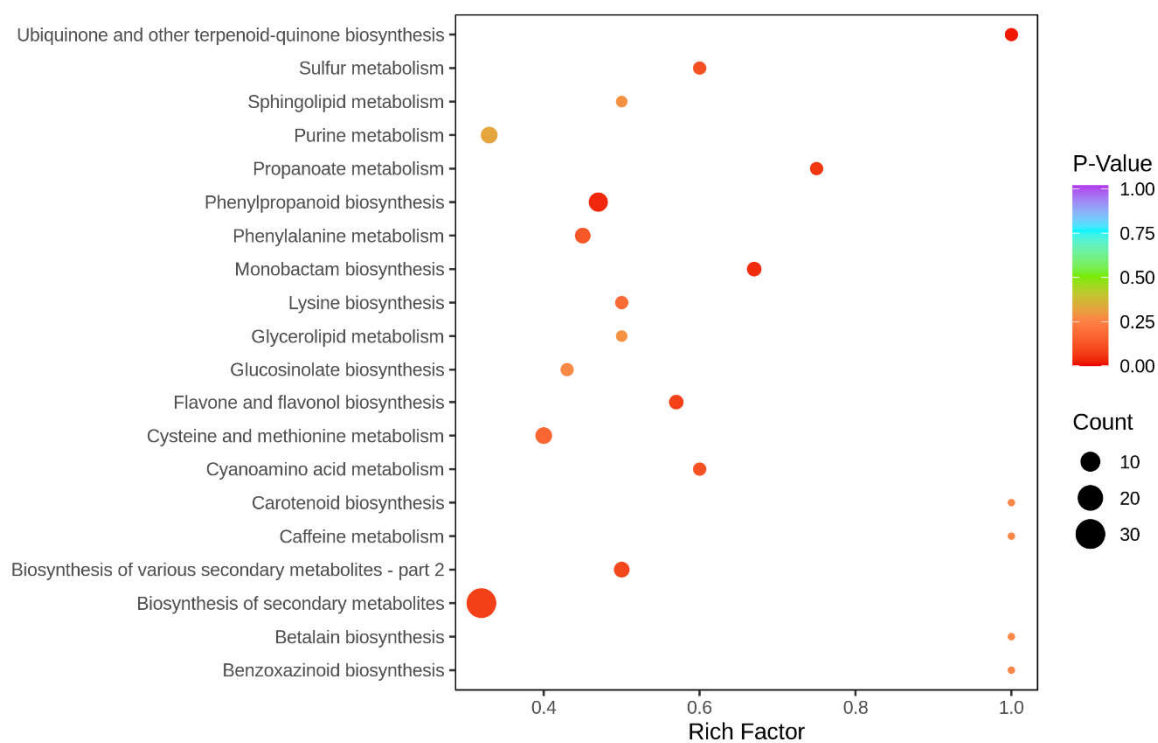



**Figure S2: Metabolome enrichment analysis for among the top 20 annotated KEGG pathways.**

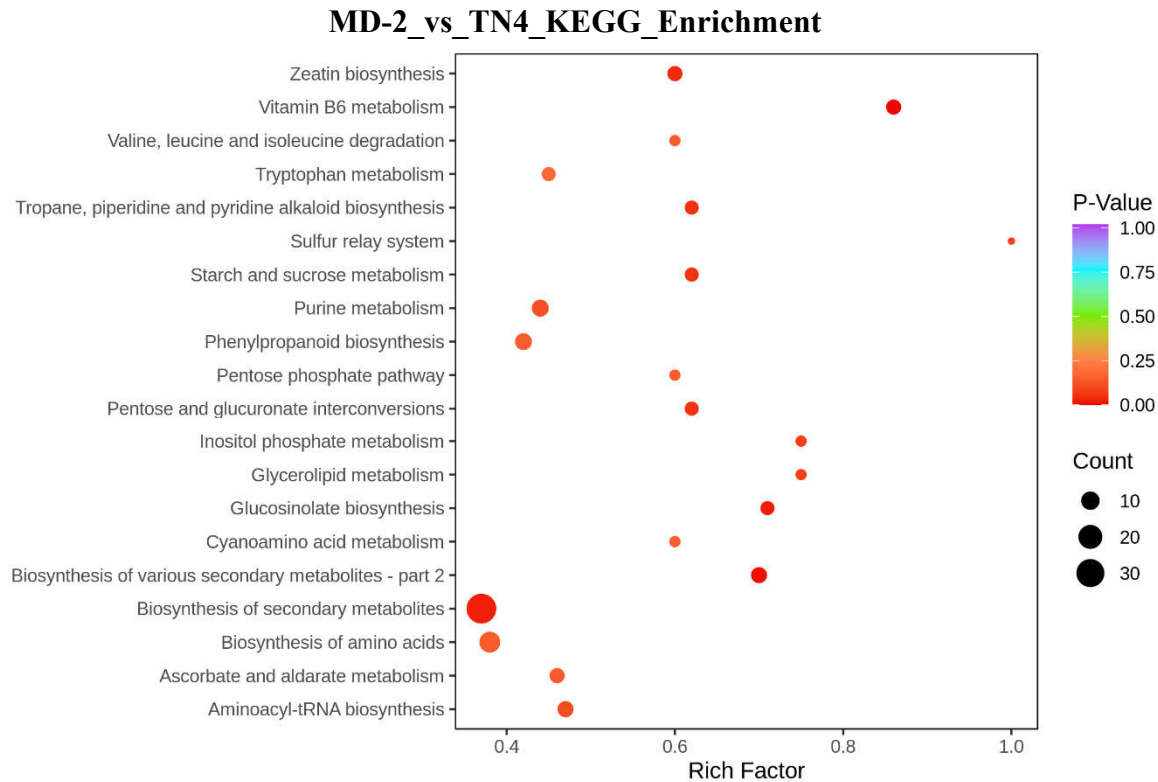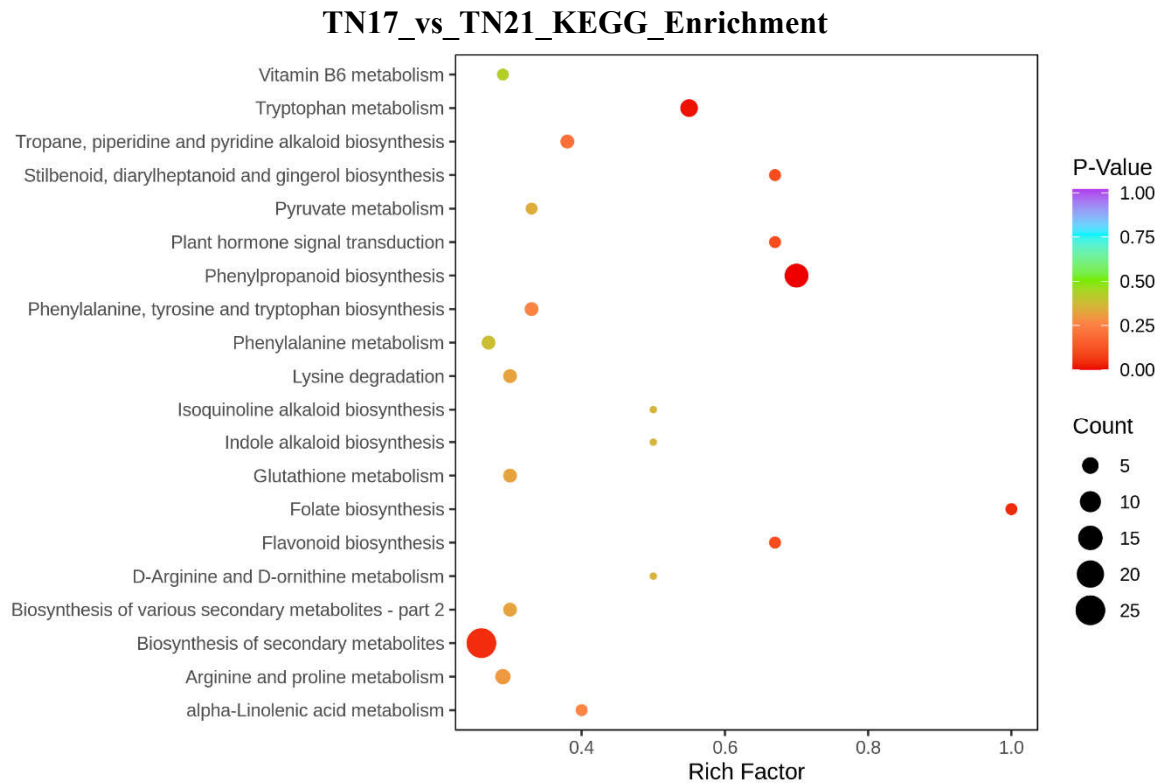



**Figure S2: Metabolome enrichment analysis for among the top 20 annotated KEGG pathways.**

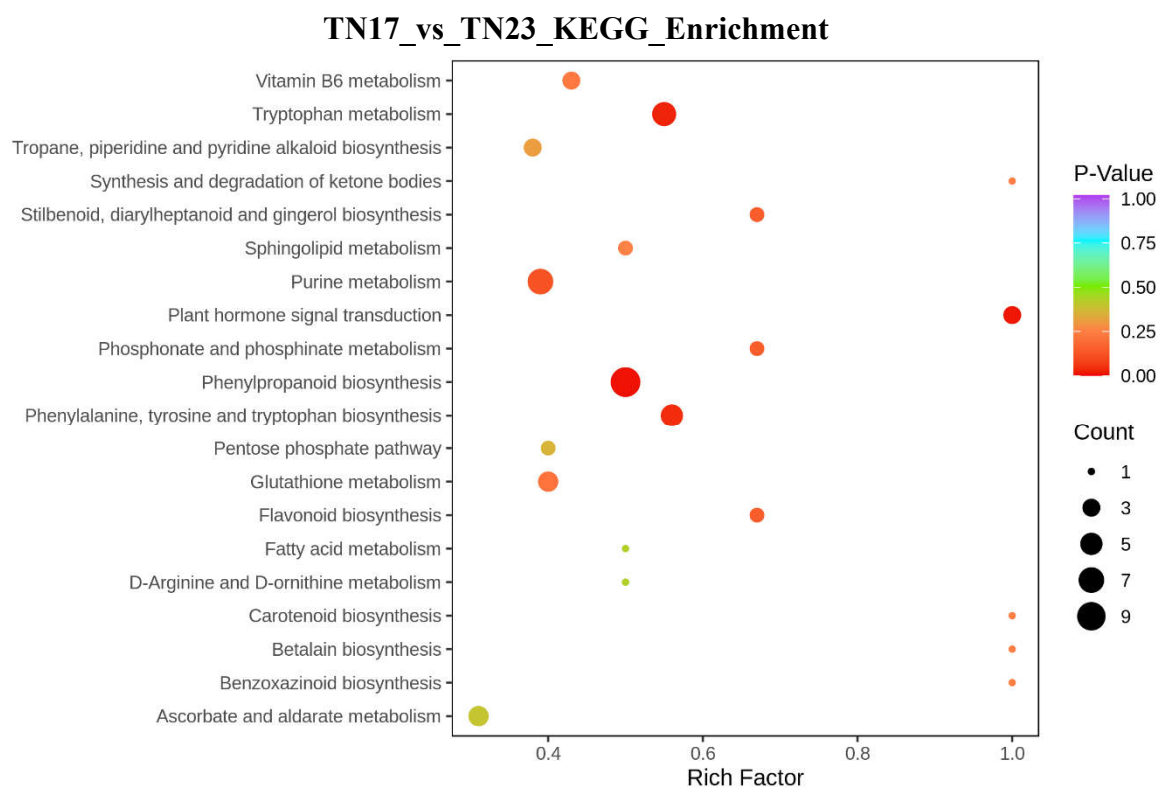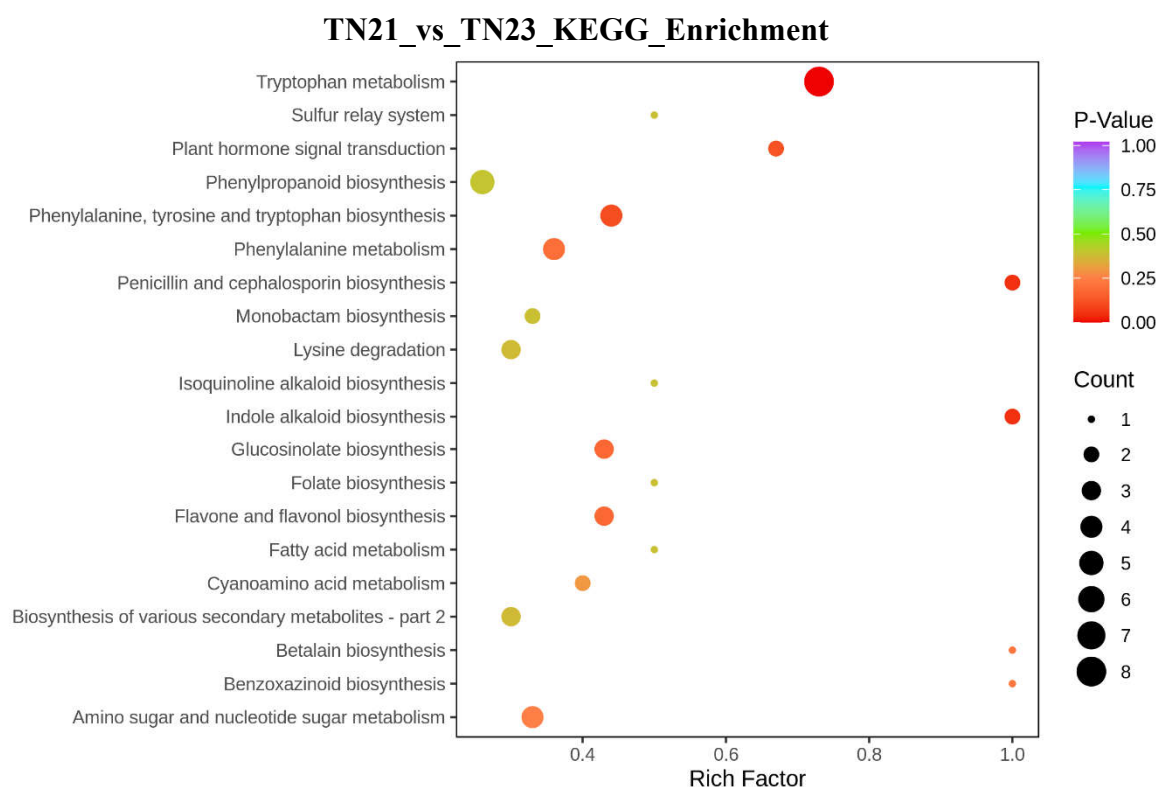

**Figure S2: Metabolome enrichment analysis for among the top 20 annotated KEGG pathways.**

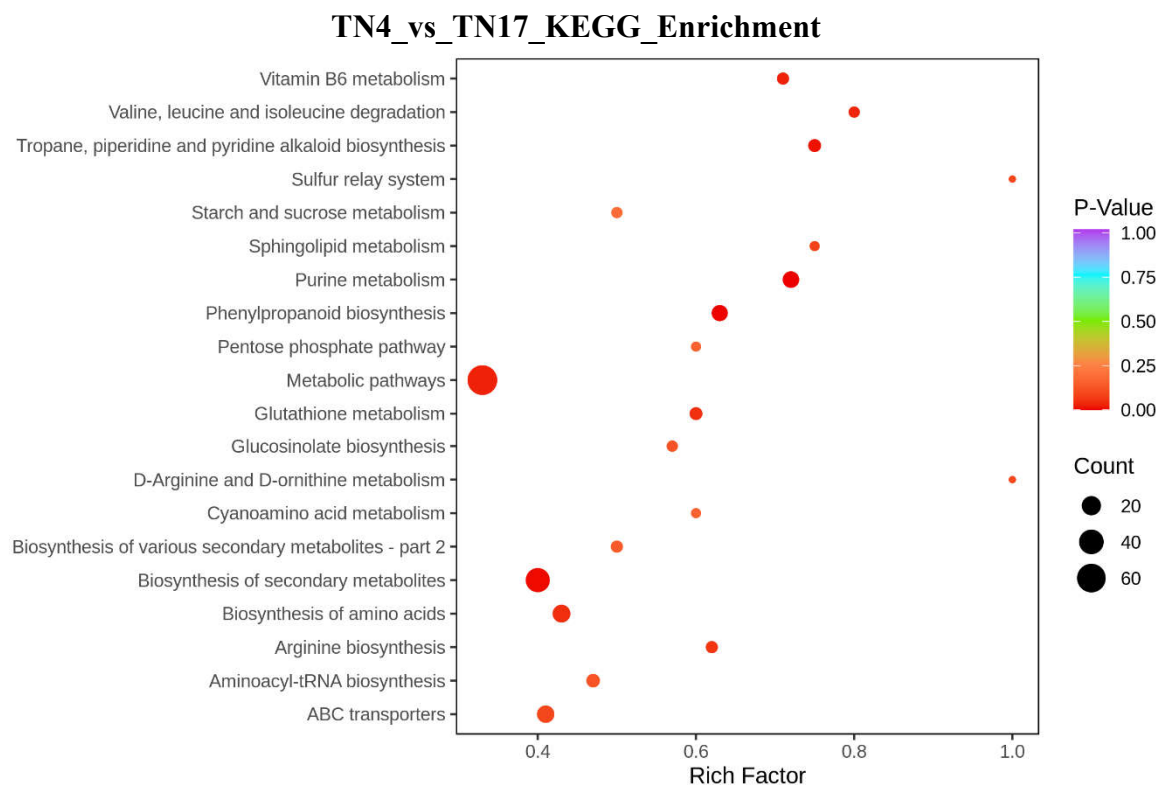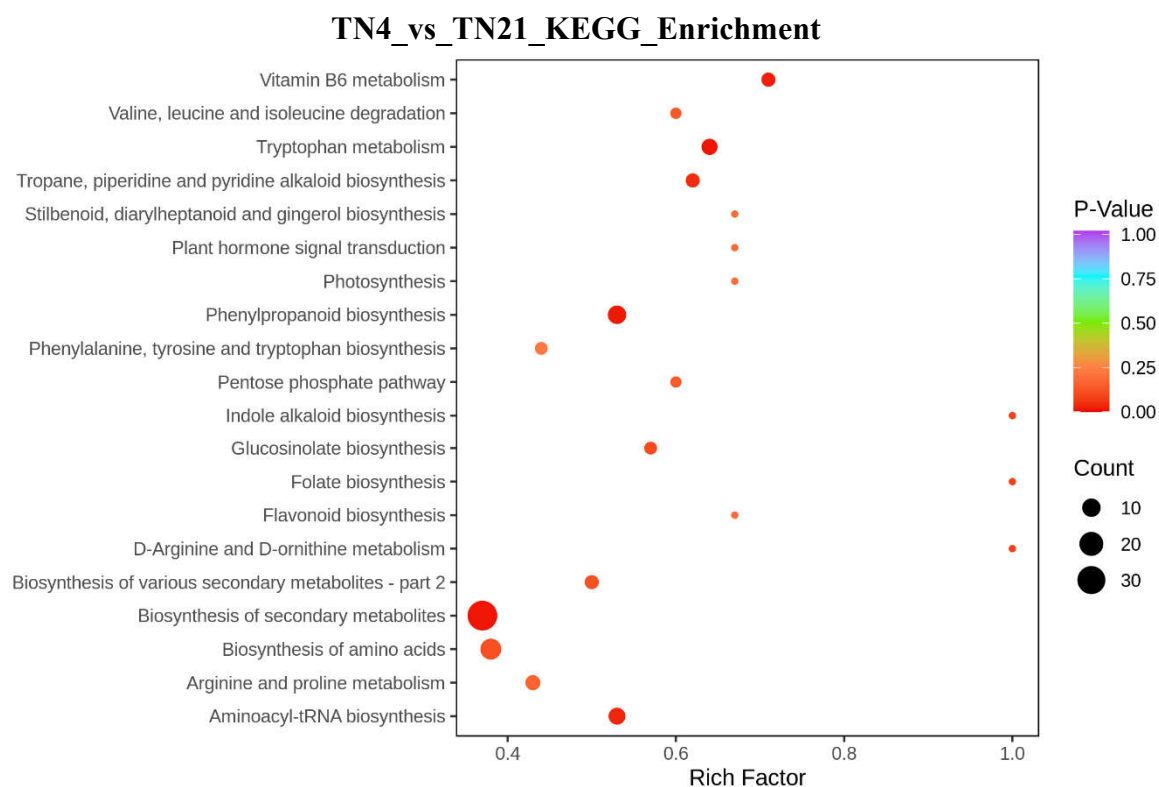

**Figure S2: Metabolome enrichment analysis for among the top 20 annotated KEGG pathways.**

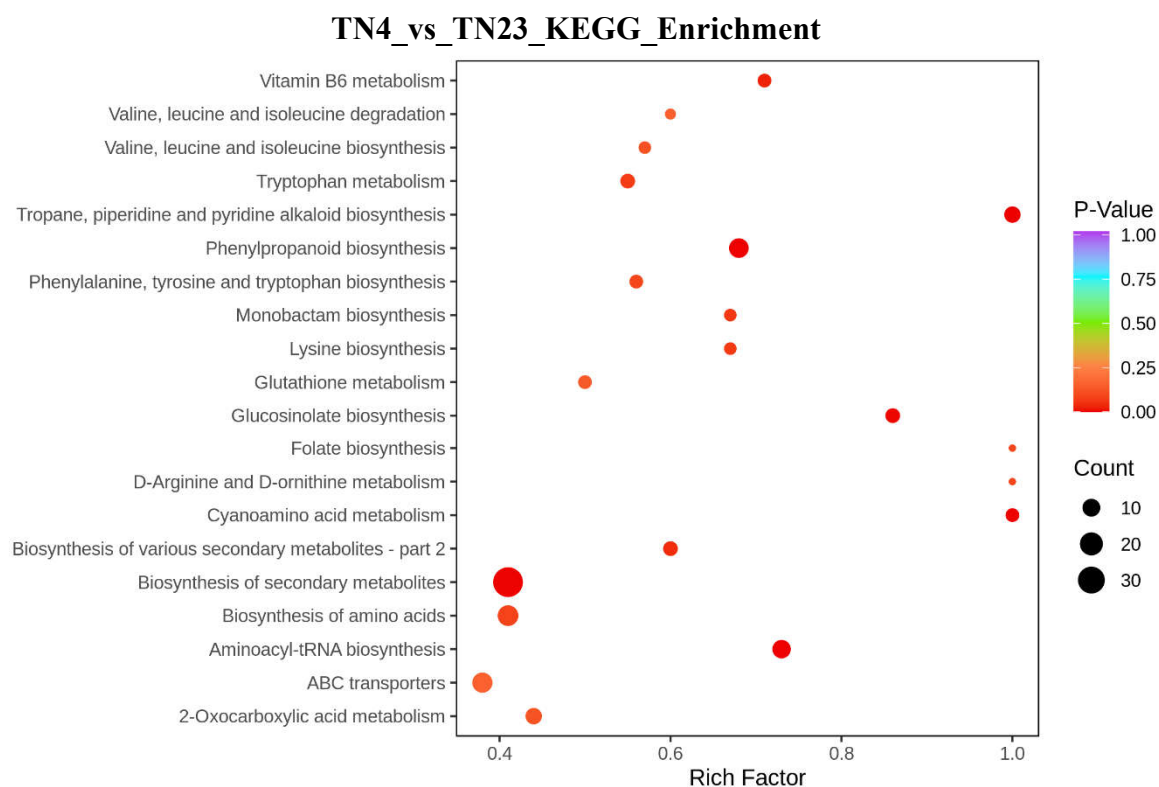

Supplement: s1 [file s1]
