# Supplementary material for: Integrated Metabolome and Transcriptome Analysis Reveals a Potential Mechanism for Water Accumulation Mediated Translucency in Pineapple (Ananas comosus (L.) Merr.) Fruit
Source: MDPI journal article supplement (doi:10.3390/ijms24087199), 2023-04-13

**Figure S5: GO enrichment analysis of differentially expressed genes**  
**BL\_vs\_CN**

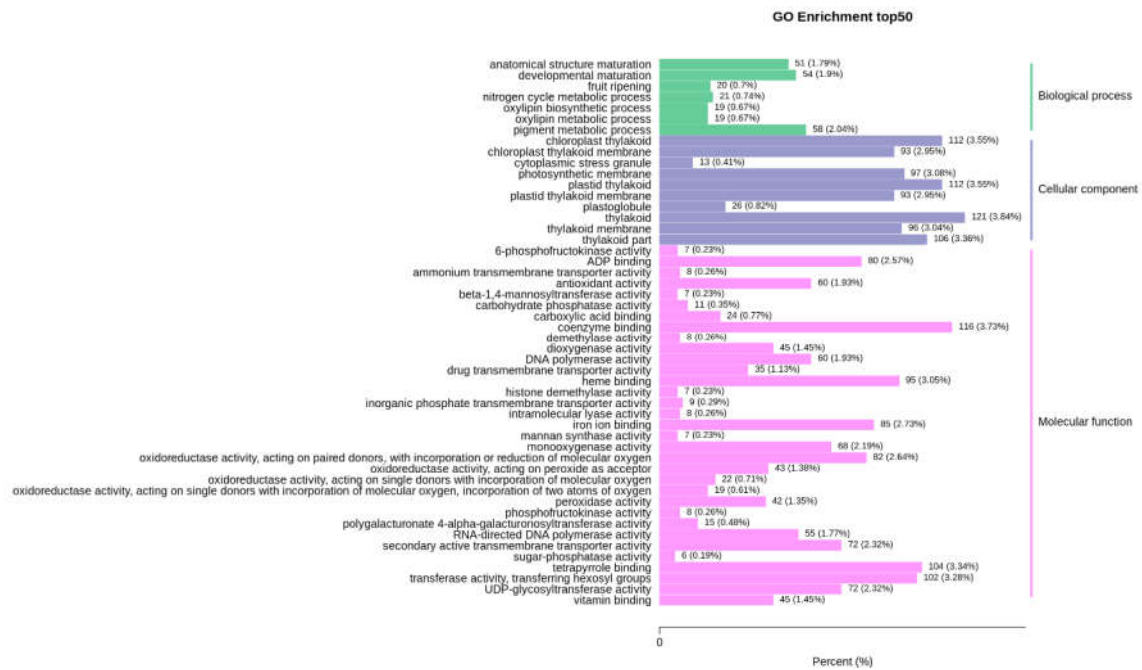

**Figure S5: GO enrichment analysis of differentially expressed genes**  
**BL\_vs\_TN17**

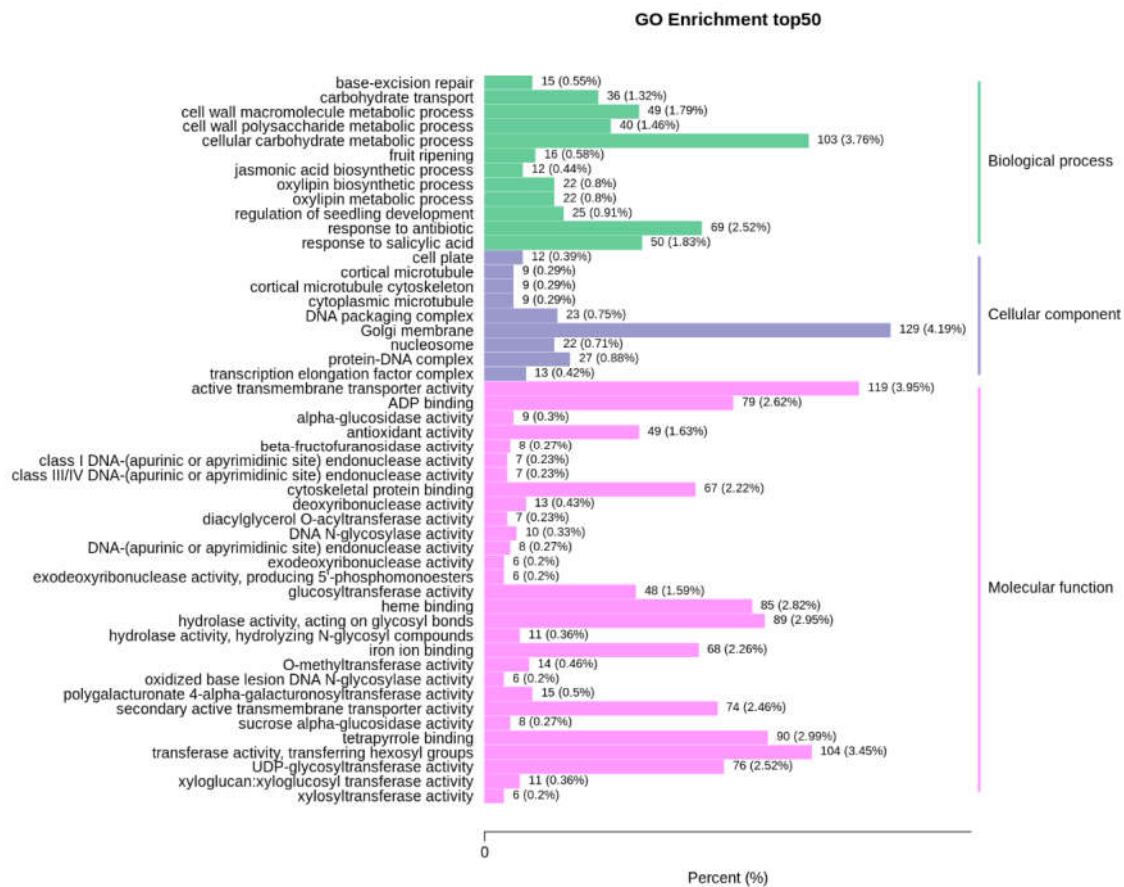

**Figure S5: GO enrichment analysis of differentially expressed genes**

**BL\_vs\_TN21**

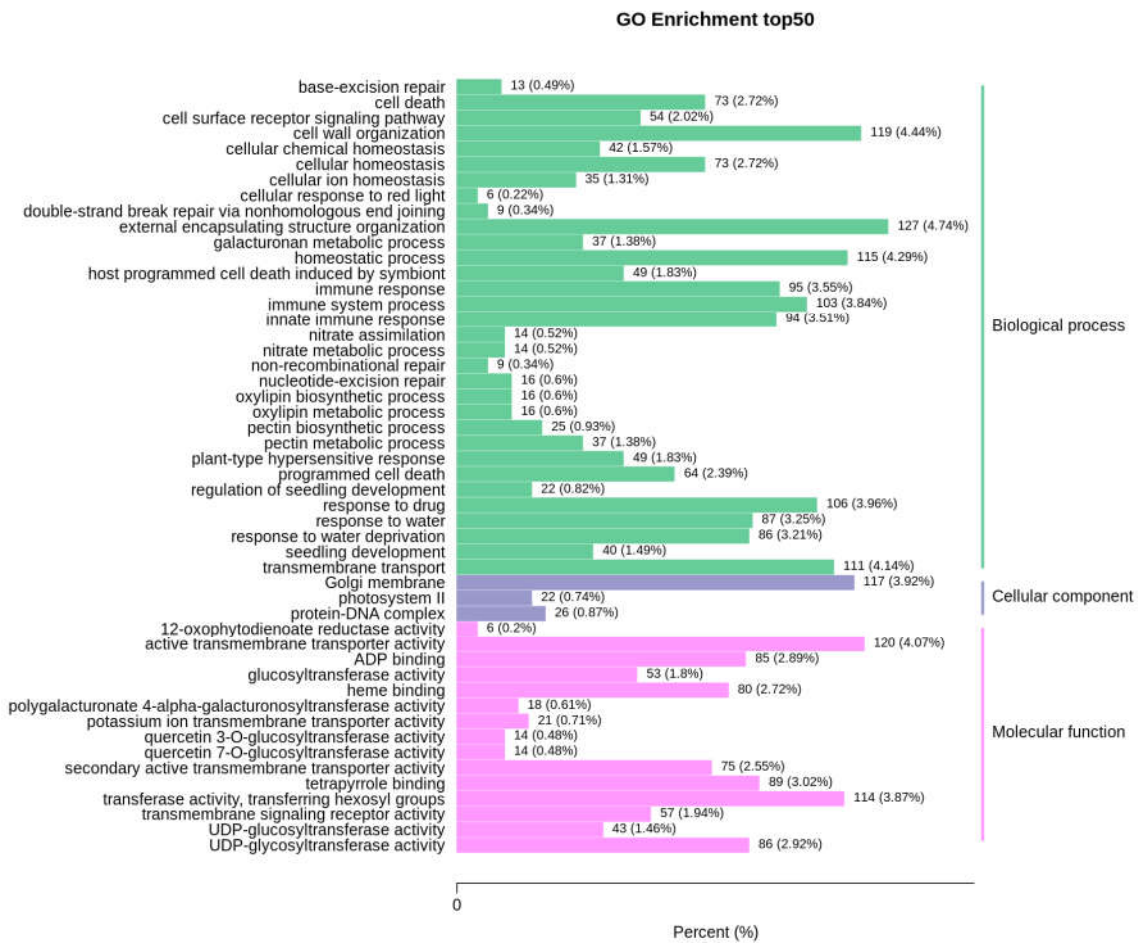

**Figure S5: GO enrichment analysis of differentially expressed genes**

**BL\_vs\_TN23**

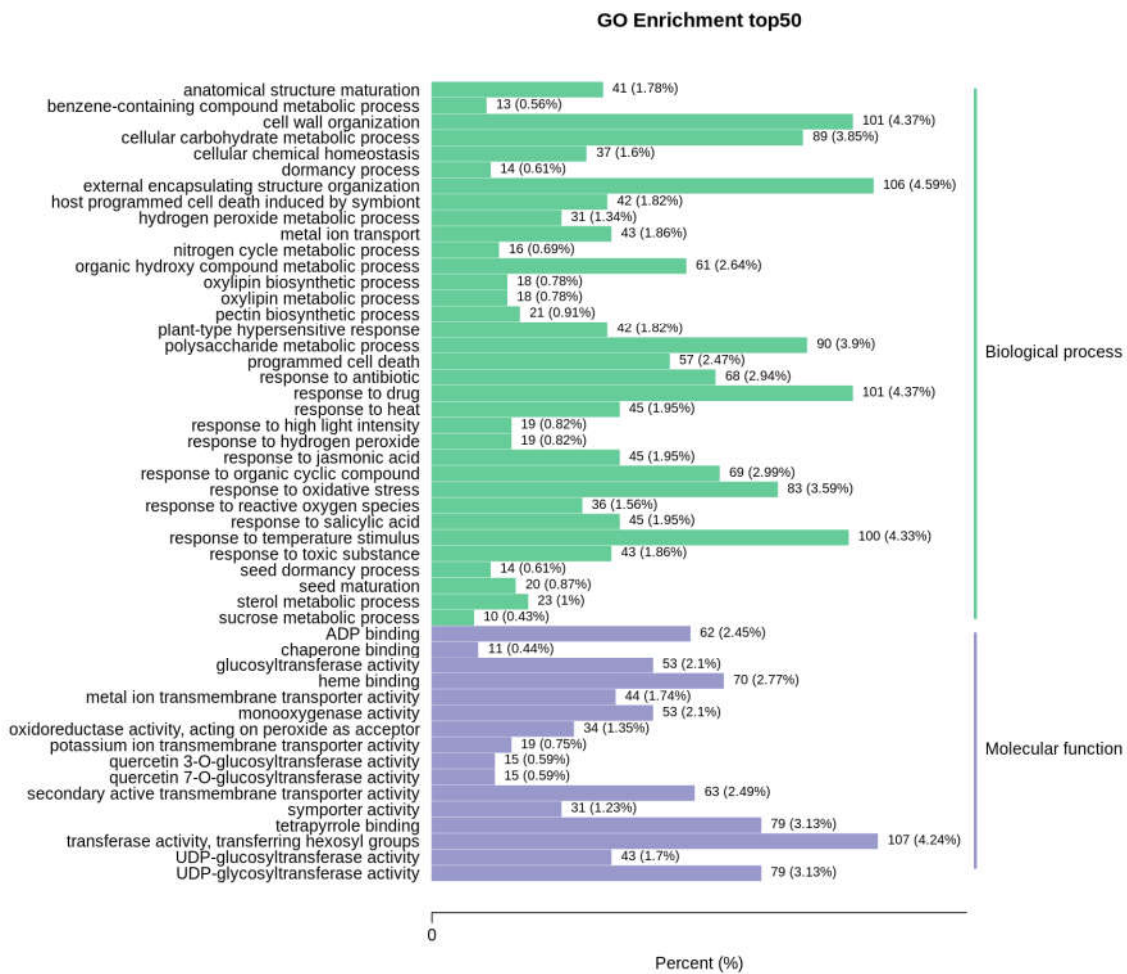

**Figure S5: GO enrichment analysis of differentially expressed genes**  
**BL\_vs\_TN4**

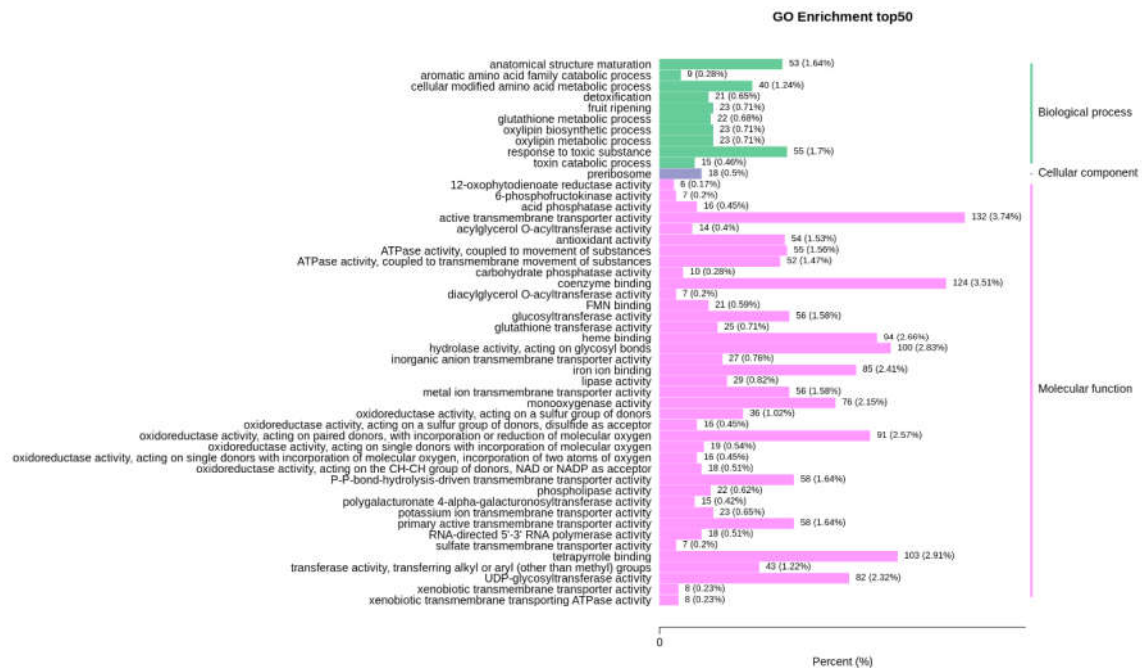

**CN\_vs\_TN17**

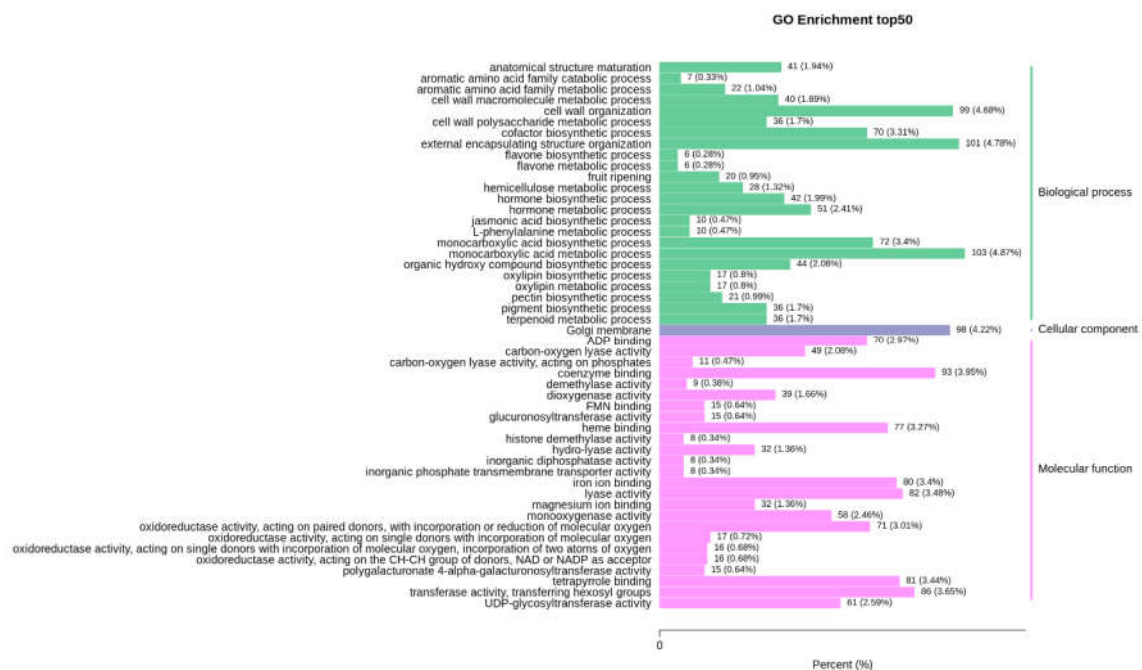

Figure S5: GO enrichment analysis of differentially expressed genes

CN\_vs\_TN21

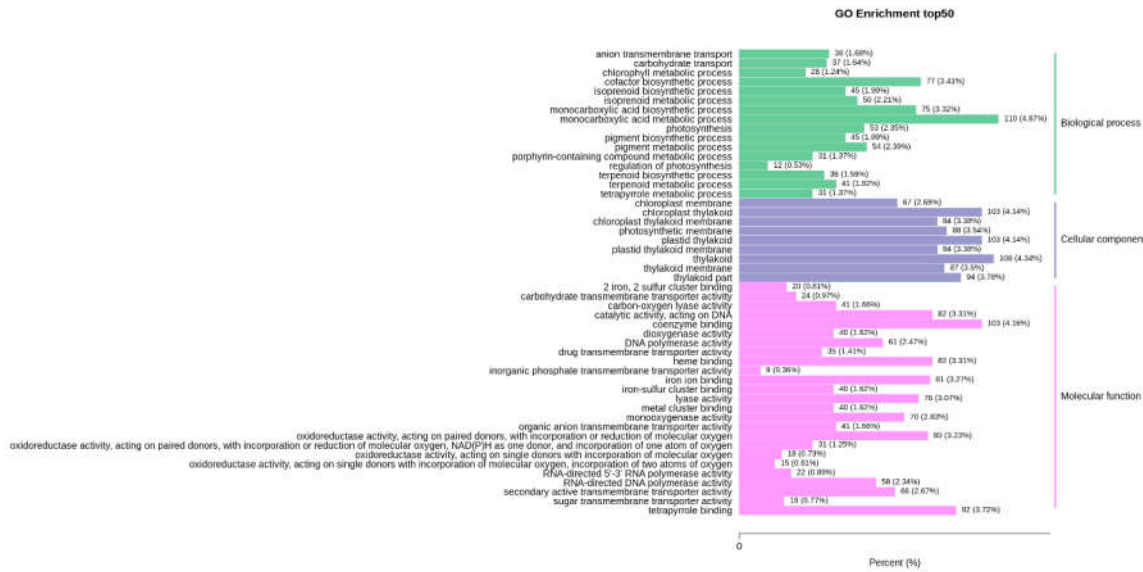

CN\_vs\_TN23

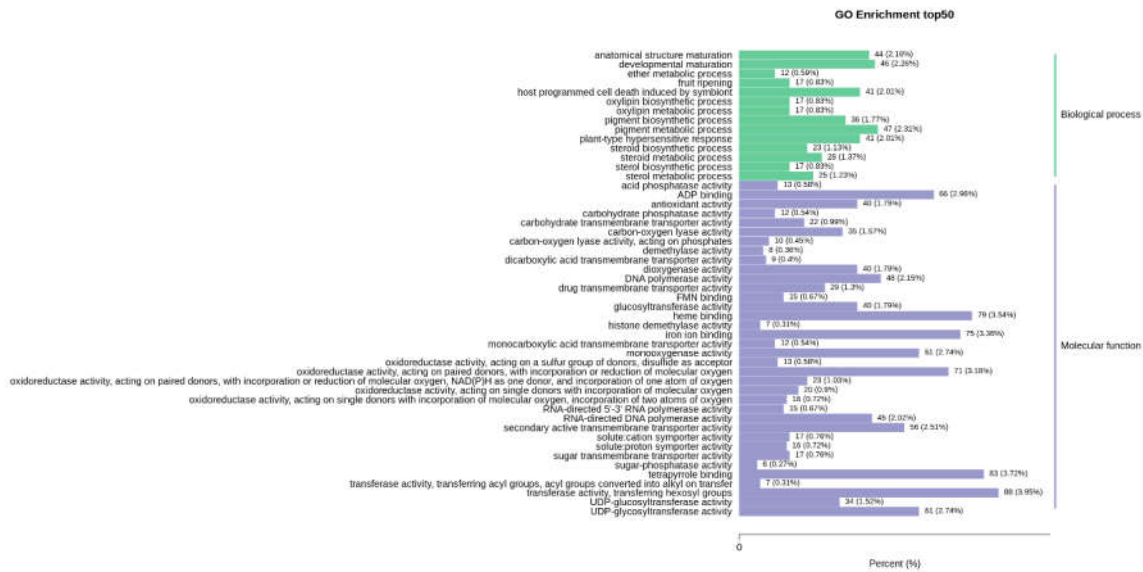



Figure S5: GO enrichment analysis of differentially expressed genes

CN\_vs\_TN4

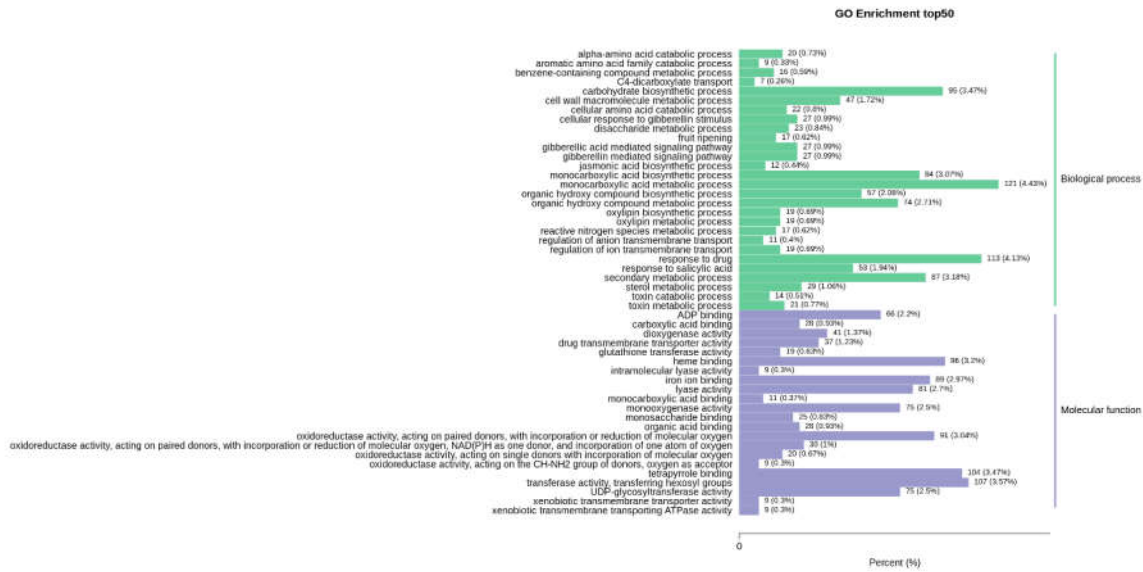

MD-2\_vs\_BL

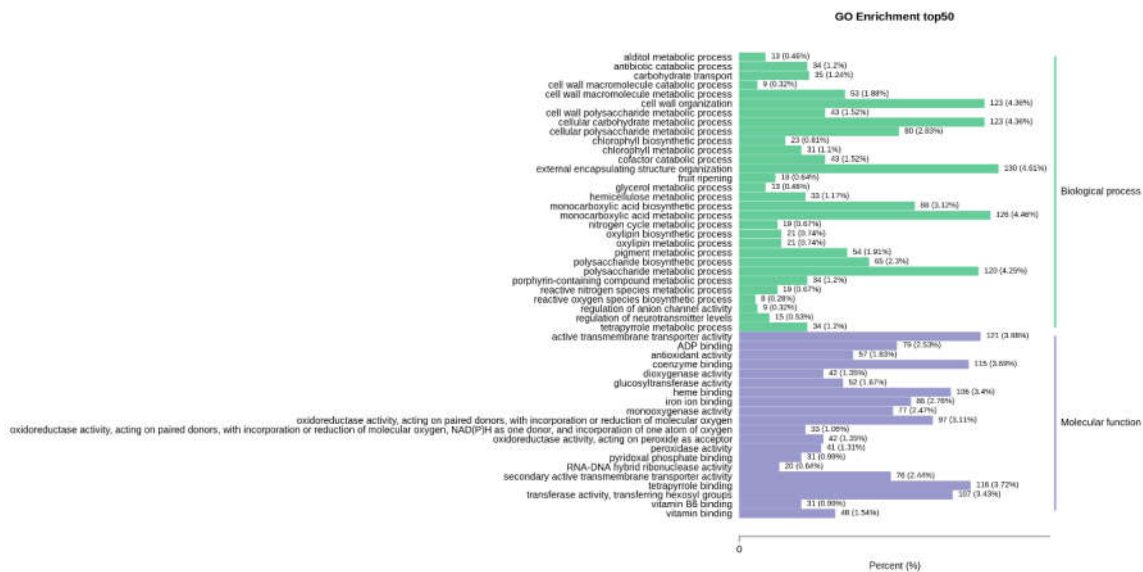

**Figure S5: GO enrichment analysis of differentially expressed genes**  
**MD-2\_vs\_CN**

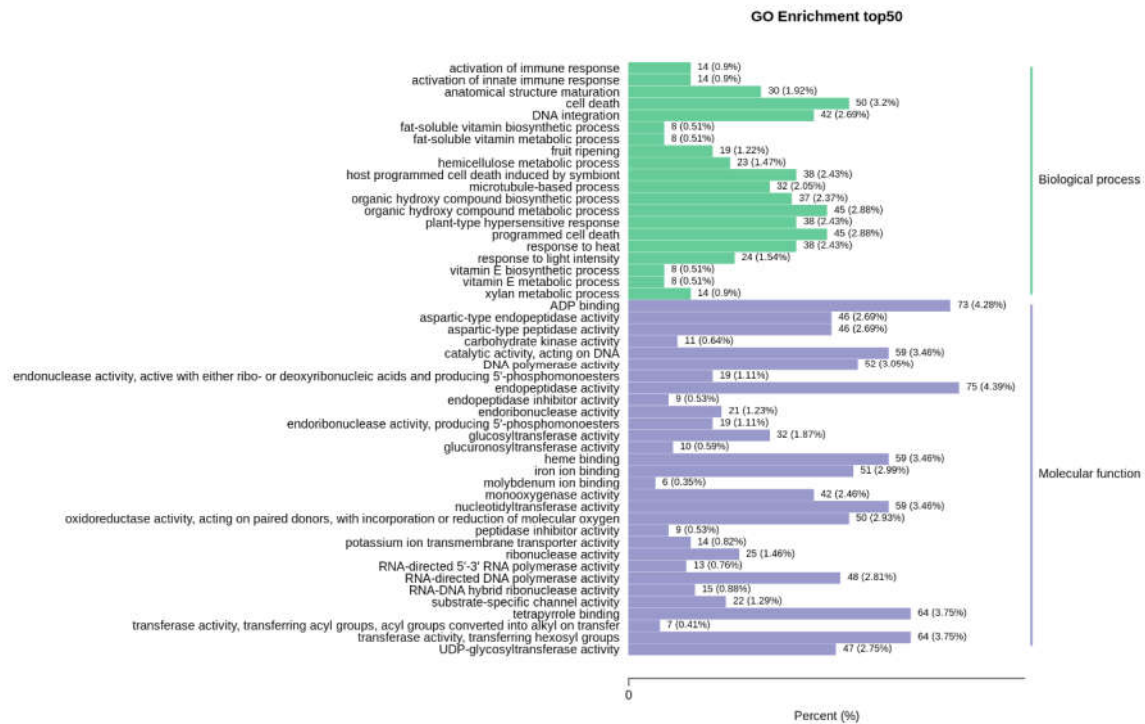

**MD-2\_vs\_TN17**

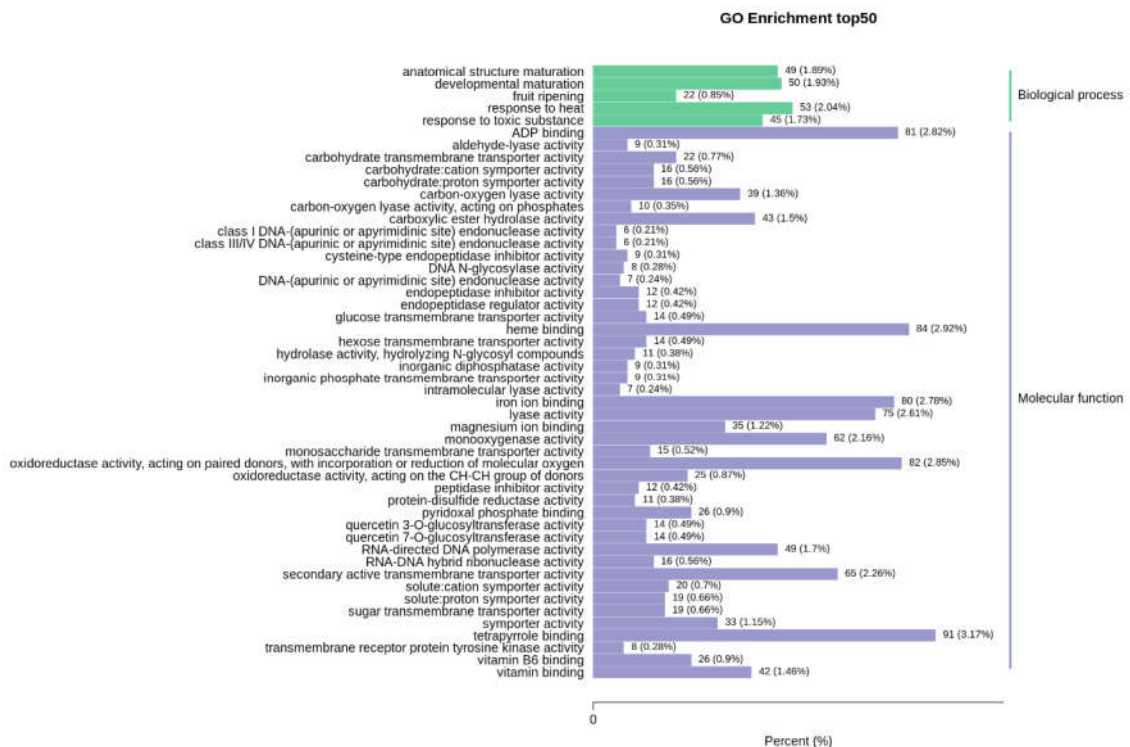



Figure S5: GO enrichment analysis of differentially expressed genes  
MD-2\_vs\_TN21

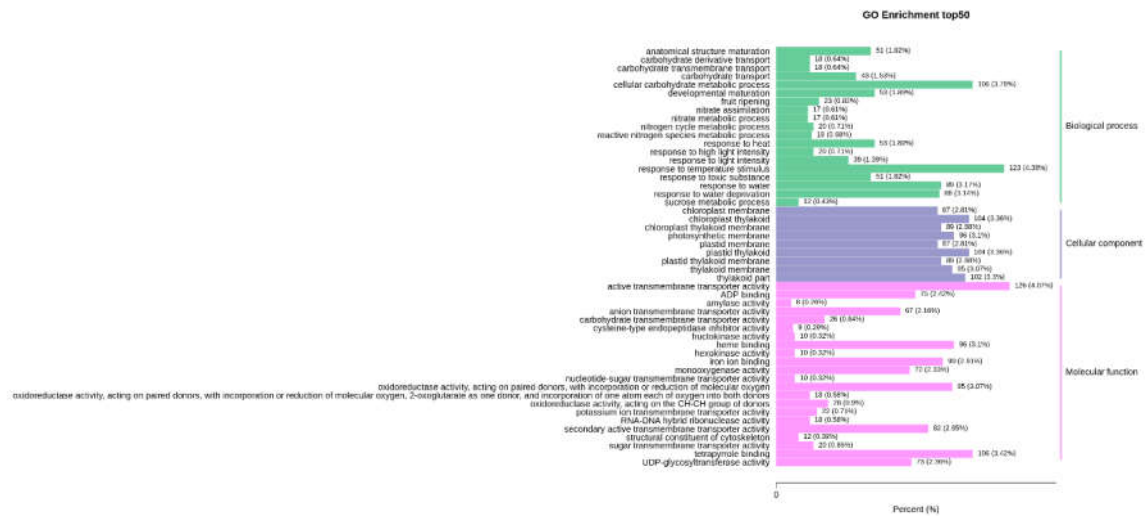

MD-2\_vs\_TN23

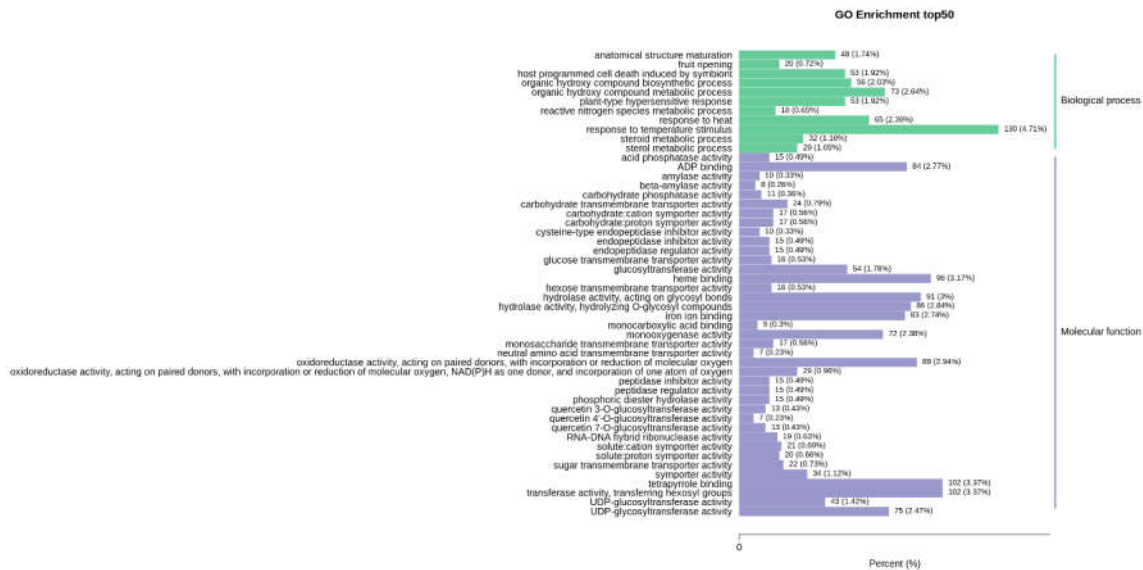

**Figure S5: GO enrichment analysis of differentially expressed genes**  
**MD-2\_vs\_TN4**

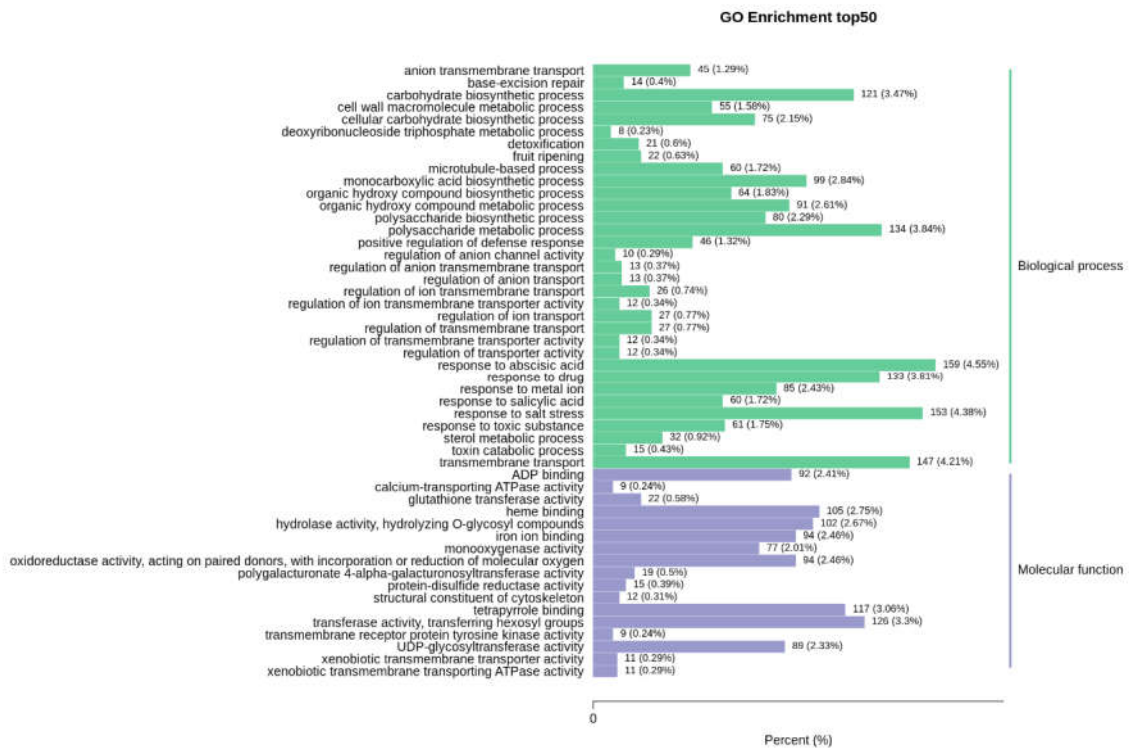

**TN17\_vs\_TN21**

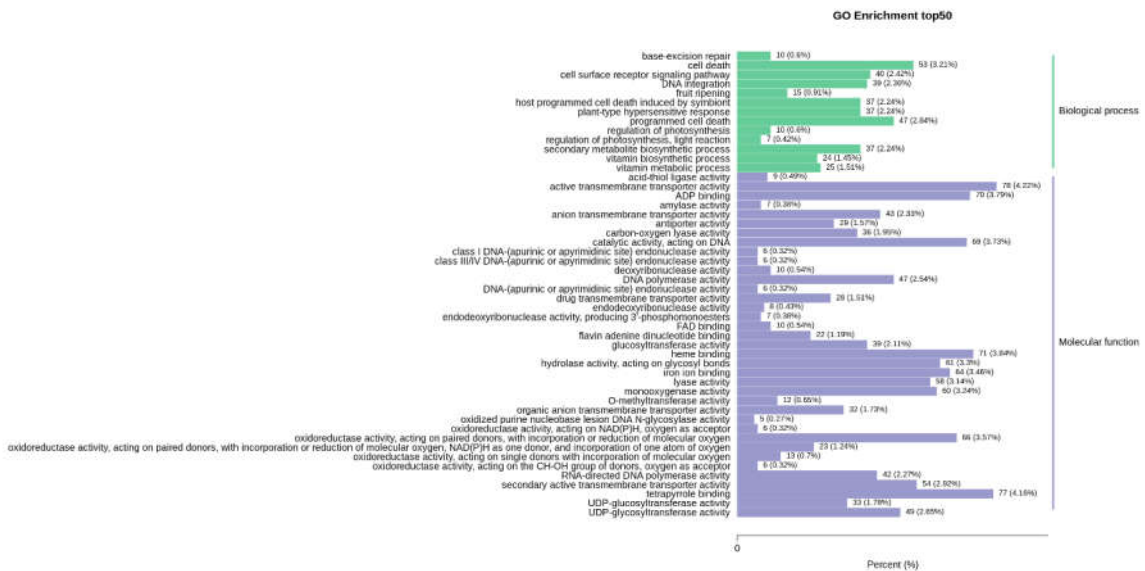

**Figure S5: GO enrichment analysis of differentially expressed genes**  
**TN17\_vs\_TN23**

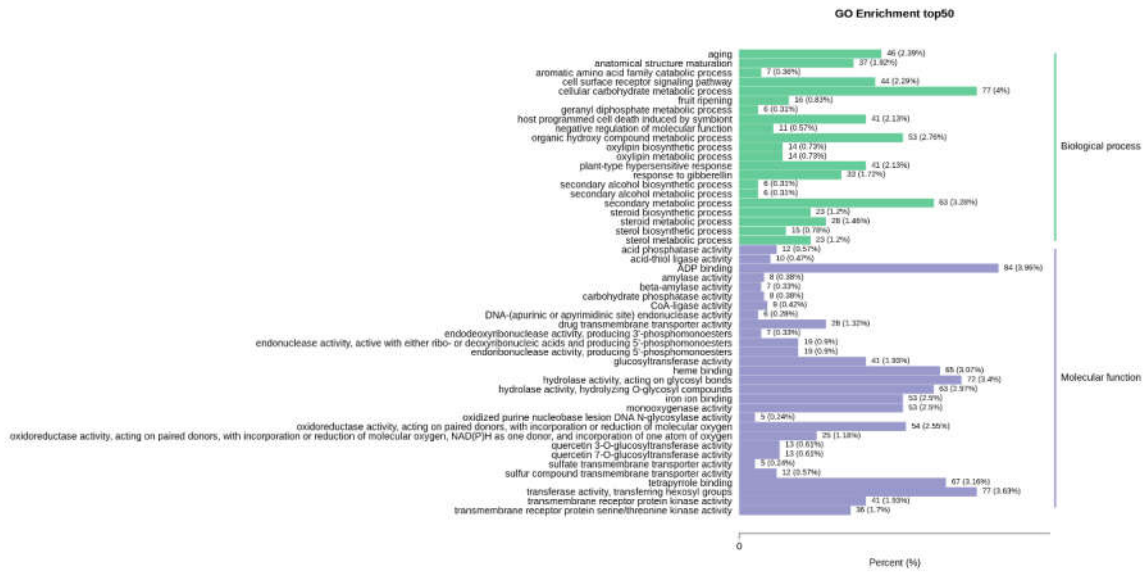

**TN21\_vs\_TN23**

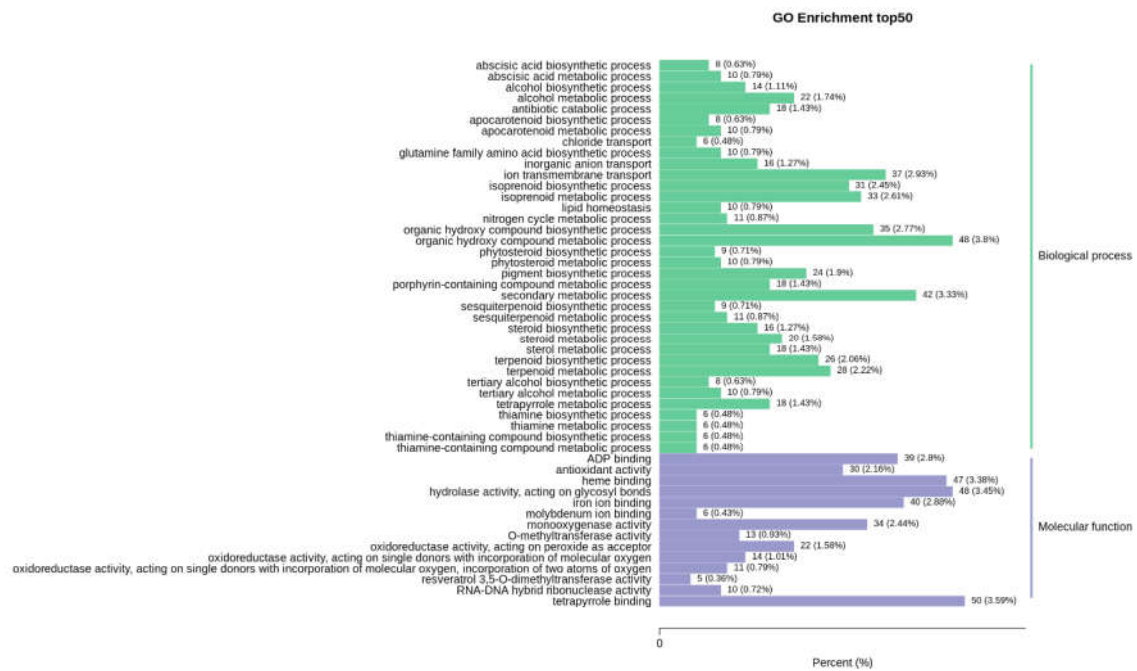

**TN4\_vs\_TN17**

**Figure S5: GO enrichment analysis of differentially expressed genes**

**TN4\_vs\_TN21**



**Figure S5: GO enrichment analysis of differentially expressed genes**

TN4\_vs\_TN23

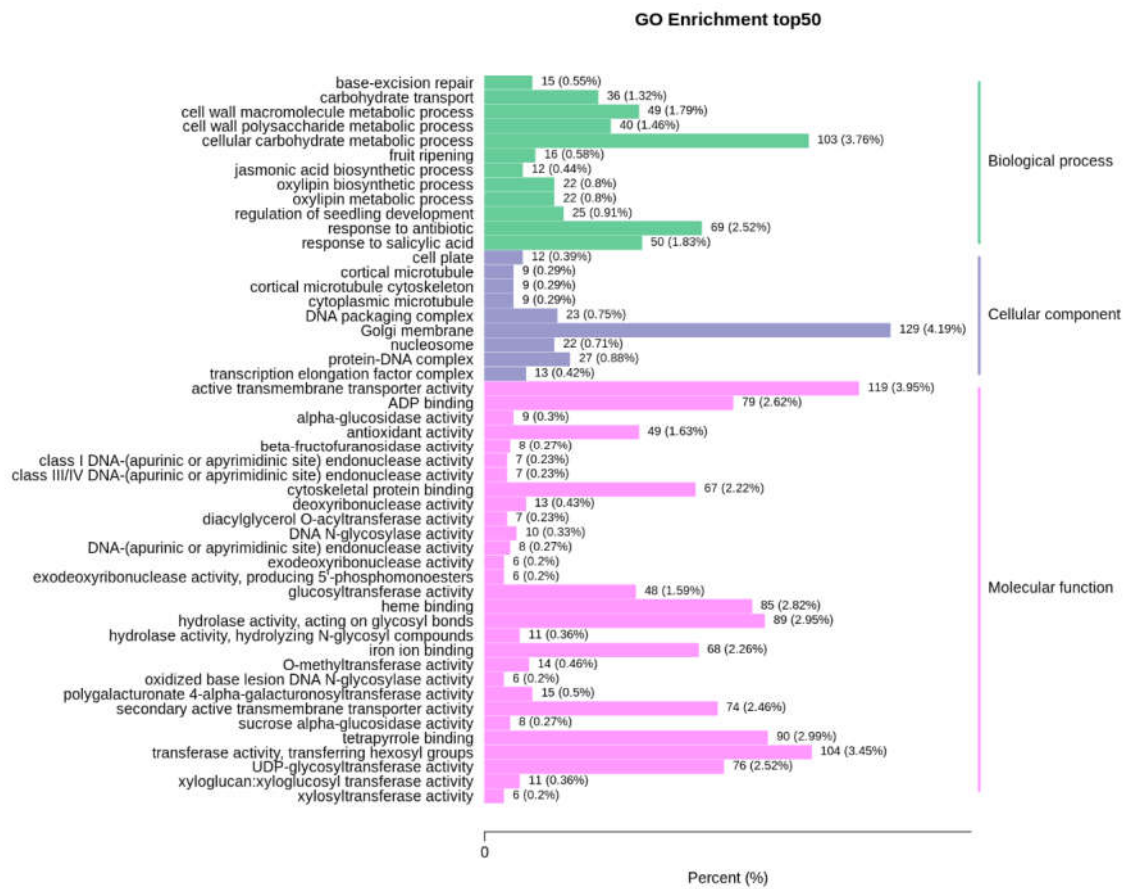

**Figure S5: GO enrichment analysis of differentially expressed genes**

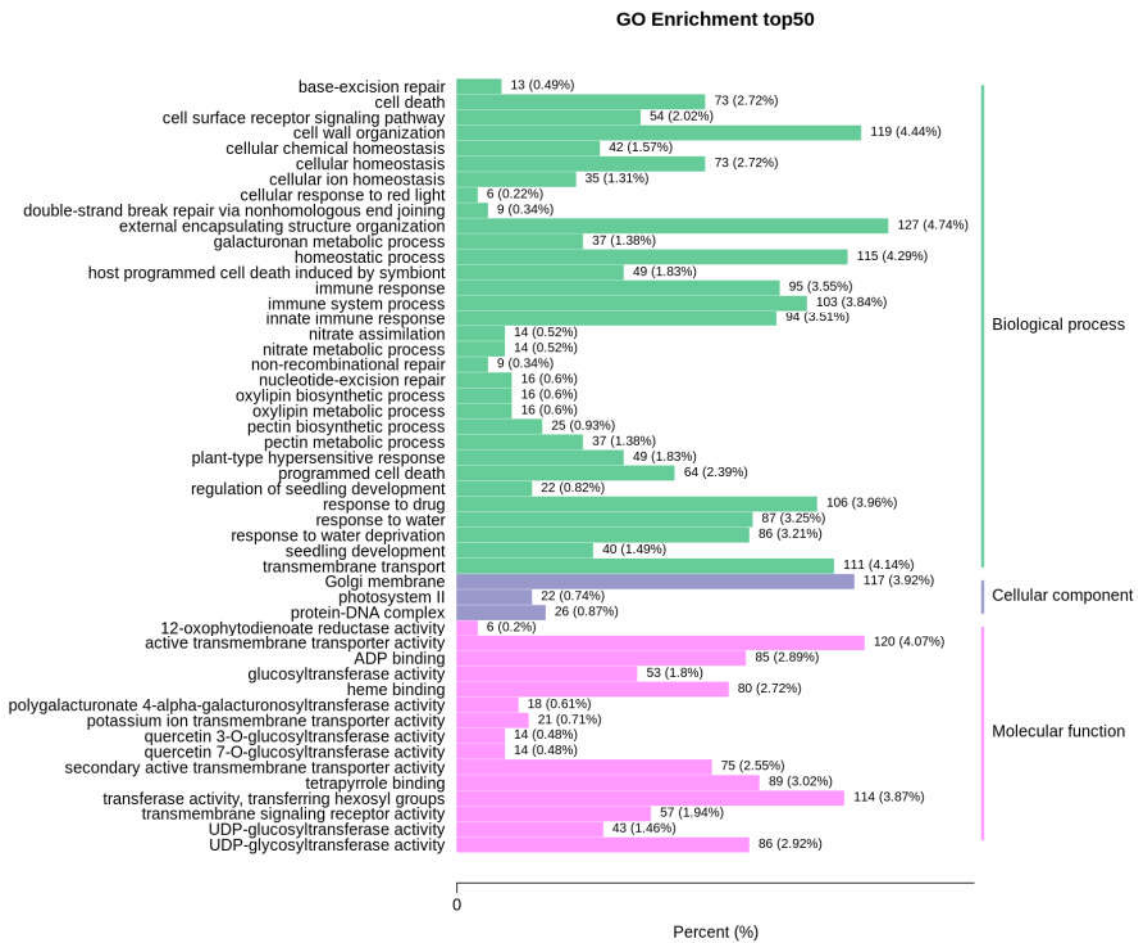



**Figure S5: GO enrichment analysis of differentially expressed genes**

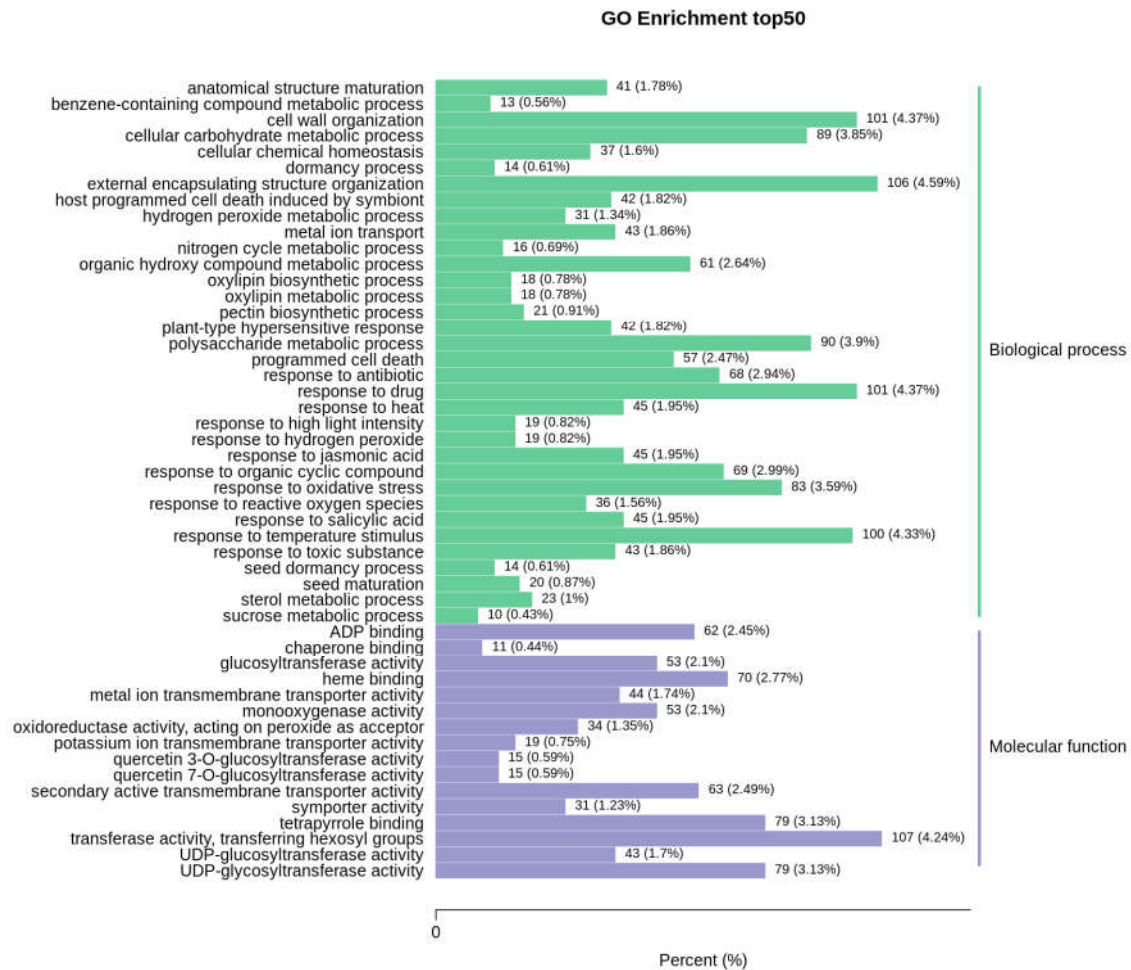

**Figure S5: GO enrichment analysis of differentially expressed genes**

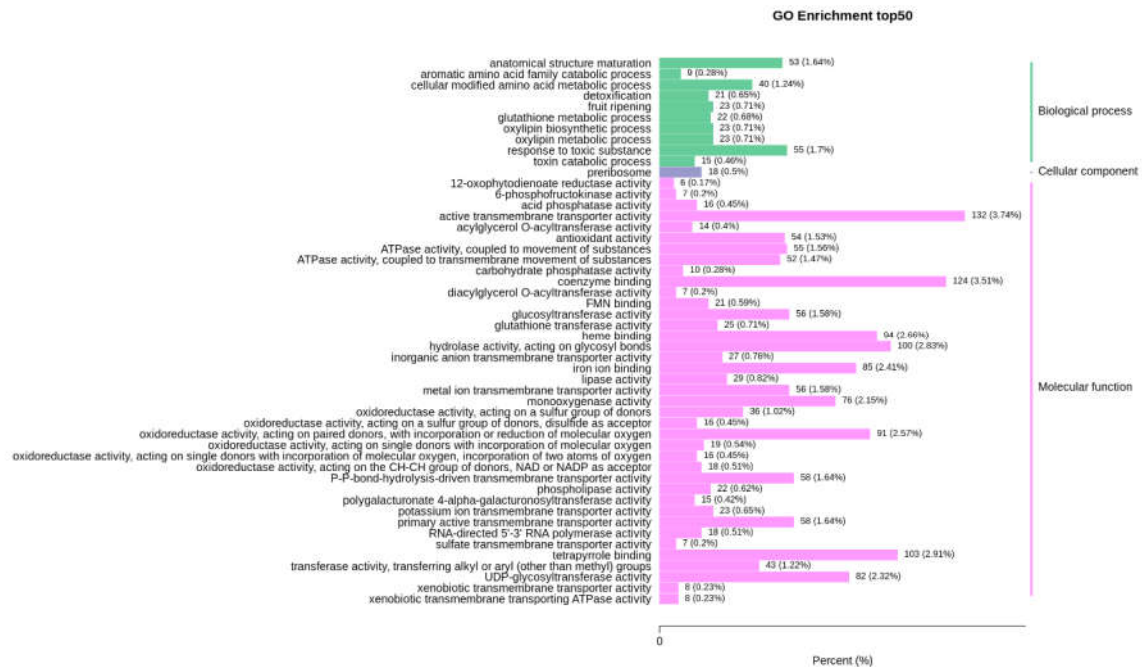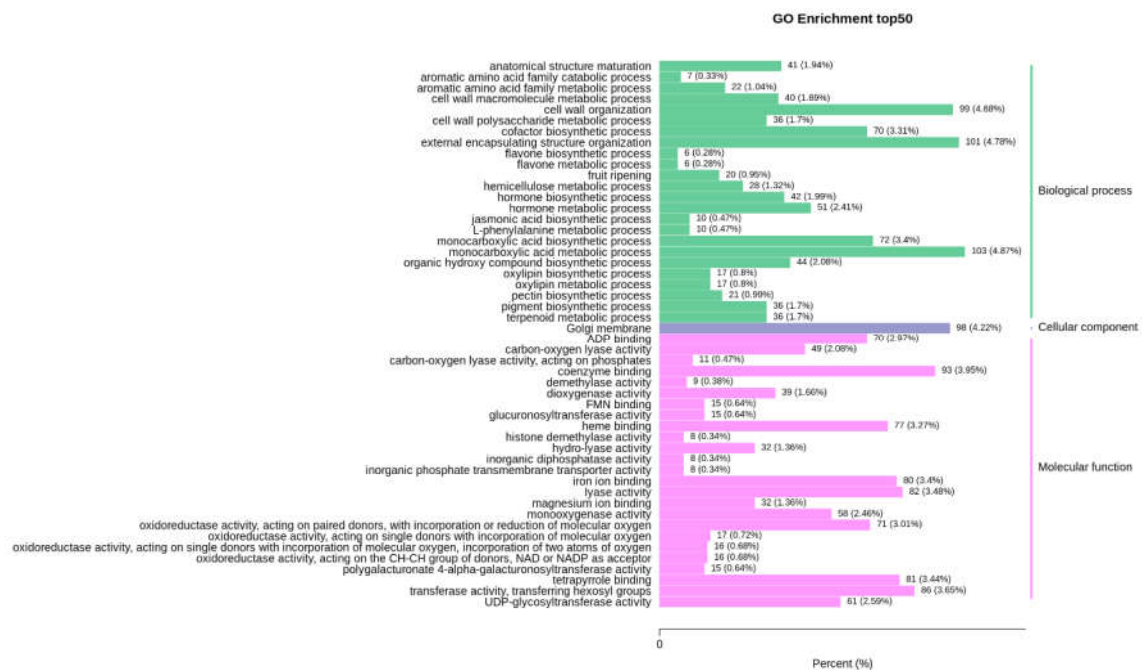

**Figure S5: GO enrichment analysis of differentially expressed genes**

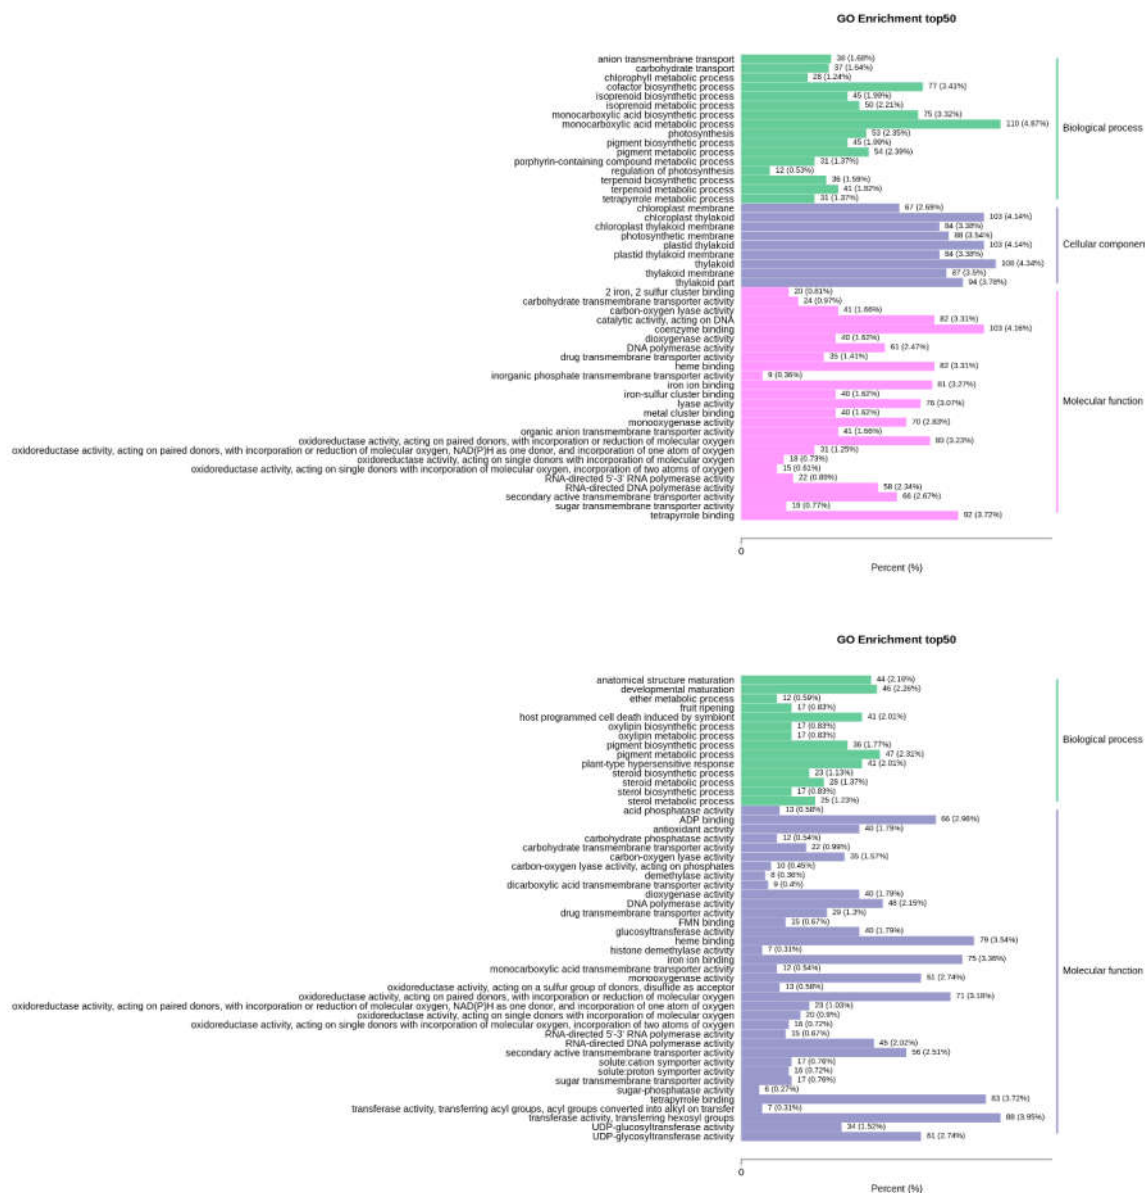

**Figure S5: GO enrichment analysis of differentially expressed genes**

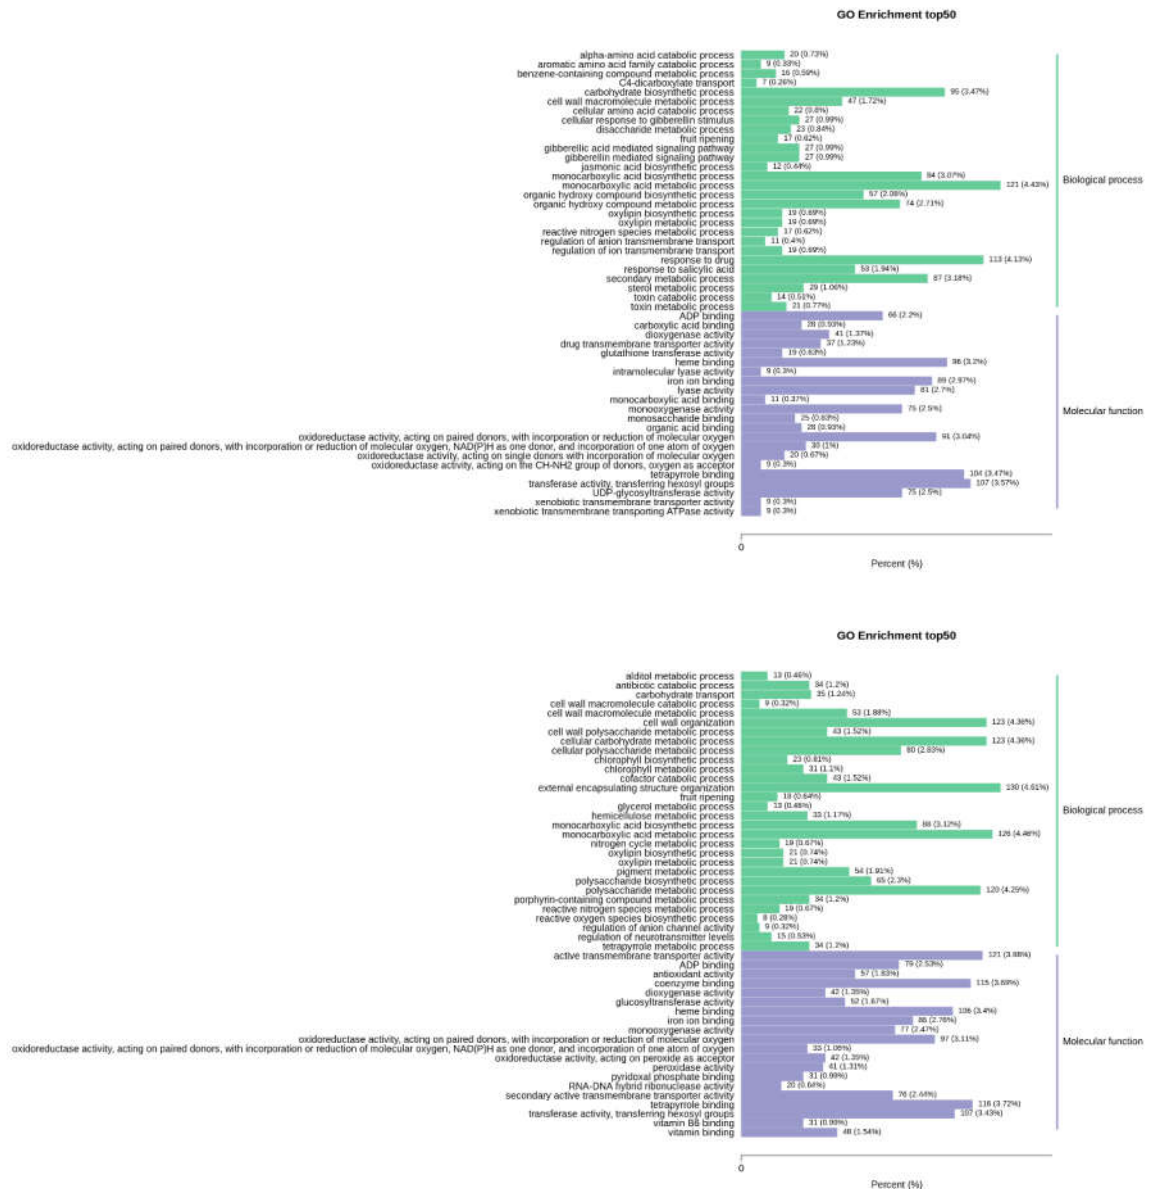

**Figure S5: GO enrichment analysis of differentially expressed genes**

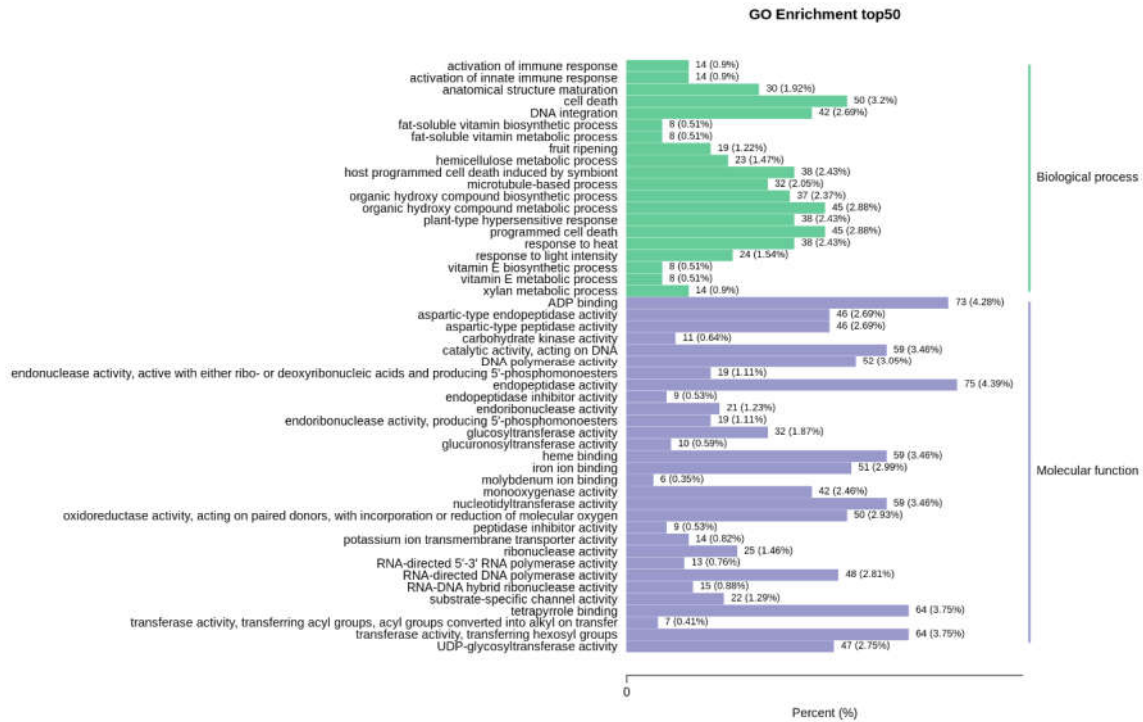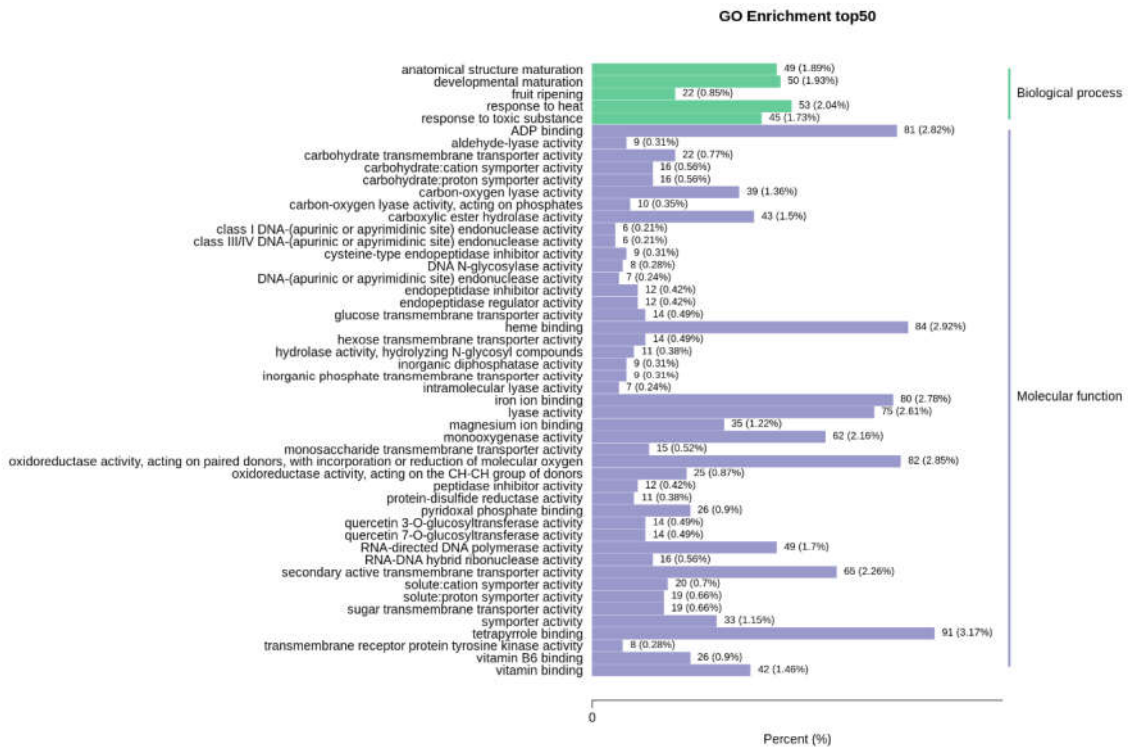



Figure S5: GO enrichment analysis of differentially expressed genes

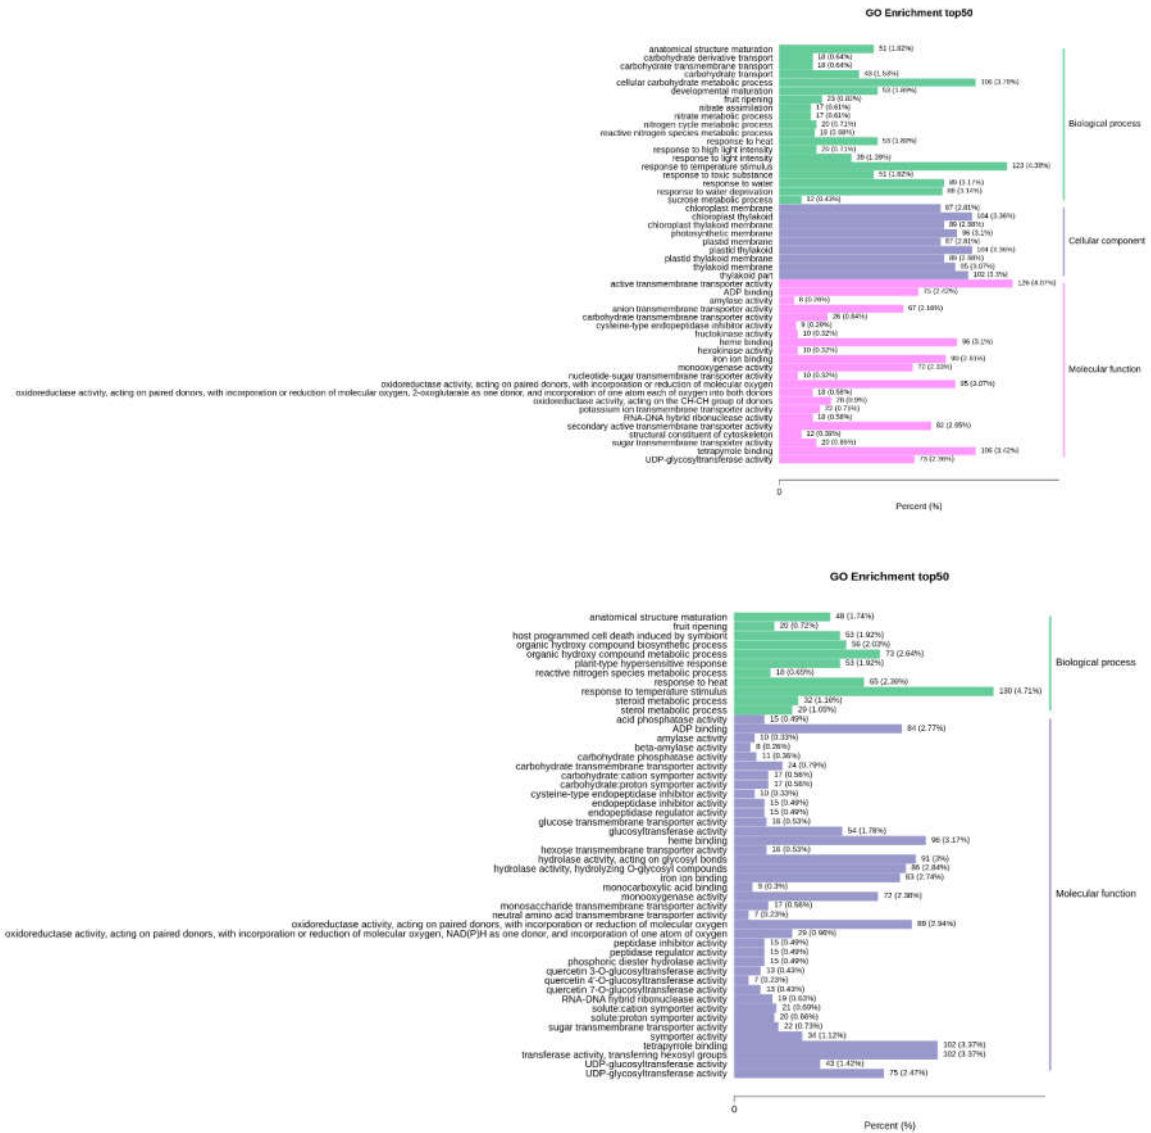



**Figure S5: GO enrichment analysis of differentially expressed genes**

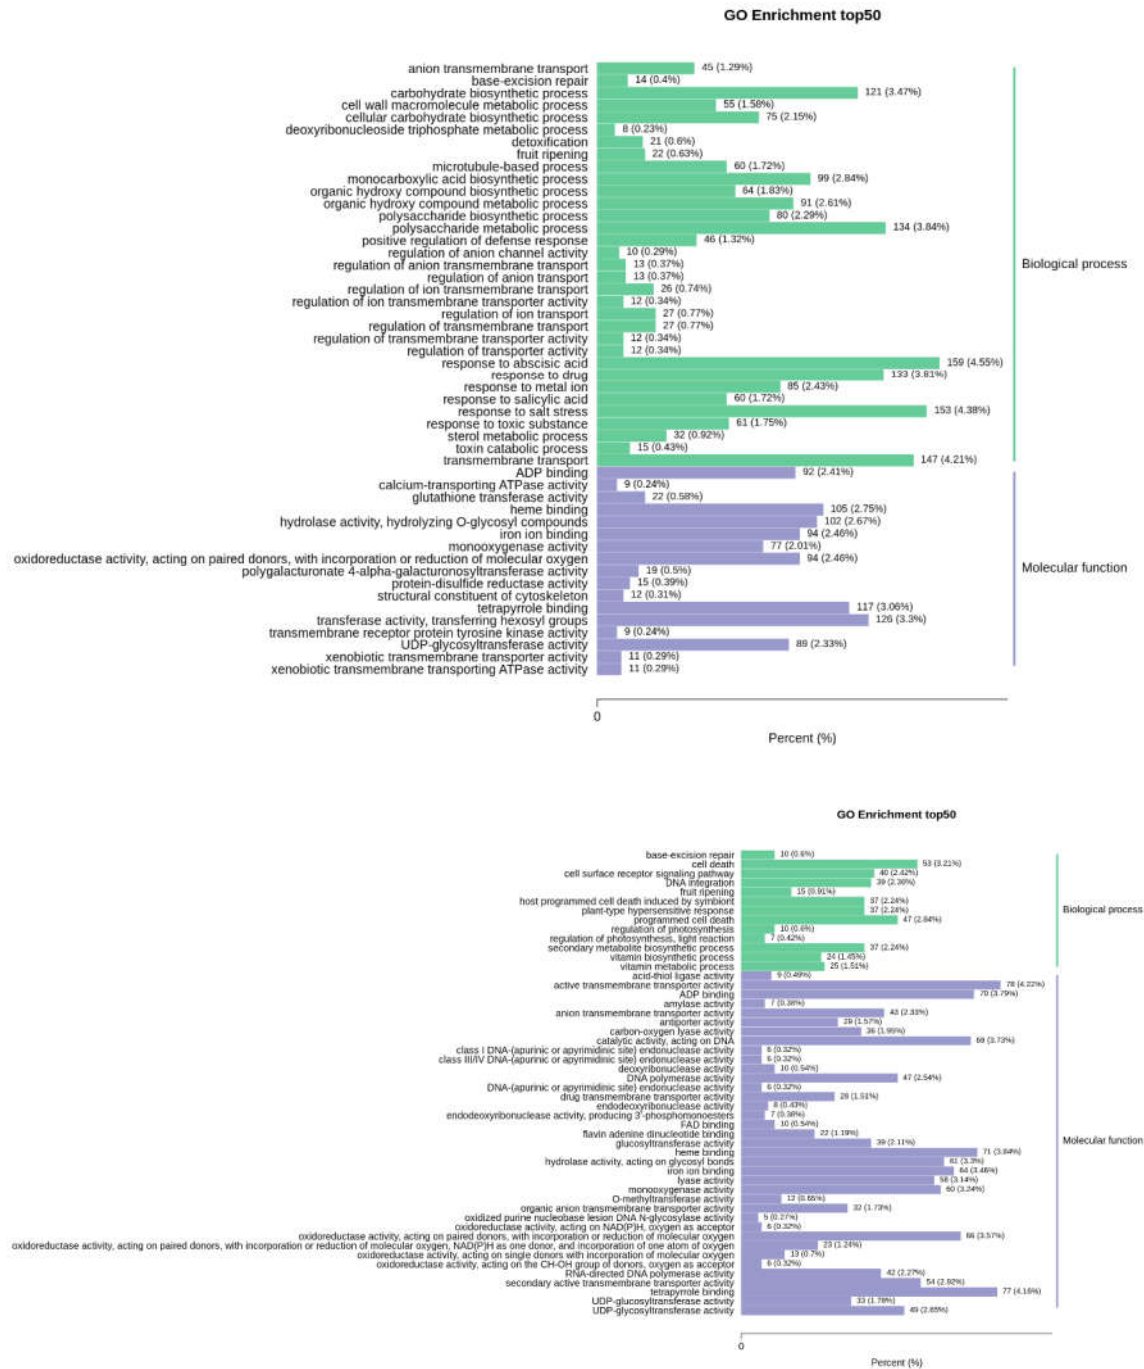

Figure S5: GO enrichment analysis of differentially expressed genes

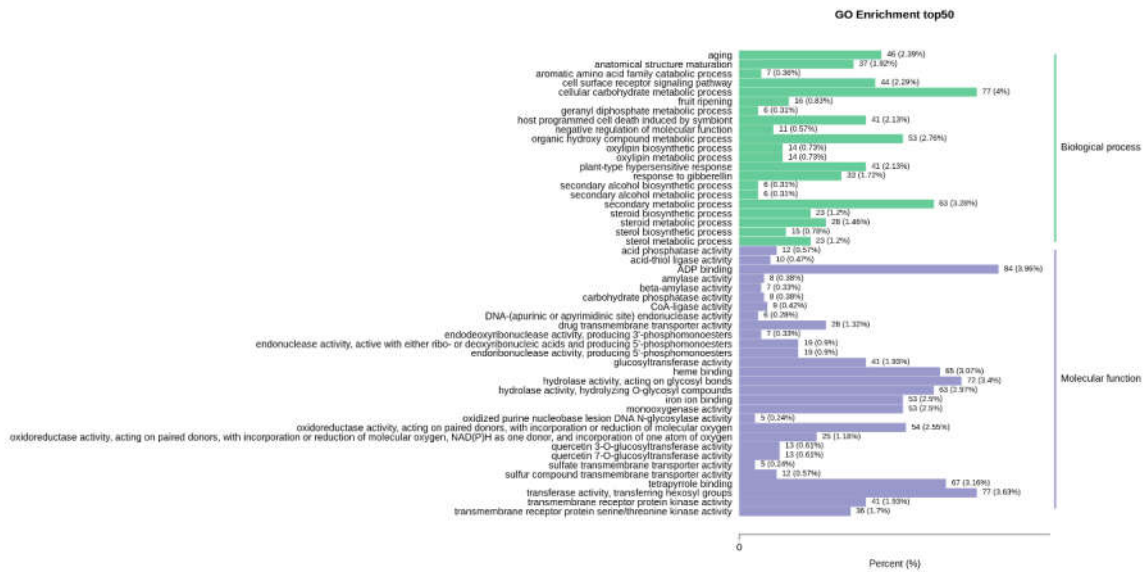

TN4\_vs\_TN21 Statistical plot of the number of differential genes contained in the secondary GO entry

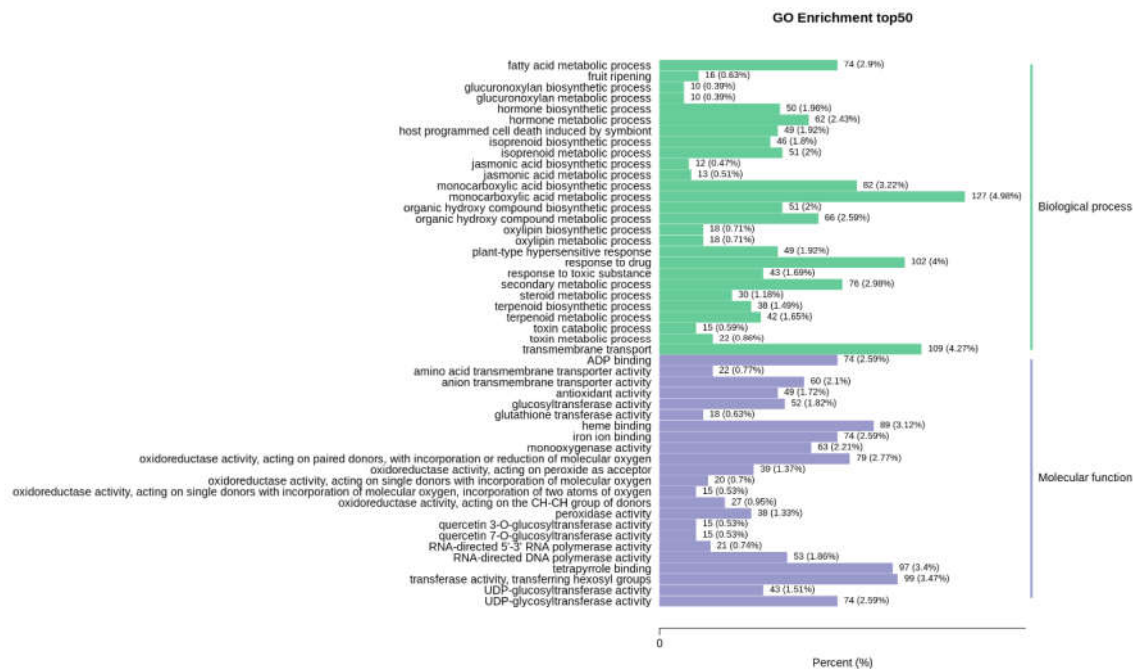

TN4\_vs\_TN23 Statistical plot of the number of differential genes contained in the secondary GO entry

**Figure S5: GO enrichment analysis of differentially expressed genes**

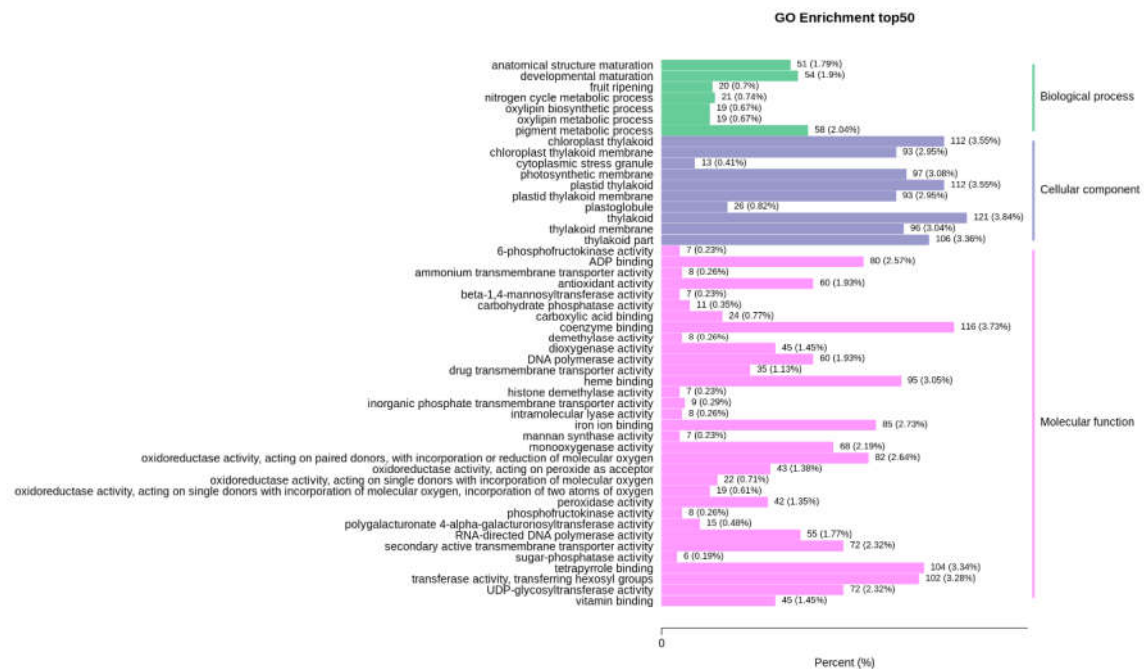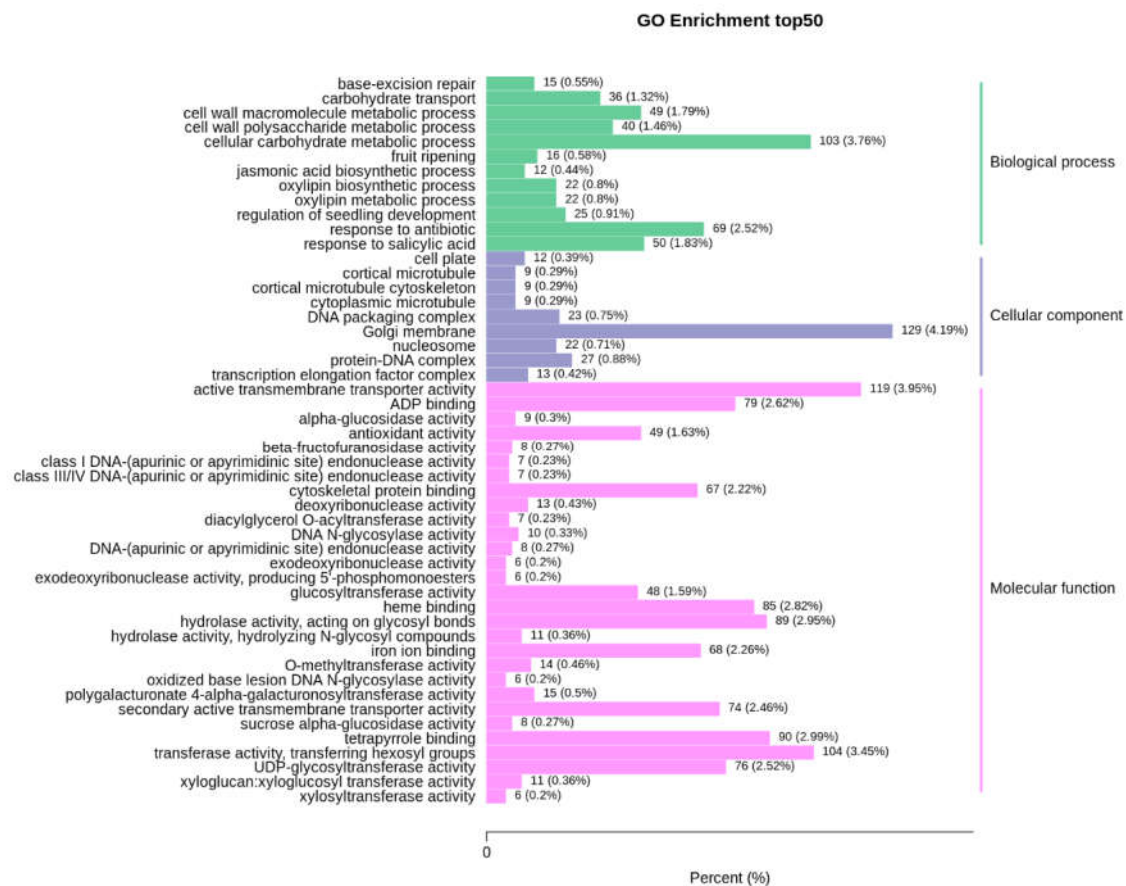

**Figure S5: GO enrichment analysis of differentially expressed genes**



**Figure S5: GO enrichment analysis of differentially expressed genes**





**Figure S5: GO enrichment analysis of differentially expressed genes**





**Figure S5: GO enrichment analysis of differentially expressed genes**



**Figure S5: GO enrichment analysis of differentially expressed genes**

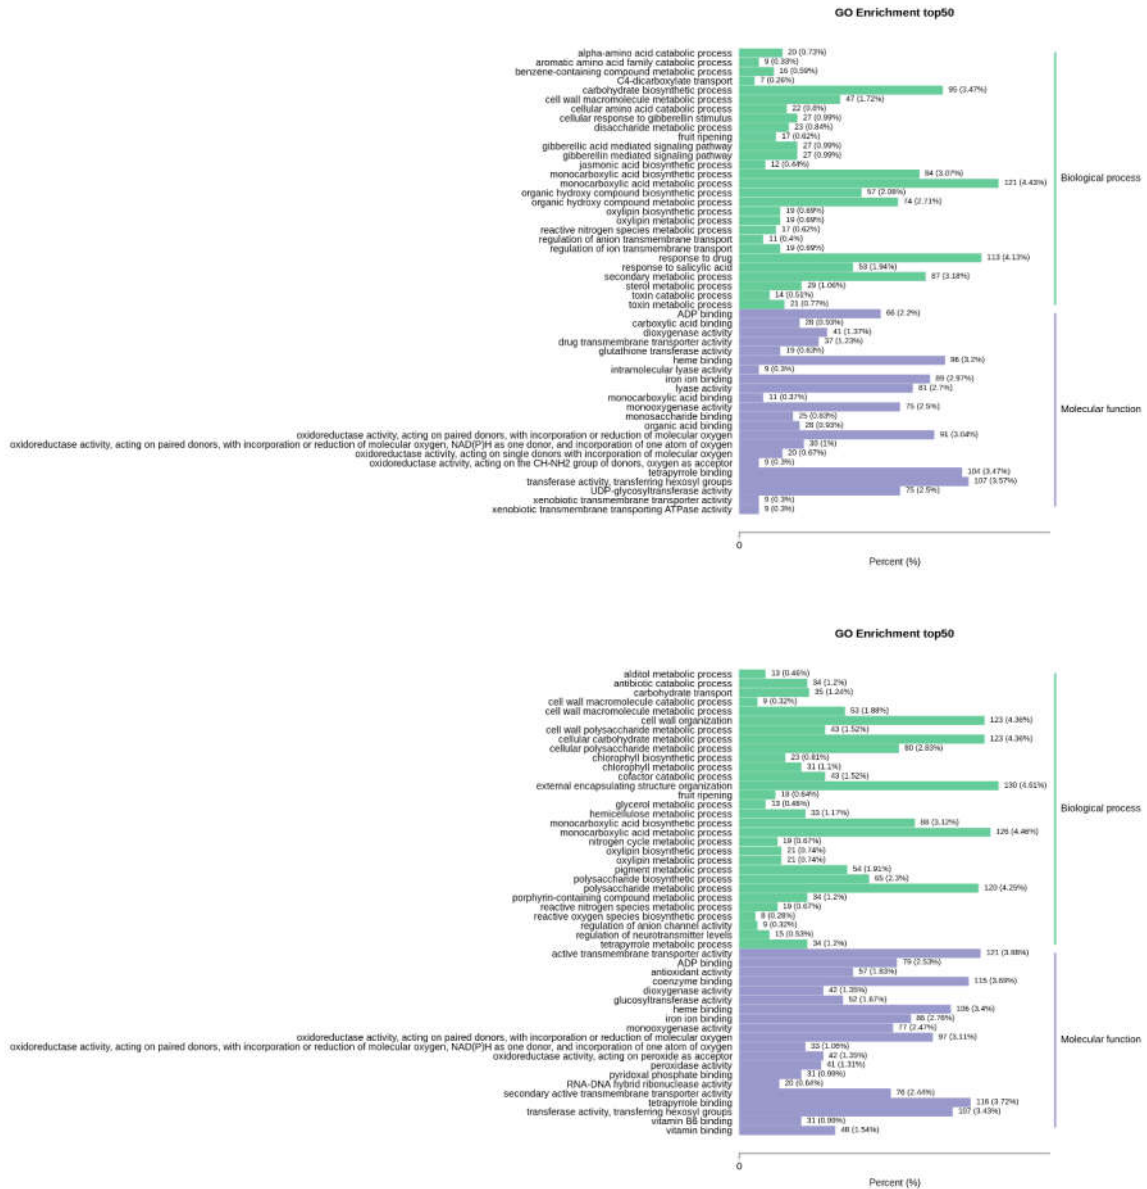

**Figure S5: GO enrichment analysis of differentially expressed genes**



Figure S5: GO enrichment analysis of differentially expressed genes



**Figure S5: GO enrichment analysis of differentially expressed genes**





**Figure S5: GO enrichment analysis of differentially expressed genes**



TN4\_vs\_TN23 Statistical plot of the number of differential genes contained in the secondary GO entry

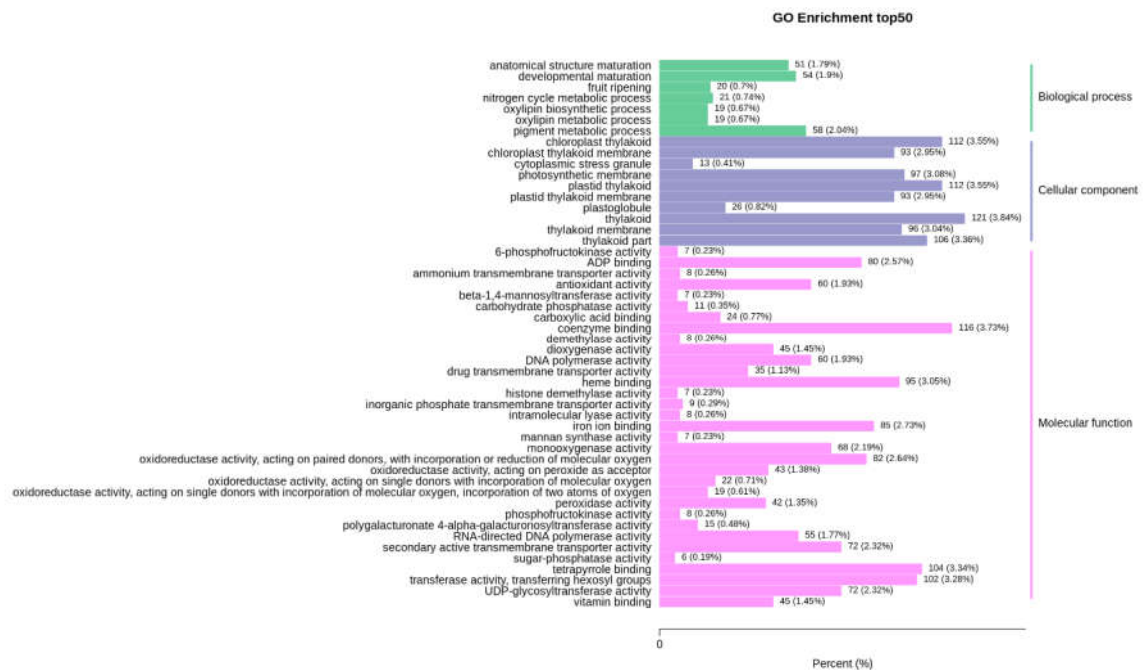



**Figure S5: GO enrichment analysis of differentially expressed genes**

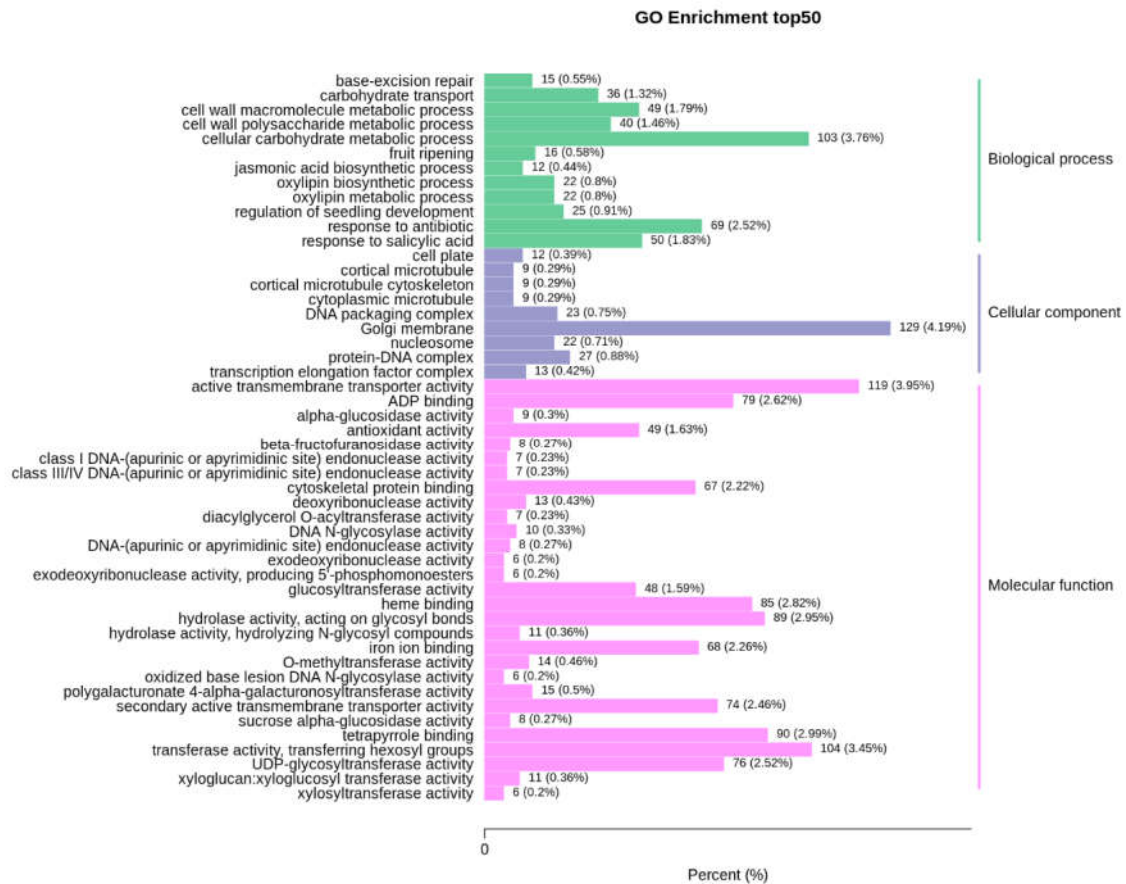

**Figure S5: GO enrichment analysis of differentially expressed genes**



**Figure S5: GO enrichment analysis of differentially expressed genes**



**Figure S5: GO enrichment analysis of differentially expressed genes**



Figure S5: GO enrichment analysis of differentially expressed genes

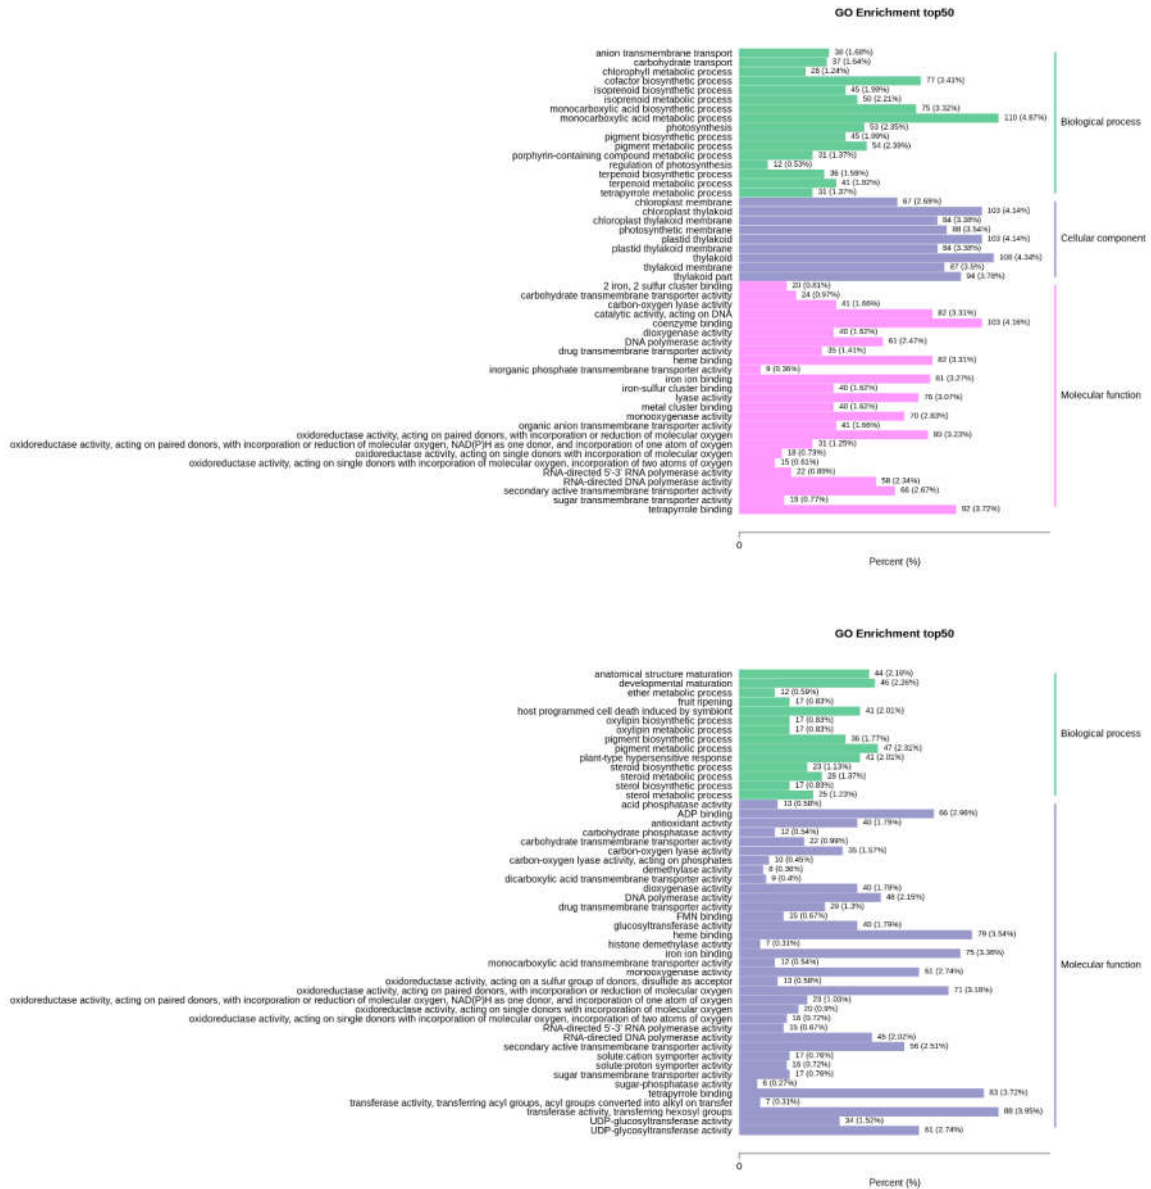



**Figure S5: GO enrichment analysis of differentially expressed genes**



**Figure S5: GO enrichment analysis of differentially expressed genes**



Figure S5: GO enrichment analysis of differentially expressed genes



**Figure S5: GO enrichment analysis of differentially expressed genes**



**Figure S5: GO enrichment analysis of differentially expressed genes**

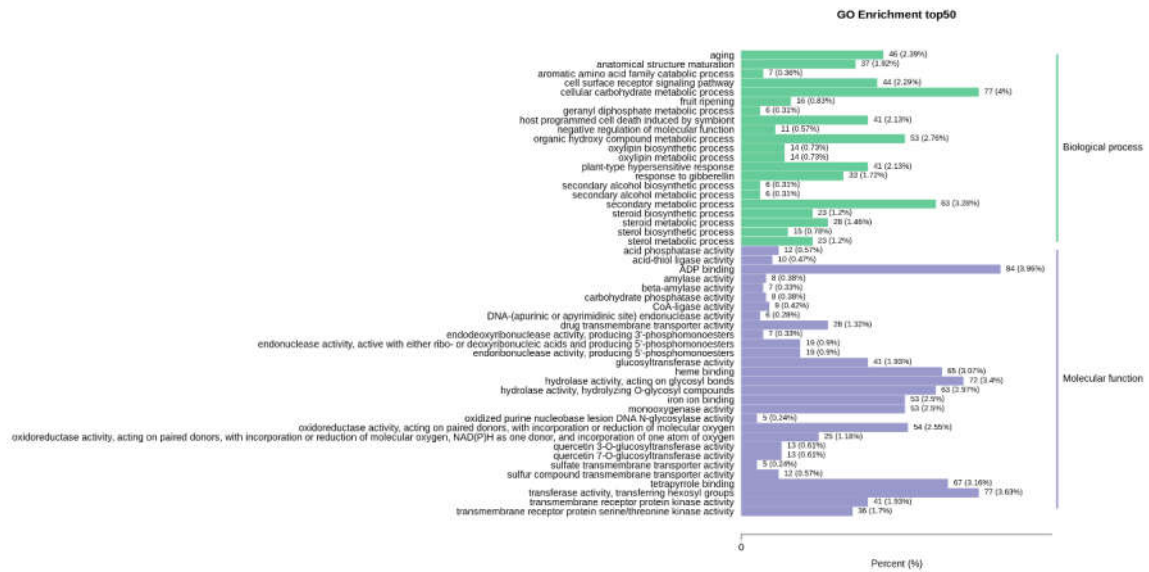

Supplement: s1 [file s1]
